# Supplementary material for: Design, synthesis, biological assessment and in silico ADME prediction of new 2-(4-(methylsulfonyl) phenyl) benzimidazoles as selective cyclooxygenase-2 inhibitors
Source: Royal Society of Chemistry journal article supplement (doi:10.1039/d1ra04756f), 2021-01-01

## Supporting Information

### Design, synthesis, biological assessment, and *In Silico* ADME prediction of some new 2-(4-(methyl sulfonyl) phenyl) benzimidazoles as selective cyclooxygenase-2 inhibitors

Mohamed A. S. Badawy<sup>a\*</sup>, Eman K. A. Abdelall<sup>b</sup>, El-Shaymaa El-Nahass<sup>c</sup>, Khaled R. A. Abdellatif<sup>b, d</sup>, Hamdy M. Abdel-Rahman<sup>a, e</sup>

#### 1. General Information:

Melting points were detected by Tomas-Hoover capillary melting apparatus without any correction. All solvents, chemical, and reagent supplied from Aldrich chemical company (Milwaukee, WI), and El Nasr pharmaceutical chemical companies, Cairo, Egypt. Infrared (IR) spectra was monitored as films on KBr discs using Shimadzu FT-IR 8400S spectrophotometer and values were presented as  $\text{cm}^{-1}$ . Purity of the synthesized compounds, and Reaction's progress were checked by using precoated thin layer chromatography (TLC) silica gel plates 60F254 with thickness of 0.25 supplied from MERCK, Darmstadt, Germany. UV  $\lambda_{\text{max}}$  was used to monitor reaction process.  $^{13}\text{C}$  NMR and  $^1\text{H}$  NMR spectra were carried out on a Bruker avance III 400 MHz spectrophotometer, faculty of pharmacy, Benisuef University and Mansoura University, Egypt in dimethyl sulfoxide ( $\text{DMSO-d}_6$ ) or  $\text{D}_2\text{O}$  as a solvent. Chemical shift was estimated in ppm on  $\delta$  scale and  $J$  (Coupling constant) was estimated in Hertz. Microanalysis for C, H, and N were performed on perkin-Elmer 2400 analyzer (perkin-Elmer, Norwalk, CT. USA) at the regional center for mycology and Biotechnology, Al-azhar University, Egypt. All results were with in  $\pm 0.4\%$  of the theoretical values.

**Table**

| Compd.<br>No | <sup>1</sup> H-NMR(ppm)     |                                          |                    |                      | S1: <sup>1</sup> H-<br>NMR<br>chemic<br>al<br>shifts<br>and the<br>ratios<br>of peak<br>intensit<br>ies of<br>selecte<br>d<br>peaks<br>in<br>compo |
|--------------|-----------------------------|------------------------------------------|--------------------|----------------------|----------------------------------------------------------------------------------------------------------------------------------------------------|
|              | N=CH <sub>3</sub> (Ratio %) | N-CH <sub>2</sub> (Ratio %) <sup>a</sup> | N=CH (Ratio %)     | CONH(Ratio %)        |                                                                                                                                                    |
| <b>11a</b>   | -                           | 5.14, 5.62 (26:74)                       | 8.12, 8.28 (74:26) | 11.83, 12.01 (74:26) |                                                                                                                                                    |
| <b>11b</b>   | -                           | 5.13, 5.62 (26:74)                       | 8.12, 8.26 (74:26) | 11.88, 12.07 (74:26) |                                                                                                                                                    |
| <b>11c</b>   | -                           | 5.11, 5.58 (26:74)                       | 8.10, 8.12 (74:26) | 11.60, 11.99 (74:26) |                                                                                                                                                    |
| <b>11d</b>   | -                           | 5.13, 5.62 (26:74)                       | 8.11, 8.26 (74:26) | 11.84, 12.03 (74:26) |                                                                                                                                                    |
| <b>11e</b>   | -                           | 5.11, 5.64 (26:74)                       | 8.13, 8.20 (74:26) | 11.83, 11.98 (74:26) |                                                                                                                                                    |
| <b>11f</b>   | -                           | 5.61, 5.63 (23:77)                       | 8.12, 8.27 (77:23) | 11.91, 12.10 (77:23) |                                                                                                                                                    |
| <b>11g</b>   | -                           | 5.14, 5.51 (24:76)                       | 8.06, 8.25 (76:24) | 11.70, 11.82 (76:24) |                                                                                                                                                    |
| <b>11h</b>   | -                           | 5.16, 5.65 (25:75)                       | 8.12, 8.26 (75:25) | 11.81, 12.01 (75:25) |                                                                                                                                                    |
| <b>11i</b>   | -                           | 5.24, 5.67 (23:77)                       | 8.11, 8.26 (77:23) | 11.80, 12.01 (77:23) |                                                                                                                                                    |
| <b>11j</b>   | -                           | 5.48, 5.58 (22:78)                       | 8.13, 8.27 (78:22) | 11.10, 12.09 (78:24) |                                                                                                                                                    |
| <b>11k</b>   | -                           | 5.58, 5.49 (31:69)                       | 8.10, 8.25 (69:31) | 11.86, 12.05 (69:31) |                                                                                                                                                    |
| <b>11l</b>   | -                           | 5.24, 5.56 (29:71)                       | 8.10, 8.26 (71:29) | 11.78, 12.02 (71:29) |                                                                                                                                                    |
| <b>12a</b>   | 2.37, 2.26 (77:23)          | 5.28, 5.64 (23:77)                       | -                  | 10.98, 11.08 (23:77) |                                                                                                                                                    |
| <b>12b</b>   | 2.29, 2.50 (69:31)          | 5.24, 5.59 (31:69)                       | -                  | 11.09, 12.02 (31:69) |                                                                                                                                                    |
| <b>12c</b>   | 2.29, 2.35 (77:23)          | 5.28, 5.57 (23:77)                       | -                  | 10.94, 11.07 (31:69) |                                                                                                                                                    |
| <b>12d</b>   | 2.25, 2.23 (78:22)          | 4.93, 5.69 (22:78)                       | -                  | 10.99, 11.18 (22:78) |                                                                                                                                                    |
| <b>12f</b>   | 2.47, 2.56<br>(62:38)       | 5.26, 6.64 (38:62)                       | -                  | 11.07, 11.12 (38:62) |                                                                                                                                                    |

unds

<sup>a</sup>)Approximate ratio as determined from peak integration.

| Isomer                                    | E isomer                                                                                                                                                                                                           | Z isomer                                                                                                                                                                                                             |
|-------------------------------------------|--------------------------------------------------------------------------------------------------------------------------------------------------------------------------------------------------------------------|----------------------------------------------------------------------------------------------------------------------------------------------------------------------------------------------------------------------|
| 2D                                        | 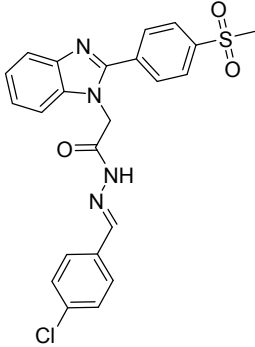 <p>(<i>E</i>)-<i>N'</i>-(4-chlorobenzylidene)-2-(2-(4-(methylsulfonyl)phenyl)-1<i>H</i>-benzo[d]imidazol-1-yl)acetohydrazide</p> |  <p>(<i>Z</i>)-<i>N'</i>-(4-chlorobenzylidene)-2-(2-(4-(methylsulfonyl)phenyl)-1<i>H</i>-benzo[d]imidazol-1-yl)acetohydrazide</p> |
| 3D Minimized                              |                                                                                                                                  |                                                                                                                                  |
| Total Energy                              | 96.170                                                                                                                                                                                                             | 112.180                                                                                                                                                                                                              |
| $E_{\text{Str}}$ (bond stretch energy)    | 4.955                                                                                                                                                                                                              | 4.934                                                                                                                                                                                                                |
| $E_{\text{Ang}}$ (bond angle bend energy) | 10.320                                                                                                                                                                                                             | 10.884                                                                                                                                                                                                               |
| $E_{\text{Stb}}$ (stretch-bend energy)    | 0.276                                                                                                                                                                                                              | 0.354                                                                                                                                                                                                                |
| $E_{\text{Oop}}$ (out-of-plane energy)    | 0.084                                                                                                                                                                                                              | 0.107                                                                                                                                                                                                                |
| $E_{\text{Tor}}$ (torsion energy)         | 3.631                                                                                                                                                                                                              | 12.570                                                                                                                                                                                                               |
| $E_{\text{Vdw}}$ (van der Waals energy)   | 53.254                                                                                                                                                                                                             | 49.306                                                                                                                                                                                                               |
| $E_{\text{Ele}}$ (electrostatics energy)  | 23.650                                                                                                                                                                                                             | 34.026                                                                                                                                                                                                               |

**Table S2:** The values of the total energies of E and Z isomers of compound 11b<sup>a</sup>

$$^a \text{ Total energy} = E_{\text{Str}} + E_{\text{Ang}} + E_{\text{Stb}} + E_{\text{Oop}} + E_{\text{Tor}} + E_{\text{Vdw}} + E_{\text{Ele}}$$

**Table S3:** Ulcer index, ulcer number, and preventive index of the most potent AI Compounds and relative ulcerogenicity to reference drugs indomethacin and celecoxib.

| Group Name                          | Ulcer index (mm) |                   |                | Ulcer number |                   |                | Preventive Index (%)<br>% to normal control |
|-------------------------------------|------------------|-------------------|----------------|--------------|-------------------|----------------|---------------------------------------------|
|                                     | Mean             | % to Indomethacin | % to Celecoxib | Mean         | % to Indomethacin | % to Celecoxib |                                             |
| <b>Normal Control</b>               | 0                | 0                 | 0              | 0            | 0                 | 0              | 100                                         |
| <b>Indomethacin (Ulcer Control)</b> | 13               | 100               | 371.4          | 8            | 100               | 200            |                                             |
| <b>Celecoxib</b>                    | 3.5              | 26.9              | 100            | 4            | 50                | 100            | 73.0                                        |
| <b>11b</b>                          | 0.83             | 6.3               | 23.7           | 1            | 12.5              | 25             | 93.5                                        |
| <b>12d</b>                          | 1                | 7.6               | 28.5           | 0.33         | 4.1               | 8.2            | 92.3                                        |
| <b>11k</b>                          | 4.5              | 34.6              | 128.5          | 2.67         | 33.3              | 66.7           | 65.3                                        |

| Compound         | Affinity<br>Kcal/mol | Distance (in Å) from main residue |        | Functional<br>Group                | Interaction |
|------------------|----------------------|-----------------------------------|--------|------------------------------------|-------------|
| <b>Celecoxib</b> | -17.6675             | 3.76                              | Ser353 | Diazole ring                       | pi-H        |
|                  |                      | 2.84                              | Arg120 | -SO <sub>2</sub> NH <sub>2</sub> - | H-acceptor  |
| <b>11b</b>       | -16.9546             | 4.09                              | Ala527 | Diazole ring                       | pi-H        |
|                  |                      | 3.26                              | Arg120 | -SO <sub>2</sub> CH <sub>3</sub>   | H-acceptor  |
| <b>12b</b>       | -15.3202             | 4.04                              | Ala527 | Diazole ring                       | pi-H        |

**Table S4:** Data of molecular modeling for test compounds, and Celecoxib obtained by docking in COX-2(PDB ID: 1CX2) active site.

|            |          |      |        |                                    |            |              |
|------------|----------|------|--------|------------------------------------|------------|--------------|
|            |          | 3.18 | Ser353 | =N-NH                              | H-acceptor |              |
|            |          | 3.28 | Arg120 | -SO <sub>2</sub> CH <sub>3</sub>   | H-acceptor |              |
| <b>11c</b> | -13.3881 | 4.36 | Gly526 | Ph-ring                            | pi-H       |              |
|            |          | 3.26 | Arg120 | -SO <sub>2</sub> CH <sub>3</sub>   | H-acceptor |              |
| <b>11f</b> | -12.5111 | 3.27 | Arg120 | -SO <sub>2</sub> CH <sub>3</sub>   | H-acceptor |              |
| <b>11g</b> | -12.1350 | 3.32 | Arg120 | -SO <sub>2</sub> CH <sub>3</sub>   | H-acceptor |              |
| <b>12d</b> | -16.0124 | 4.03 | Ala527 | Diazole ring                       | pi-H       |              |
|            |          | 3.29 | Arg120 | -SO <sub>2</sub> CH <sub>3</sub>   | H-acceptor |              |
| <b>11j</b> | -13.4163 | 3.75 | Ala527 | Diazole ring                       | pi-H       |              |
|            |          | 3.31 | Arg120 | -SO <sub>2</sub> CH <sub>3</sub> - | H-acceptor |              |
| <b>11k</b> | -16.1407 | 4.17 | Gly526 | Benzo-moiety                       | pi-H       |              |
|            |          | 3.99 | Ala527 | Diazole ring                       | pi-H       |              |
|            |          | 3.30 | Ser353 | =N-NH                              | H-acceptor | <b>Table</b> |
|            |          | 3.29 | Arg120 | -SO <sub>2</sub> CH <sub>3</sub>   | H-acceptor |              |

**S5:** Physicochemical properties and lipophilicity of the most active compounds predicted by swissADME software.

| Code       | Lipophilicity<br>consensus<br>log P | M.W <sup>a</sup><br>g/mol | Rot.<br>bond | Physicochemical properties |                |                 |                                        | %ABS <sup>d</sup> |
|------------|-------------------------------------|---------------------------|--------------|----------------------------|----------------|-----------------|----------------------------------------|-------------------|
|            |                                     |                           |              | H-bond<br>acc.             | H-bond<br>don. | MR <sup>b</sup> | TPSA <sup>c</sup><br>(Å <sup>2</sup> ) |                   |
| <b>11a</b> | 3.24                                | 432.49                    | 7            | 5                          | 1              | 120.31          | 101.80                                 | 73.879            |
| <b>11b</b> | 3.81                                | 466.94                    | 7            | 5                          | 1              | 125.32          | 101.80                                 | 73.879            |
| <b>11c</b> | 3.29                                | 462.52                    | 8            | 6                          | 1              | 126.80          | 111.02                                 | 70.6981           |
| <b>11d</b> | 3.57                                | 450.49                    | 7            | 6                          | 1              | 120.27          | 101.80                                 | 73.879            |
| <b>11f</b> | 4.37                                | 501.38                    | 7            | 5                          | 1              | 130.33          | 101.80                                 | 73.879            |
| <b>11g</b> | 3.83                                | 496.97                    | 8            | 6                          | 1              | 131.81          | 111.03                                 | 70.6947           |
| <b>11h</b> | 4.15                                | 484.93                    | 7            | 6                          | 1              | 125.28          | 101.80                                 | 73.879            |
| <b>11j</b> | 4.16                                | 481.97                    | 7            | 5                          | 1              | 139.29          | 101.80                                 | 73.879            |
| <b>11k</b> | 3.61                                | 476.55                    | 8            | 6                          | 1              | 131.77          | 111.03                                 | 70.6947           |
| <b>11l</b> | 3.94                                | 464.51                    | 7            | 6                          | 1              | 125.24          | 101.80                                 | 73.879            |
| <b>12a</b> | 3.58                                | 446.52                    | 7            | 5                          | 1              | 125.12          | 101.80                                 | 73.879            |
| <b>12b</b> | 4.06                                | 480.97                    | 7            | 5                          | 1              | 130.13          | 101.80                                 | 73.879            |
| <b>12d</b> | 4.64                                | 515.42                    | 7            | 5                          | 1              | 135.41          | 104.80                                 | 72.844            |
| <b>12f</b> | 4.45                                | 494.99                    | 7            | 5                          | 1              | 135.10          | 101.80                                 | 73.879            |

Abbreviation: <sup>a</sup>MW, molecular weight; <sup>b</sup>MR, molar refractivity; <sup>c</sup>TPSA, topological polar surface; <sup>d</sup>%ABS: percentage of absorption

| Property            |                                                        | Compounds |        |        |        |        |
|---------------------|--------------------------------------------------------|-----------|--------|--------|--------|--------|
|                     |                                                        | celecoxib | 11b    | 11k    | 12b    | 12d    |
| <b>Absorption</b>   | Water solubility (log mol/L)                           | -3.61     | -2.893 | -2.894 | -2.893 | -2.894 |
|                     | Caco2 permeability (log Papp in 10 <sup>-6</sup> cm/s) | 1.067     | 0.795  | 0.725  | 0.743  | 0.642  |
|                     | Intestinal absorption (% Absorbed)                     | 93.126    | 97.683 | 93.231 | 98.485 | 99.577 |
|                     | Skin Permeability (log Kp)                             | -2.755    | -2.735 | -2.735 | -2.735 | -2.735 |
|                     | P-glycoprotein substrate                               | yes       | Yes    | Yes    | Yes    | Yes    |
|                     | P-glycoprotein I inhibitor                             | no        | Yes    | Yes    | Yes    | Yes    |
|                     | P-glycoprotein II inhibitor                            | yes       | Yes    | Yes    | Yes    | Yes    |
| <b>Distribution</b> | VDss (human) (log L/kg)                                | 0.095     | -0.297 | -0.412 | -0.304 | -0.322 |
|                     | Fraction unbound (Fu)                                  | 0.125     | 0.212  | 0.203  | 0.207  | 0.198  |
|                     | BBB permeability (log BB)                              | -0.952    | -0.373 | -0.474 | -0.371 | -0.594 |
|                     | CNS permeability (log PS)                              | -2.086    | -2.169 | -2.374 | -2.083 | -1.963 |
| <b>Metabolism</b>   | CYP3A4 substrate                                       | yes       | Yes    | Yes    | Yes    | Yes    |
|                     | CYP2C19 inhibitor                                      | Yes       | Yes    | Yes    | Yes    | Yes    |

**Table S6:** ADME data of the target synthesized compounds predicted using pkCSM software.

|                  |                                        |       |        |        |        |        |
|------------------|----------------------------------------|-------|--------|--------|--------|--------|
|                  | CYP2C9 inhibitor                       | Yes   | Yes    | Yes    | Yes    | Yes    |
|                  | CYP3A4 inhibitor                       | No    | Yes    | Yes    | Yes    | Yes    |
| <b>Excretion</b> | Total Clearance (log ml/min/kg)        | 0.472 | 0.528  | 0.614  | 0.518  | 0.45   |
|                  | Renal OCT2 substrate                   | Yes   | Yes    | Yes    | Yes    | Yes    |
|                  | Max. tolerated dose (log mg/kg/day)    | 0.163 | -0.232 | -0.271 | -0.26  | -0.282 |
|                  | hERG I inhibitor                       | No    | No     | No     | Yes    | No     |
|                  | hERG II inhibitor                      | No    | Yes    | Yes    | Yes    | Yes    |
|                  | Hepatotoxicity                         | Yes   | No     | No     | No     | No     |
|                  | Skin Sensitisation                     | No    | No     | No     | No     | No     |
|                  | <i>T.Pyriformis</i> toxicity(log ug/L) | 0.429 | 0.285  | 0.285  | 0.285  | 0.285  |
|                  | Minnow toxicity (log mM)               | 0.658 | -1.695 | -1.878 | -2.167 | -2.746 |

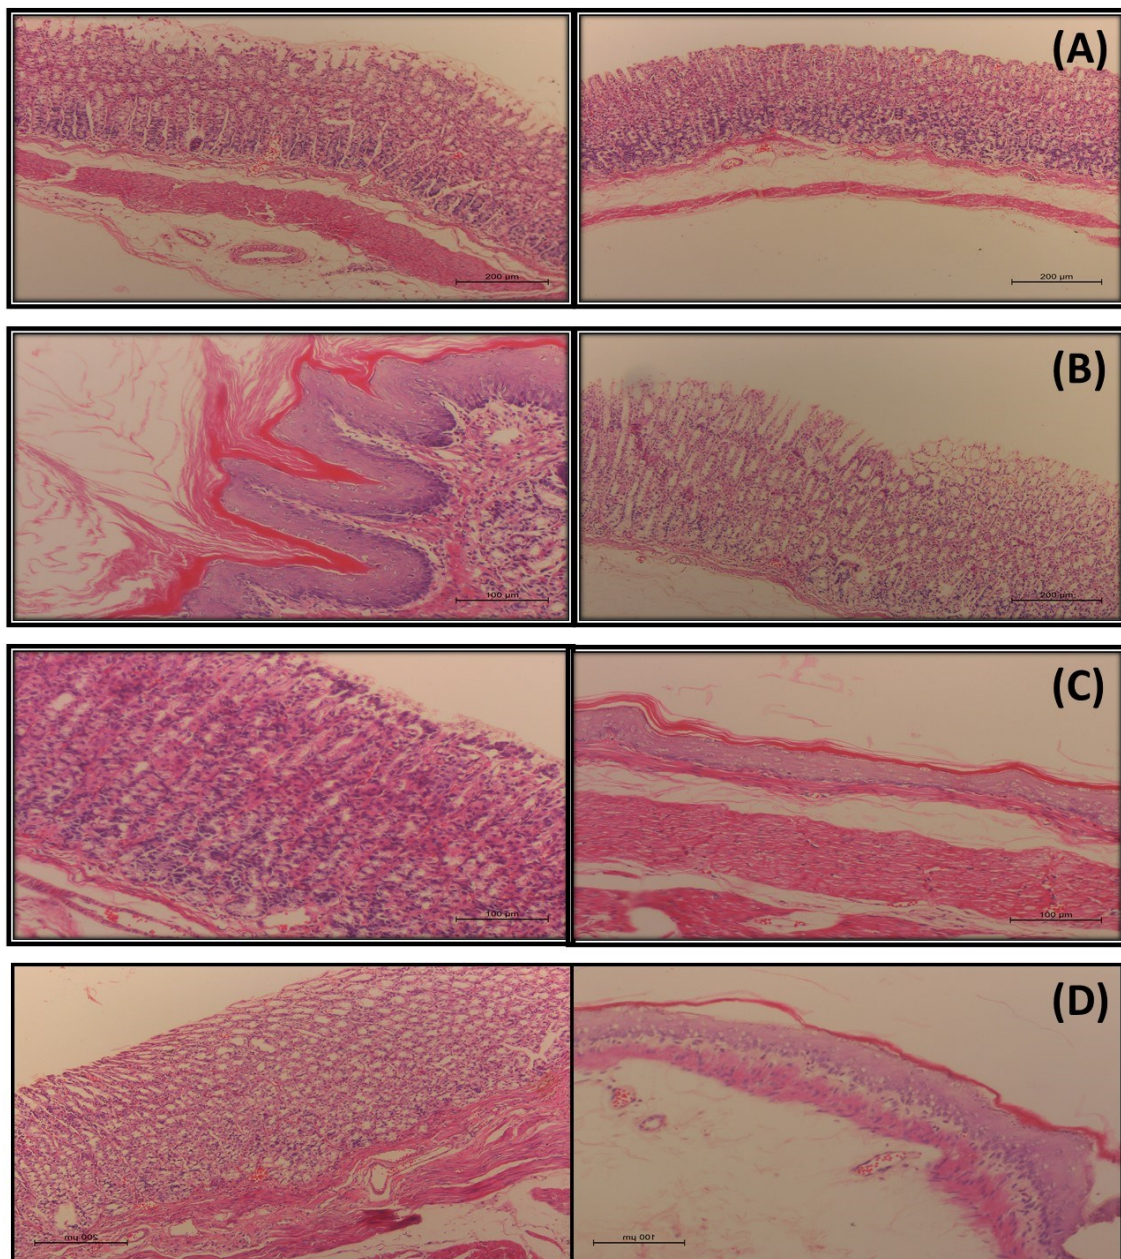



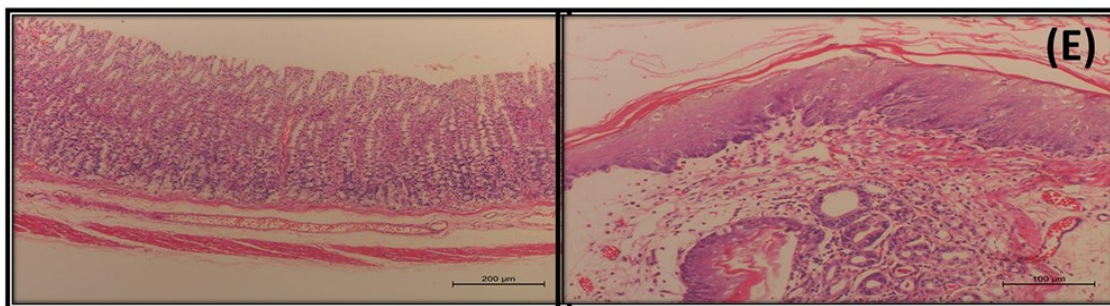

**Figure. S1:** Histopathological examination of gastric mucosa (A) for negative control group (B) for indomethacin (C) for celecoxib (D) for compounds **11b** and **12d** (E) for compound **11k**.

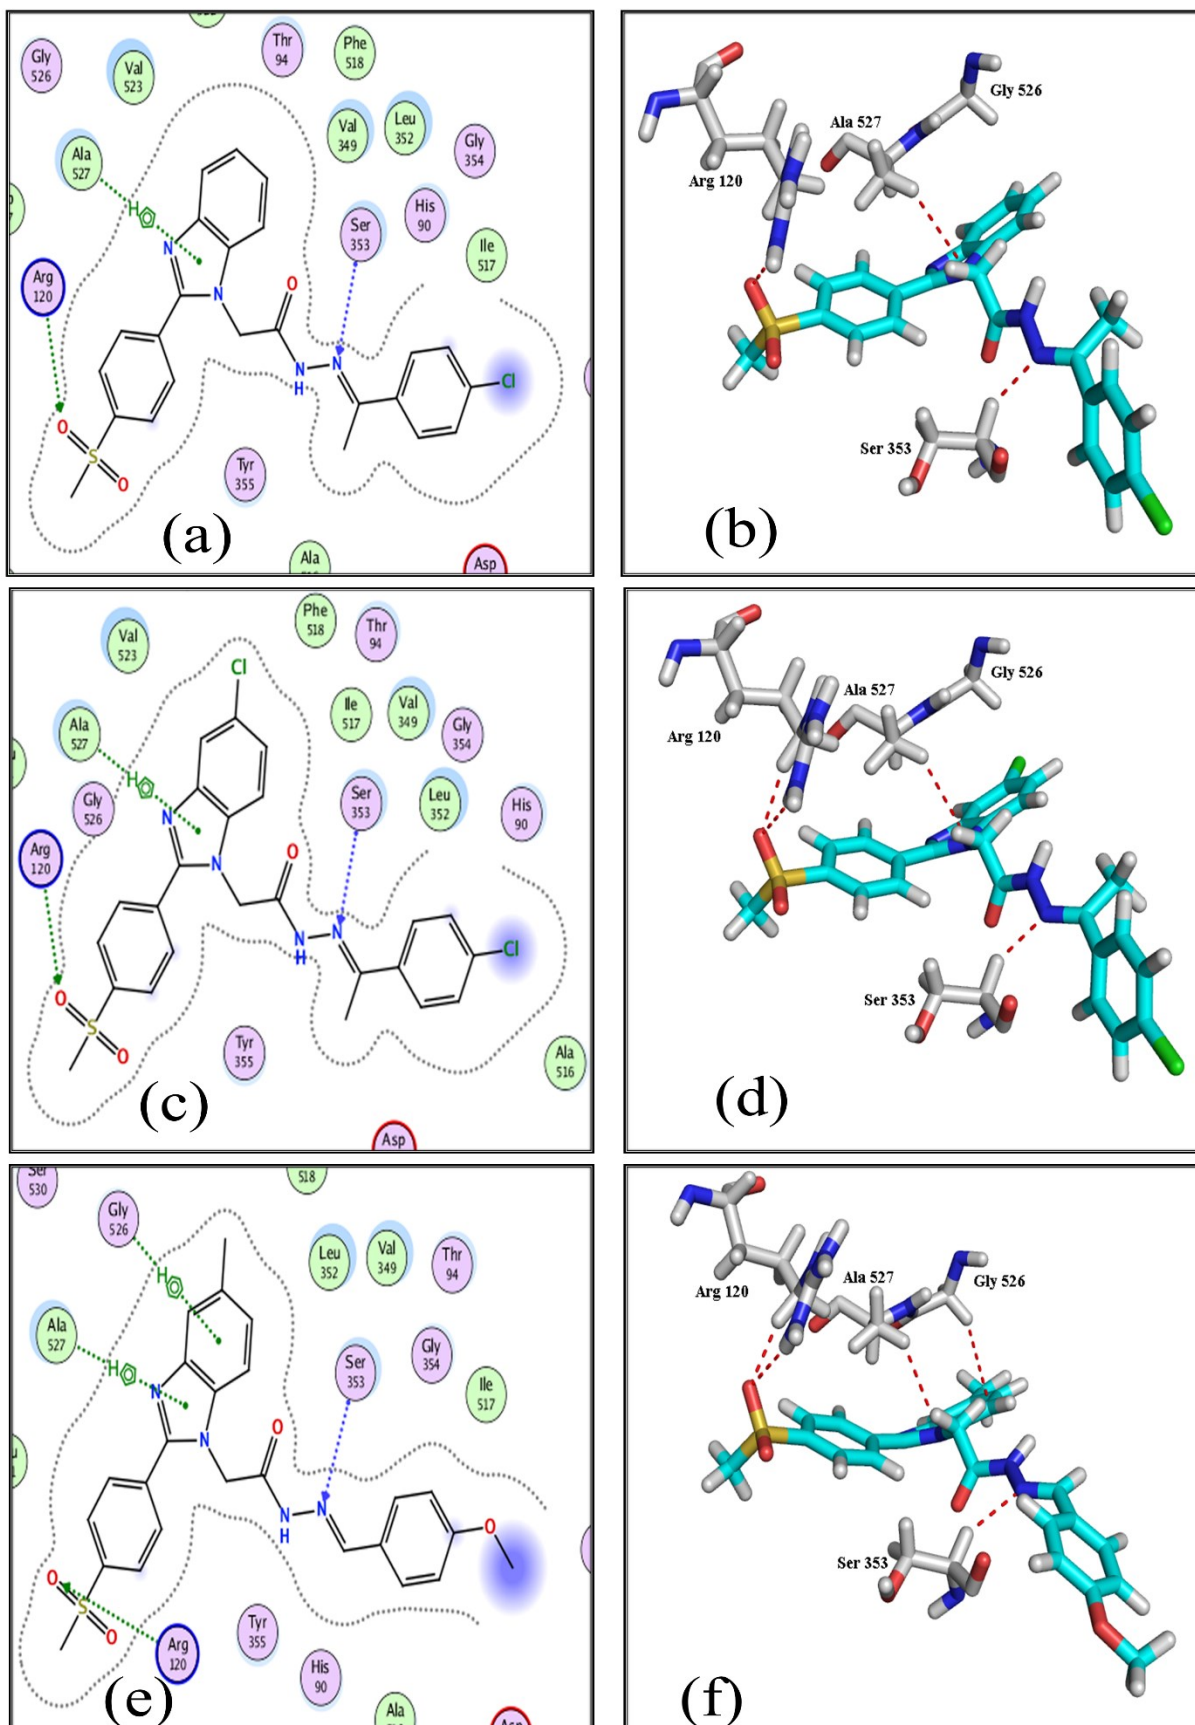

Figure S2: 2D and 3D interaction of compound 12b (a) and (b) compound 12d (c) and (d) compound 11k (e) and (f)

# 1. <sup>1</sup>H Spectra of 7a:

A-1  
proton\_su DMSO (C:\nmr-data) Student 9

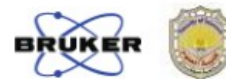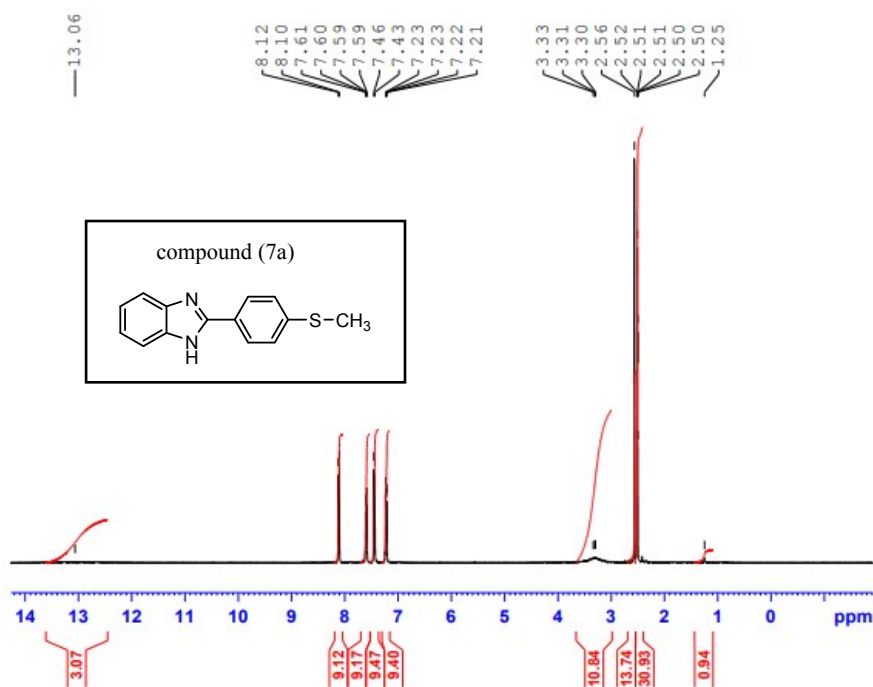

Current Data Parameters  
NAME Feb17-2018  
EXPNO 100  
PROCNO 1

F2 - Acquisition Parameters  
Date\_ 20180217  
Time\_ 11.30  
INSTRUM spect  
PROBHD 5 mm PABBO BB/  
PULPROG zg30  
TD 65536  
SOLVENT DMSO  
NS 60  
DS 2  
SWH 8012.820 Hz  
FIDRES 0.122266 Hz  
AQ 4.089445 sec  
RG 199.04  
DW 62.400 usec  
DE 6.50 usec  
TE 308.2 K  
D1 1.0000000 sec  
TDO 1

----- CHANNEL f1 -----  
SF01 400.1324710 MHz  
NUC1 1H  
P1 12.00 usec  
PLM1 22.00000000 W

F2 - Processing parameters  
SI 65536  
SF 400.1300000 MHz  
WDW EM  
SSB 0  
LB 0.30 Hz  
GB 0  
PC 1.00

Act  
Go t

A-1  
proton\_su DMSO (C:\nmr-data) Student 9

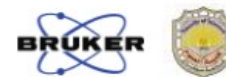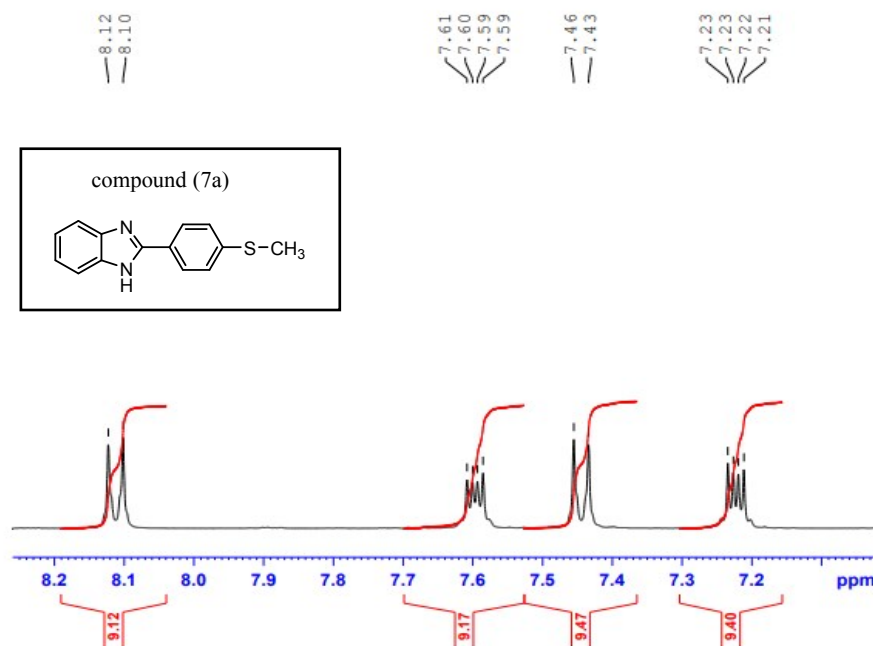

Current Data Parameters  
NAME Feb17-2018  
EXPNO 100  
PROCNO 1

F2 - Acquisition Parameters  
Date\_ 20180217  
Time\_ 11.30  
INSTRUM spect  
PROBHD 5 mm PABBO BB/  
PULPROG zg30  
TD 65536  
SOLVENT DMSO  
NS 60  
DS 2  
SWH 8012.820 Hz  
FIDRES 0.122266 Hz  
AQ 4.0894455 sec  
RG 199.04  
DW 62.400 usec  
DE 6.50 usec  
TE 308.2 K  
D1 1.0000000 sec  
TDO 1

----- CHANNEL f1 -----  
SF01 400.1324710 MHz  
NUC1 1H  
P1 12.00 usec  
PLM1 22.00000000 W

F2 - Processing parameters  
SI 65536  
SF 400.1300000 MHz  
WDW EM  
SSB 0  
LB 0.30 Hz  
GB 0  
PC 1.00

Act  
Go t

A-1  
D2O  
proton\_su DMSO [C:\nmr-data] Student 5

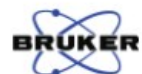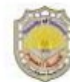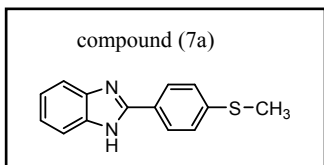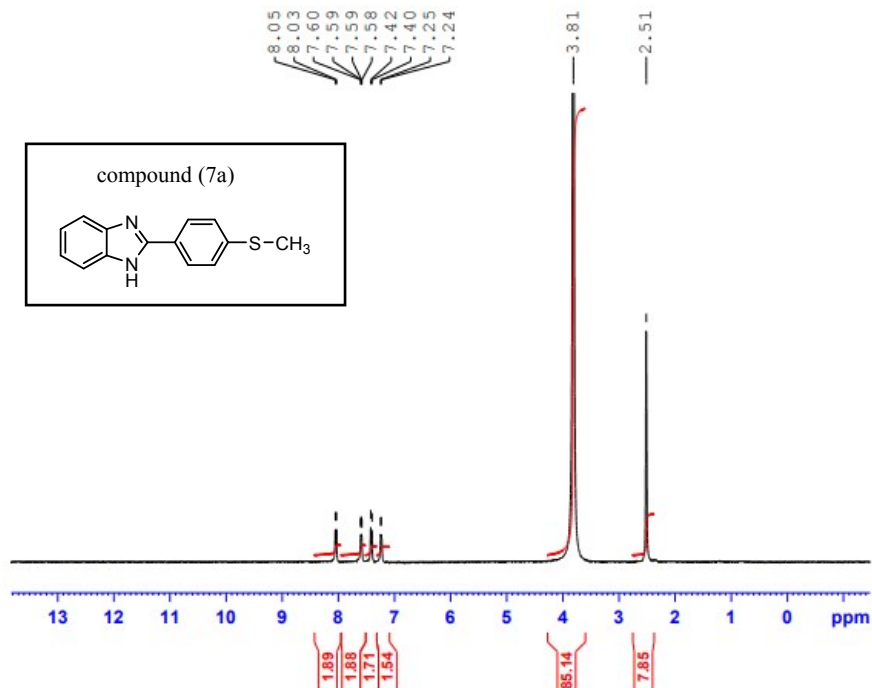

Current Data Parameters  
NAME Feb25-2018  
EXPNO 90  
PROCNO 1

F2 - Acquisition Parameters  
Date\_ 20180225  
Time 19.45  
INSTRUM spect  
PROBHD 5 mm PABBO BB/  
PULPROG zg30  
TD 65536  
SOLVENT DMSO  
NS 20  
DS 2  
SWH 8012.820 Hz  
FIDRES 0.122266 Hz  
AQ 4.089465 sec  
RG 175.84  
DW 62.400 usec  
DE 6.50 usec  
TE 308.2 K  
D1 1.0000000 sec  
TDO 1

----- CHANNEL f1 -----  
SF01 400.1324710 MHz  
NUC1 1H  
P1 12.00 usec  
PLM1 22.00000000 W

F2 - Processing parameters  
SI 65536  
SF 400.1300000 MHz  
WDW EM  
SSB 0  
LB 0.30 Hz  
GB 0  
PC 1.00

Act  
Go to

## 2. <sup>1</sup>H Spectra of 7b:

EX-M.ABOALHASSAN-A2  
 PROTON\_BSU DMSO (C:\data) aber 20

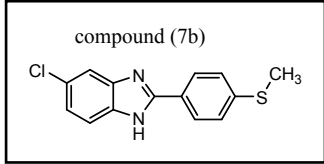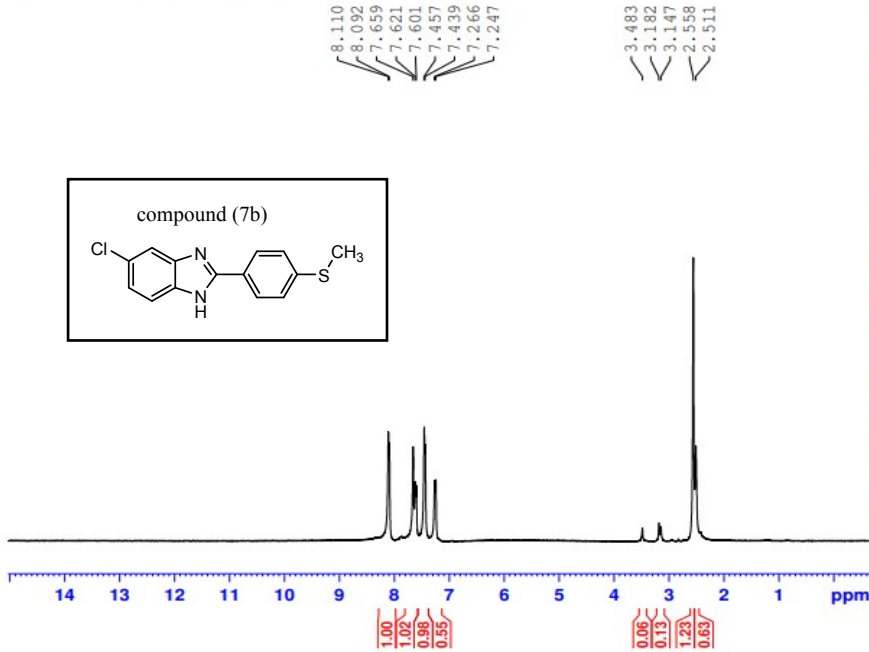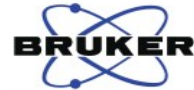

Current Data Parameters  
 NAME May03-2018-aber  
 EXPNO 40  
 PROCNO 1

F2 - Acquisition Parameters  
 Date\_ 20180503  
 Time 9.44  
 INSTRUM spect  
 PROBHD 5 mm PABBO BB/  
 PULPROG zg30  
 TD 65536  
 SOLVENT DMSO  
 NS 16  
 DS 2  
 SWH 8012.820 Hz  
 FIDRES 0.122266 Hz  
 AQC 4.0894465 sec  
 RG 147.93  
 DW 62.400 usec  
 DE 6.50 usec  
 TE 298.2 K  
 D1 1.00000000 sec  
 TDO 1

==== CHANNEL f1 =====  
 SFO1 400.1324710 MHz  
 NUC1 1H  
 P1 10.00 usec  
 PLW1 16.00000000 W

F2 - Processing parameters  
 SI 65536  
 SF 400.1300000 MHz  
 WDW EM  
 SSB 0  
 LB 0.10 Hz  
 GB 0  
 PC 1.00

Active  
 Go to S

EX-M.ABOALHASSAN-A2  
 PROTON\_BSU DMSO (C:\data) aber 20

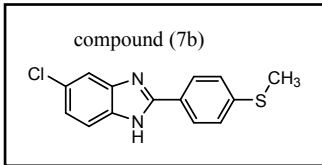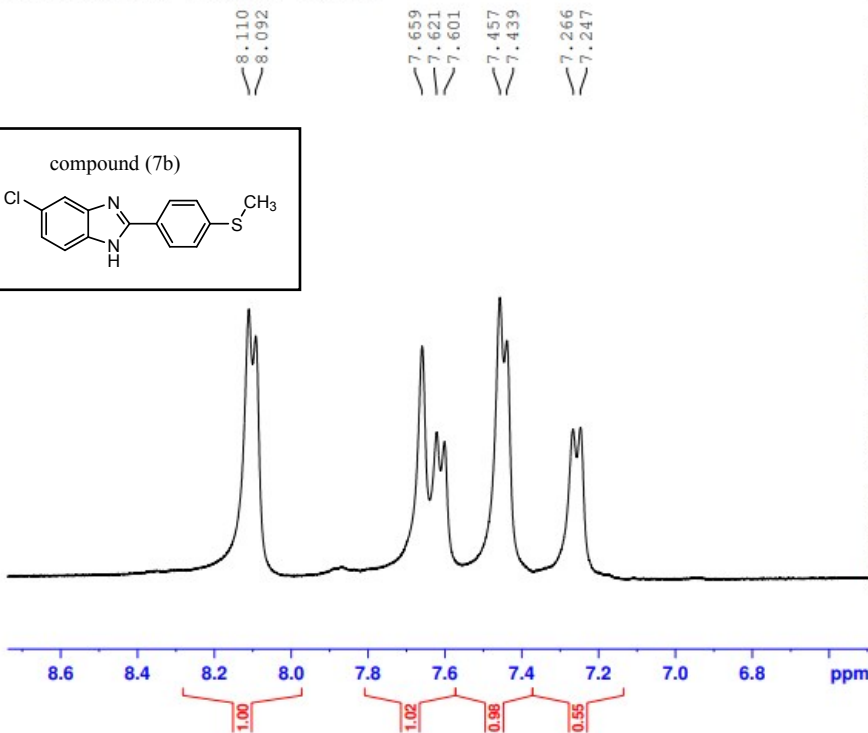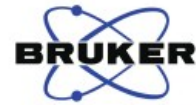

Current Data Parameters  
 NAME May03-2018-aber  
 EXPNO 40  
 PROCNO 1

F2 - Acquisition Parameters  
 Date\_ 20180503  
 Time 9.44  
 INSTRUM spect  
 PROBHD 5 mm PABBO BB/  
 PULPROG zg30  
 TD 65536  
 SOLVENT DMSO  
 NS 16  
 DS 2  
 SWH 8012.820 Hz  
 FIDRES 0.122266 Hz  
 AQC 4.0894465 sec  
 RG 147.93  
 DW 62.400 usec  
 DE 6.50 usec  
 TE 298.2 K  
 D1 1.00000000 sec  
 TDO 1

==== CHANNEL f1 =====  
 SFO1 400.1324710 MHz  
 NUC1 1H  
 P1 10.00 usec  
 PLW1 16.00000000 W

F2 - Processing parameters  
 SI 65536  
 SF 400.1300000 MHz  
 WDW EM  
 SSB 0  
 LB 0.10 Hz  
 GB 0  
 PC 1.00

Act  
 Got

### 3. <sup>1</sup>H Spectra of 7c:

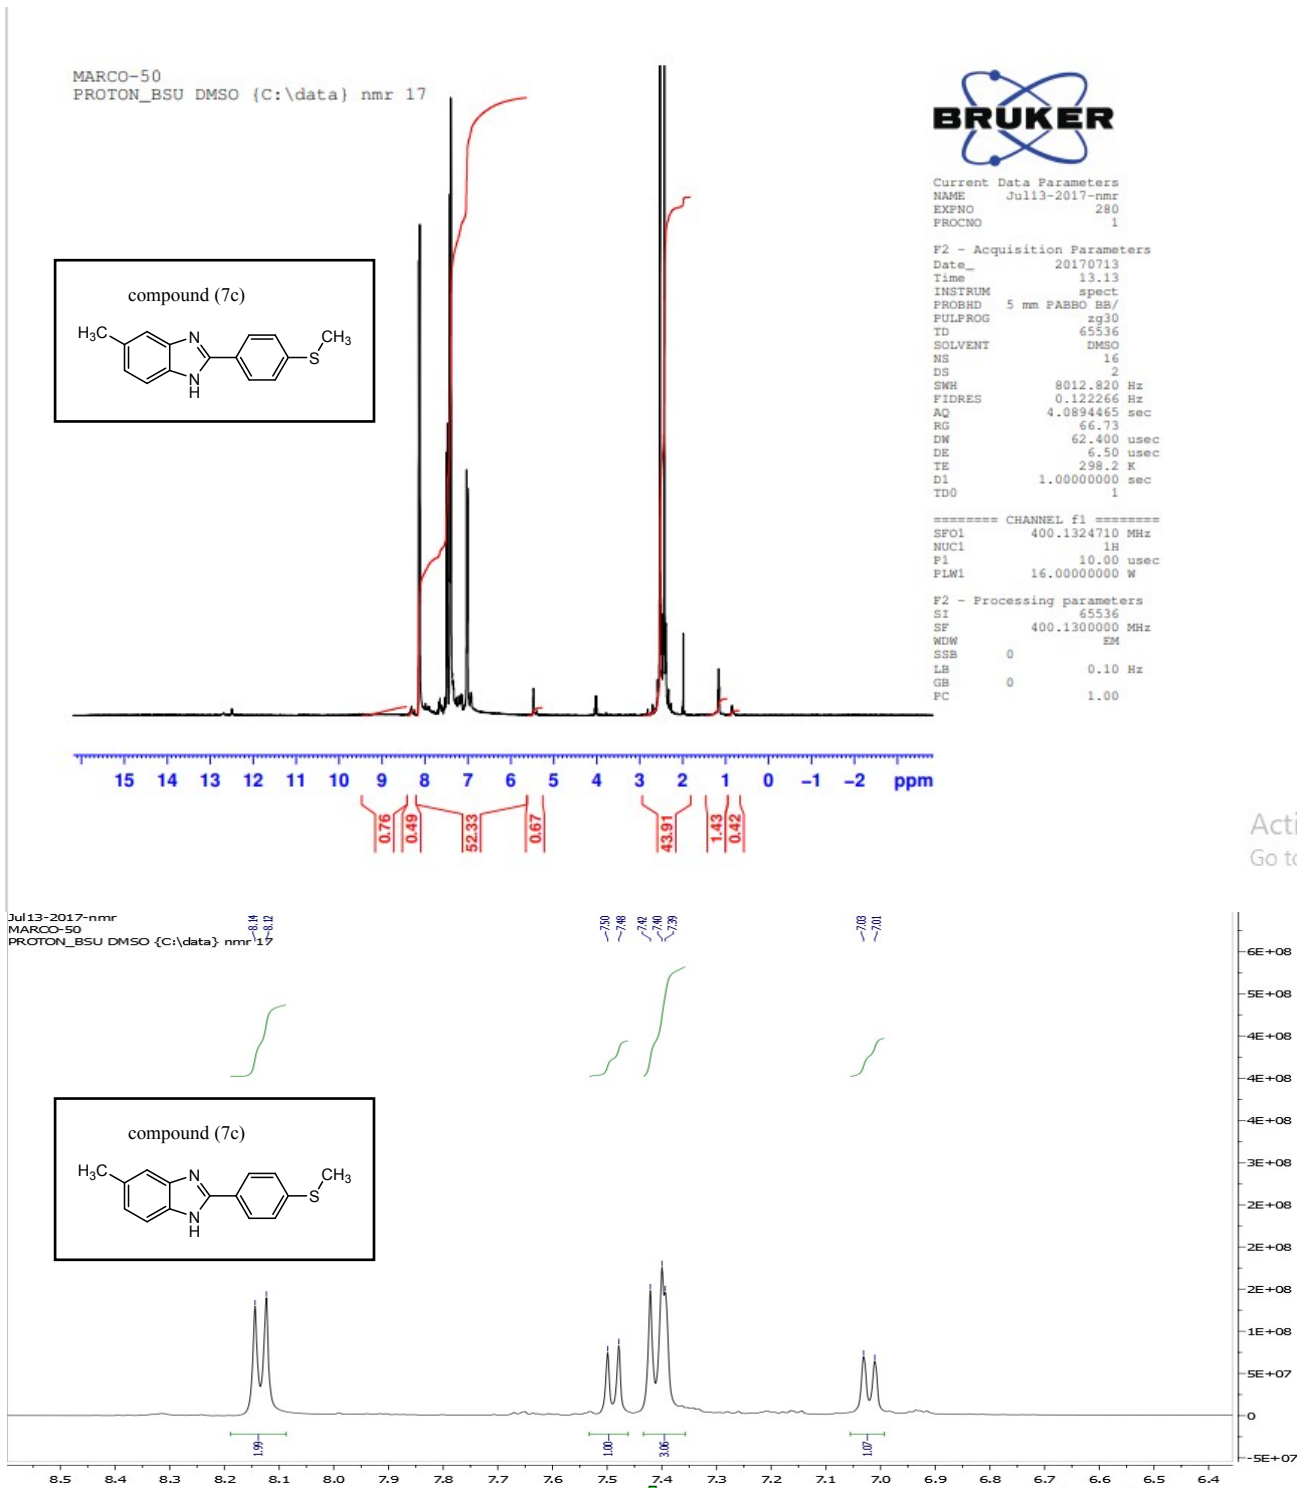



#### 4. <sup>1</sup>H Spectra of 8a:

EX-M.ABOALHASSAN-B1  
 PROTON\_BSU DMSO {C:\data} abeer 18

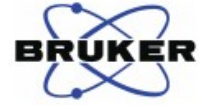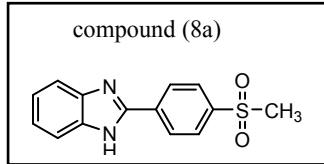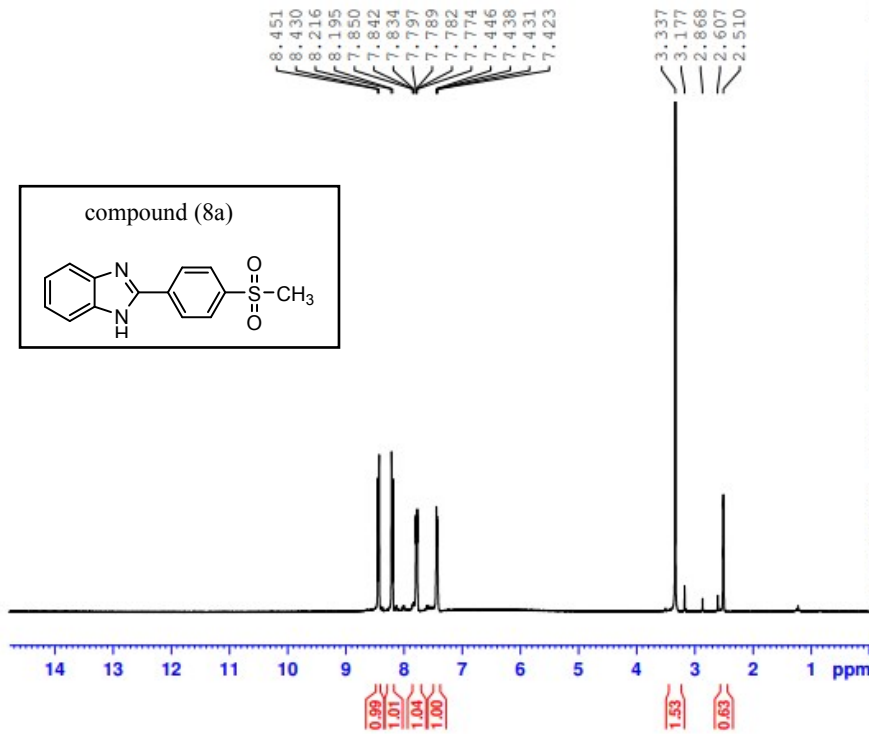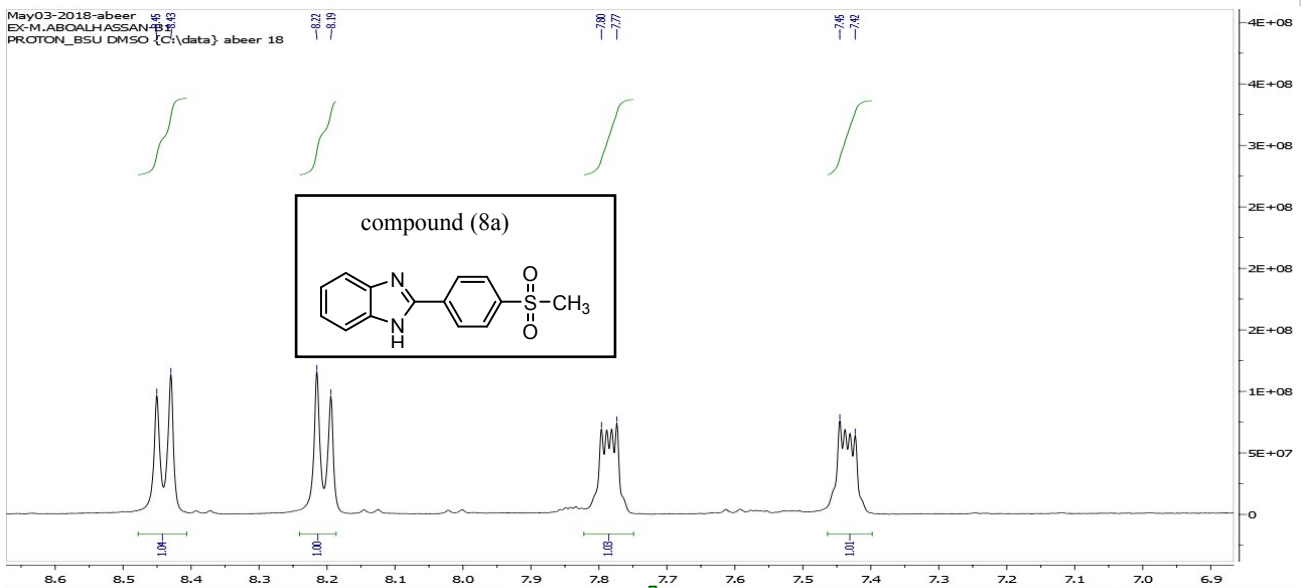

## 5. <sup>1</sup>H Spectra of 8b:

B-2  
proton\_su DMSO (C:\nmr-data) Student 20

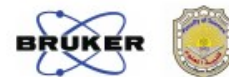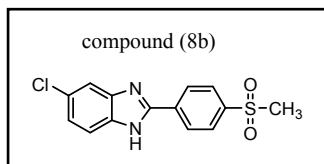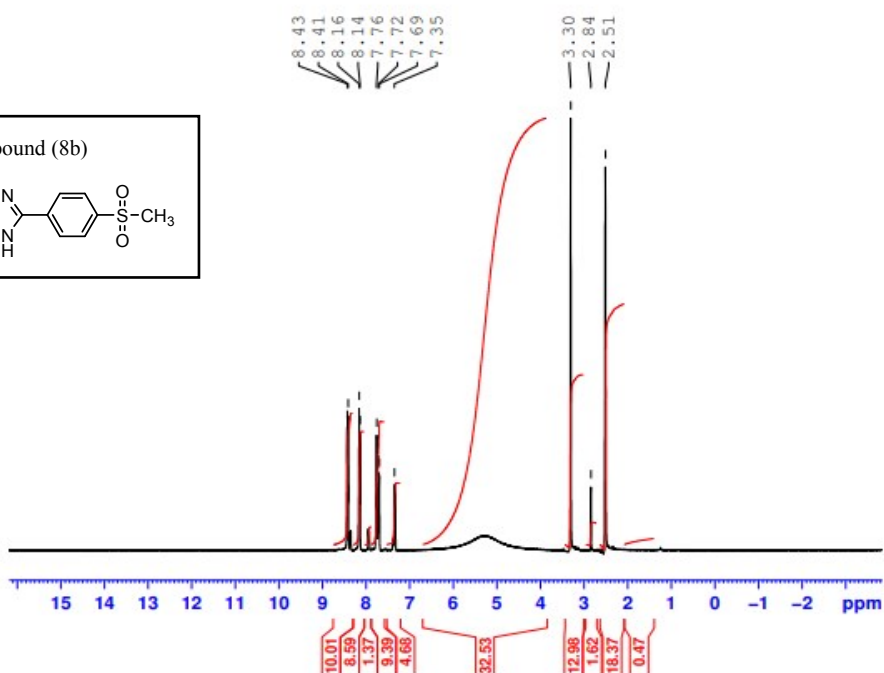

```

Current Data Parameters
NAME      Jul22-2019
EXPNO    100
PROCNO   1

F2 - Acquisition Parameters
Date_    20190722
Time     13.13
INSTRUM  spect
PROBHD   5 mm PABBO BB/
PULPROG  zg30
TD        65536
SOLVENT  DMSO
NS        30
DS        2
SWH       8012.820 Hz
FIDRES    0.122266 Hz
AQ        4.0894465 sec
RG        199.04
DW        62.400 usec
DE        6.50 usec
TE        308.1 K
D1        1.0000000 sec
TDO       1

----- CHANNEL f1 -----
SFO1     400.1324710 MHz
NUC1     1H
P1       12.00 usec
PLW1     22.00000000 W

F2 - Processing parameters
SI        65536
SF        400.1300000 MHz
WDW       EM
SSB       0
LB        0.30 Hz
GB        0
PC        1.00
    
```



## 6. <sup>1</sup>H Spectra of 8c:

ex-m.aboalhassan-B3  
 PROTON\_BSU DMSO {C:\data} abeer 17

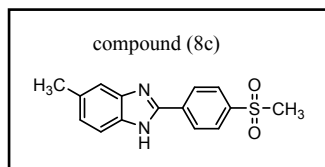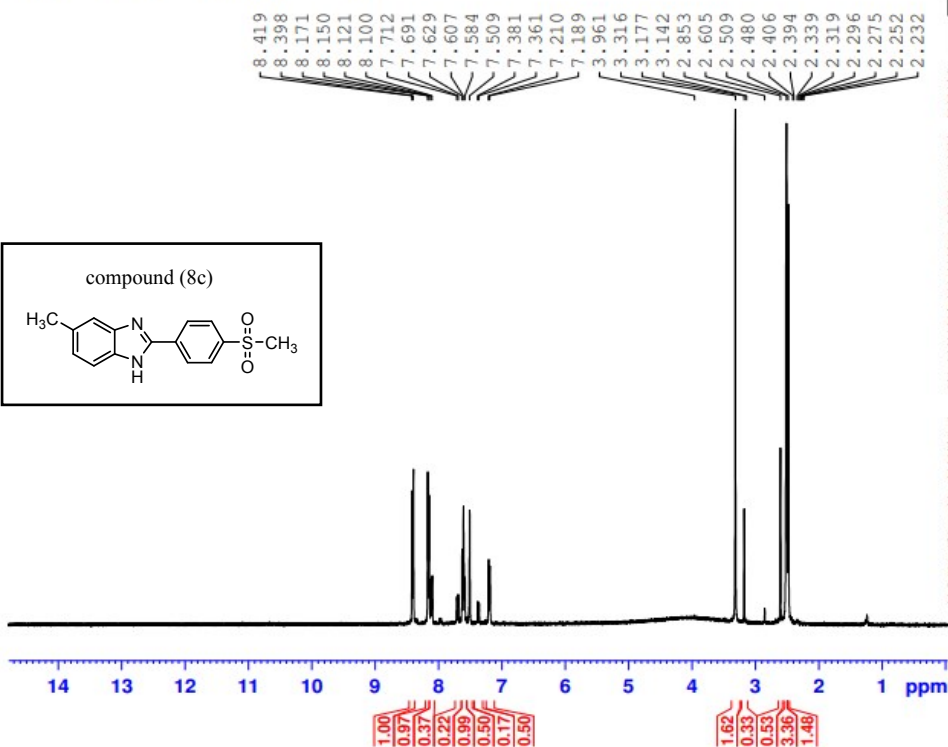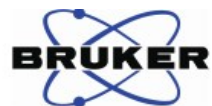

Current Data Parameters  
 NAME May03-2018-abeer  
 EXPNO 10  
 PROCNO 1

F2 - Acquisition Parameters  
 Date\_ 20180503  
 Time 9.33  
 INSTRUM spect  
 PROBHD 5 mm PABBO BB/  
 PULPROG zg30  
 TD 65536  
 SOLVENT DMSO  
 NS 16  
 DS 2  
 SWH 8012.820 Hz  
 FIDRES 0.122266 Hz  
 AQ 4.0894465 sec  
 RG 147.93  
 DW 62.400 usec  
 DE 6.50 usec  
 TE 298.2 K  
 D1 1.00000000 sec  
 TD0 1

===== CHANNEL f1 =====  
 SF01 400.1324710 MHz  
 NUC1 1H  
 P1 10.00 usec  
 PLW1 16.00000000 W

F2 - Processing parameters  
 SI 65536  
 SF 400.1300000 MHz  
 WDW EM  
 SSB 0  
 LB 0.10 Hz  
 GB 0  
 PC 1.00

ex-m.aboalhassan-B3  
 PROTON\_BSU DMSO {C:\data} abeer 17

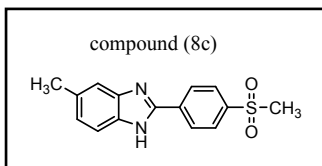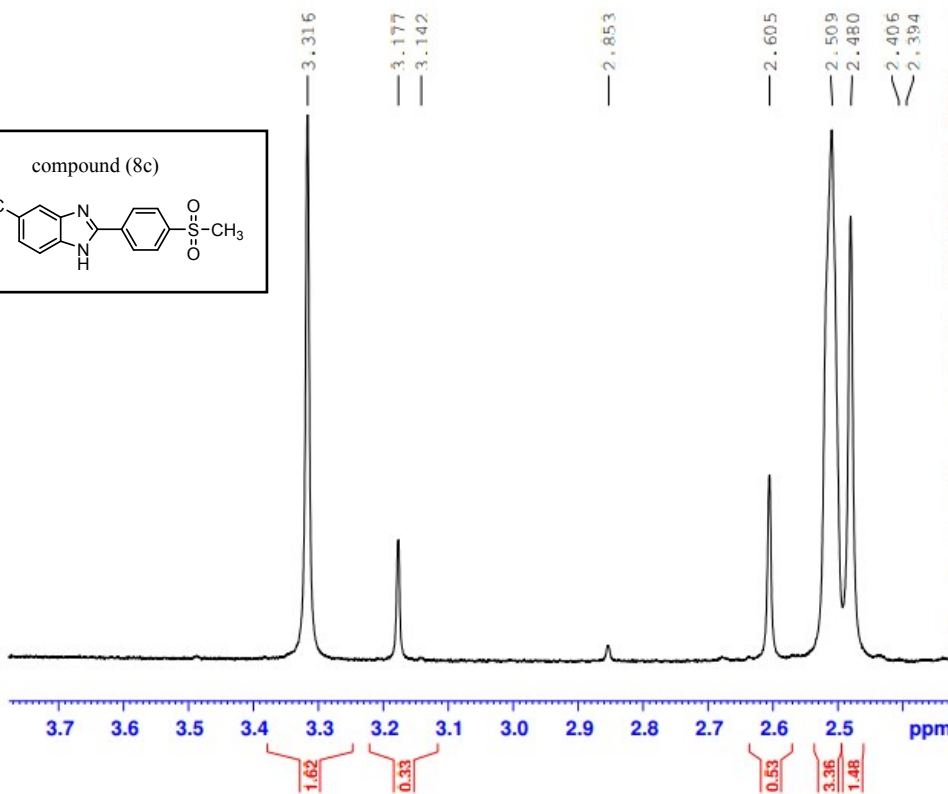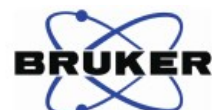

Current Data Parameters  
 NAME May03-2018-abeer  
 EXPNO 10  
 PROCNO 1

F2 - Acquisition Parameters  
 Date\_ 20180503  
 Time 9.33  
 INSTRUM spect  
 PROBHD 5 mm PABBO BB/  
 PULPROG zg30  
 TD 65536  
 SOLVENT DMSO  
 NS 16  
 DS 2  
 SWH 8012.820 Hz  
 FIDRES 0.122266 Hz  
 AQ 4.0894465 sec  
 RG 147.93  
 DW 62.400 usec  
 DE 6.50 usec  
 TE 298.2 K  
 D1 1.00000000 sec  
 TD0 1

===== CHANNEL f1 =====  
 SF01 400.1324710 MHz  
 NUC1 1H  
 P1 10.00 usec  
 PLW1 16.00000000 W

F2 - Processing parameters  
 SI 65536  
 SF 400.1300000 MHz  
 WDW EM  
 SSB 0  
 LB 0.10 Hz  
 GB 0  
 PC 1.00

ex-m.aboalhassan-B3  
PROTON\_BSU DMSO (C:\data) abeer 17

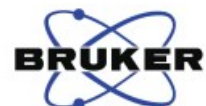

Current Data Parameters  
NAME May03-2018-abeer  
EXPNO 10  
PROCNO 1

F2 - Acquisition Parameters  
Date\_ 20180503  
Time 9.33  
INSTRUM spect  
PROBHD 5 mm PABBO BB/  
PULPROG zg30  
TD 65536  
SOLVENT DMSO  
NS 16  
DS 2  
SWH 8012.820 Hz  
FIDRES 0.122266 Hz  
AQ 4.0894465 sec  
RG 147.93  
DM 62.400 usec  
DE 6.50 usec  
TE 298.2 K  
D1 1.00000000 sec  
TD0 1

==== CHANNEL f1 =====  
SFO1 400.1324710 MHz  
NUC1 1H  
P1 10.00 usec  
PLW1 16.00000000 W

F2 - Processing parameters  
SI 65536  
SF 400.1300000 MHz  
WDW EM  
SSB 0  
LB 0.10 Hz  
GB 0  
PC 1.00

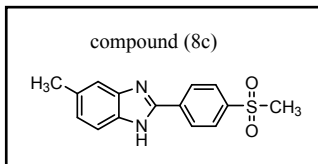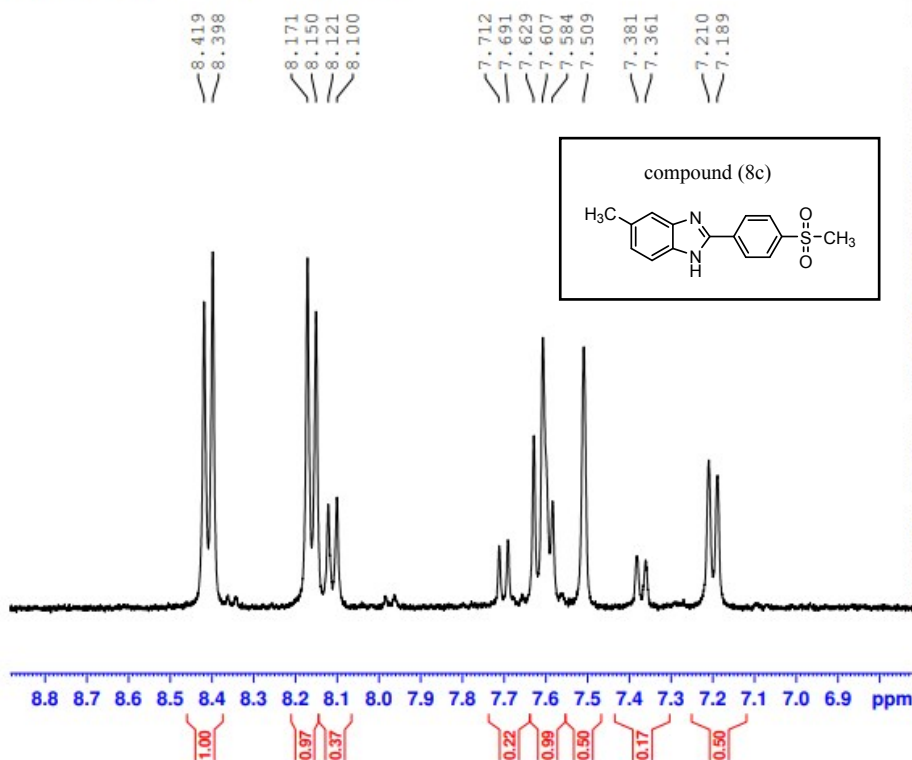

## 7. <sup>1</sup>H and <sup>13</sup>C NMR Spectra of 9a:

Martha Moheb-C1-AS-proton

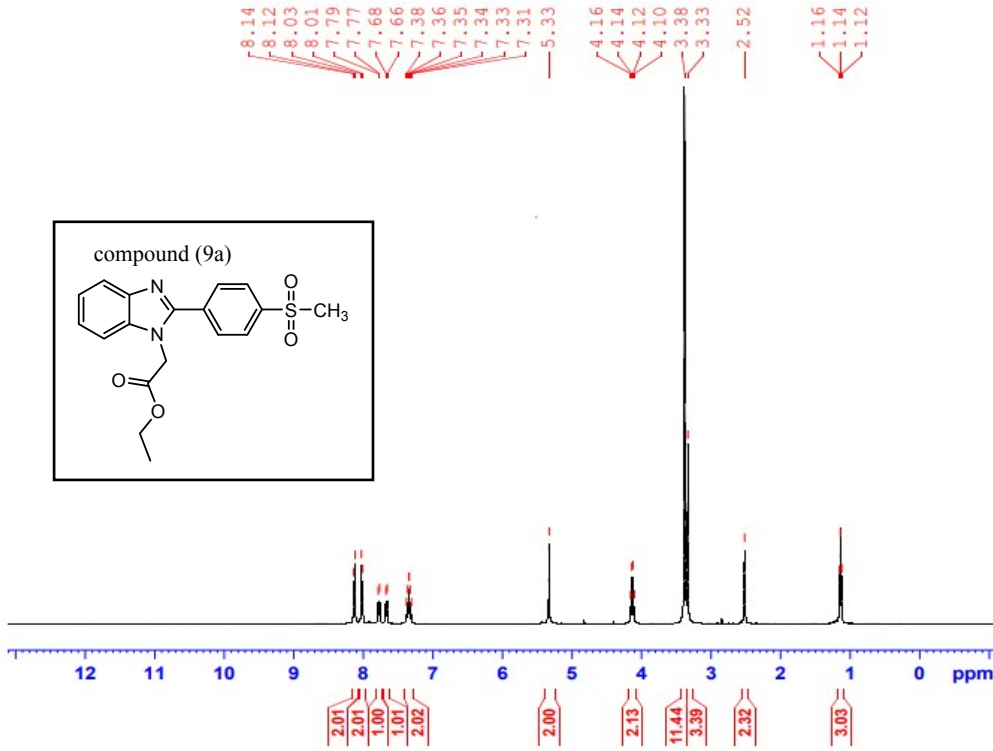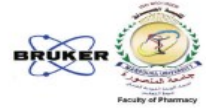

```

Current Data Parameters
NAME      Martha Moheb-C1-AS-pi
EXPNO    10
PROCNO   1

F2 - Acquisition Parameters
Date_    20190915
Time     11.47 h
INSTRUM  spect
PROBHD   zgpg30
PULPROG  zgpg30
TD        65536
SOLVENT  DMSO
NS        16
DS        2
SWH       8012.820 Hz
FIDRES    0.244932 Hz
AQ        4.0894465 sec
RG        158.72
SQ        62.400 usec
DE        6.50 usec
TE        292.6 K
D1        1.00000000 sec
TDO       1
SFO1      400.2024712 MHz
NUC1      1H
P1        13.50 usec
PLM1      13.00000000 W

F2 - Processing parameters
SI        65536
SF        400.2000000 MHz
WDW       EM
SSB       0
LB        0.30 Hz
GB        0
PC        1.00
    
```

Martha Moheb-C1-AS-proton

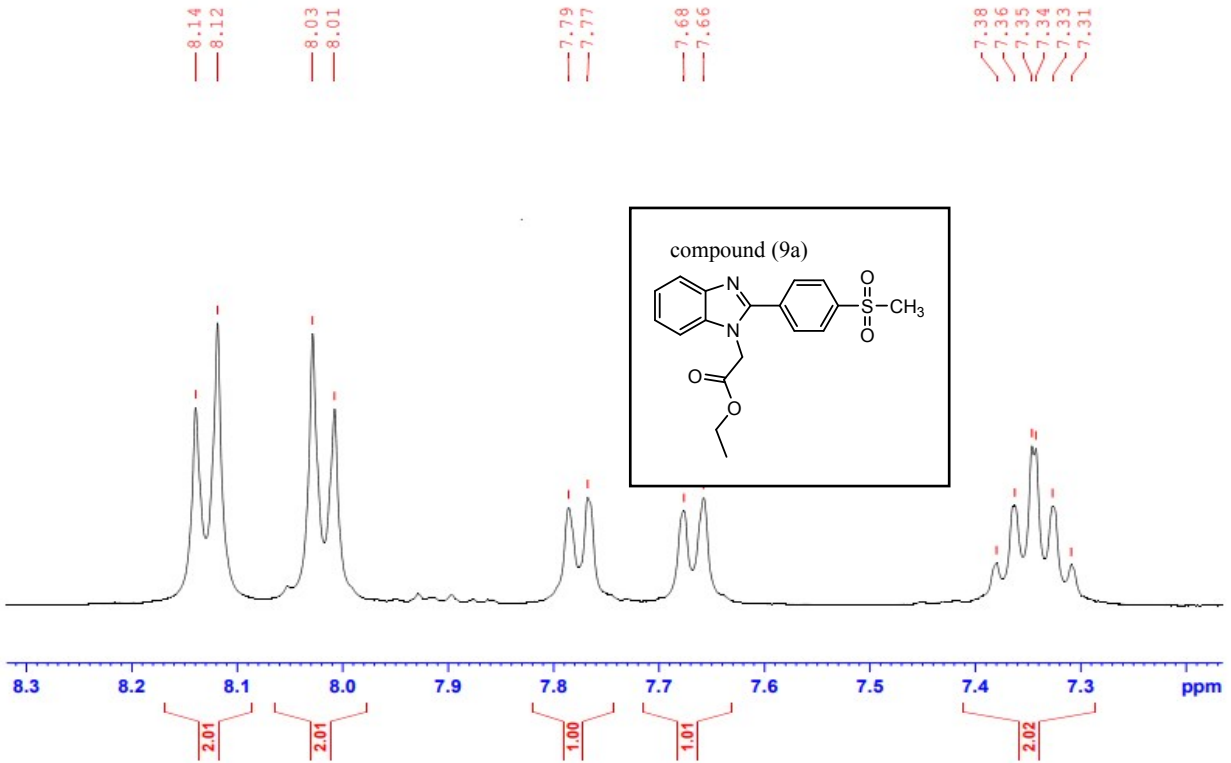

MOHAMED-9A  
C13-BSU DMSO (C:\data) aber 17

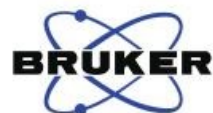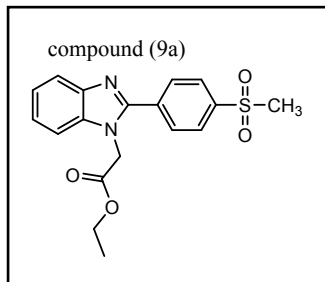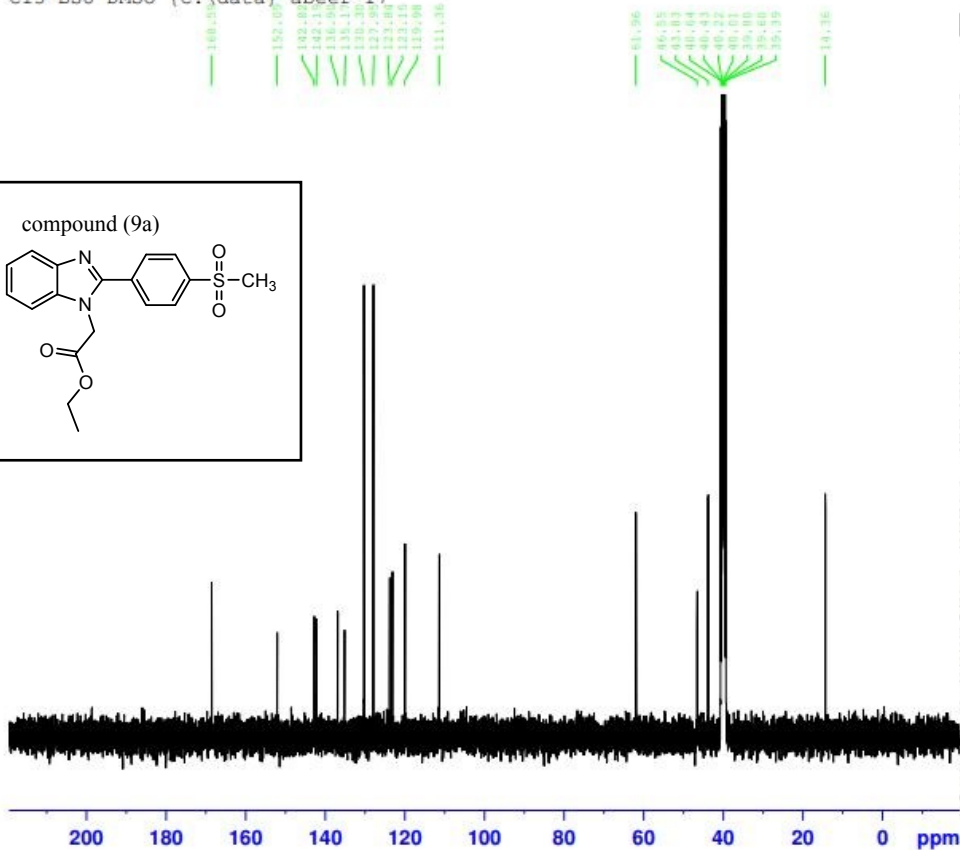

Current Data Parameters  
NAME Jul11-2021-abeer  
EXPNO 110  
PROCNO 1

F2 - Acquisition Parameters  
Date\_ 20210711  
Time 23.16  
INSTRUM spect  
PROBHD 5 mm F4BBO BB/  
PULPROG zgpg30  
TD 65536  
SOLVENT DMSO  
NS 4000  
DS 4  
SWH 24038.461 Hz  
FIDRES 0.366798 Hz  
AQ 1.3631488 sec  
RG 205.44  
DW 20.800 usec  
DE 6.50 usec  
TE 299.1 K  
D1 2.00000000 sec  
D11 0.03000000 sec  
TD0 1

===== CHANNEL f1 =====  
SFO1 100.6228293 MHz  
NUC1 13C  
P1 10.00 usec  
PLW1 66.00000000 W

===== CHANNEL f2 =====  
SFO2 400.1316005 MHz  
NUC2 1H  
CPDPRG[2] waltz16  
PCPD2 90.00 usec  
PLW2 16.00000000 W  
PLW12 0.21777999 W  
PLW13 0.17640001 W

F2 - Processing parameters  
SI 131072  
SF 100.6127690 MHz  
WDW EM  
SSB 0  
LB 1.00 Hz  
GB 0  
PC 1.40





## 9. <sup>1</sup>H and <sup>13</sup>C NMR Spectra of 9c:

Martha Moheb-C3-AS-proton

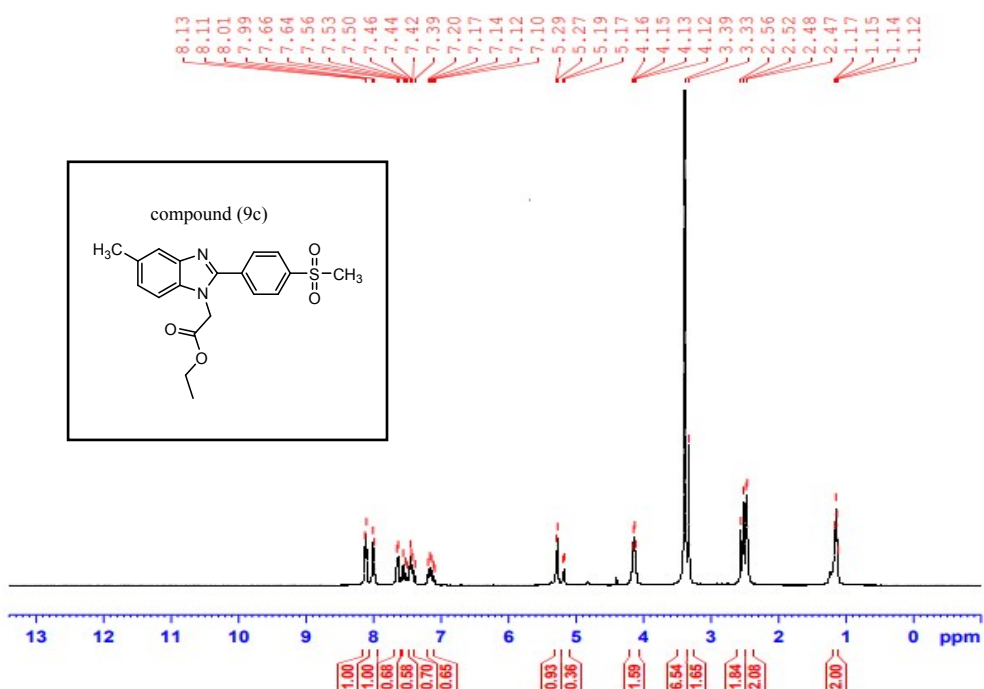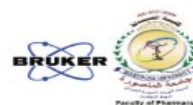

Current Data Parameters  
 NAME Martha Moheb-c3-AS-proton  
 EXPNO 10  
 PROCNO 1

F2 - Acquisition Parameters  
 Date\_ 20190915  
 Time 11.57 h  
 INSTRUM spect  
 PROBHD z108618\_0945 ( )  
 PULPROG zg30  
 TD 65536  
 SOLVENT DMSO  
 NS 16  
 DS 2  
 SWH 8012.820 Hz  
 FIDRES 0.244532 Hz  
 AQ 4.0884483 sec  
 RG 120.93  
 DW 62.400 usec  
 DE 6.50 usec  
 TE 292.6 K  
 D1 1.00000000 sec  
 TDO 1  
 SFO1 400.2024712 MHz  
 NUC1 1H  
 P1 13.50 usec  
 PLW1 13.0000000 W

F2 - Processing parameters  
 SI 65536  
 SF 400.2000000 MHz  
 MDW EM  
 SSB 0  
 LB 0.30 Hz  
 GB 0  
 PC 1.00

MOHAMED-9C  
 C13-BSU DMSO (C:\data) abeer 10

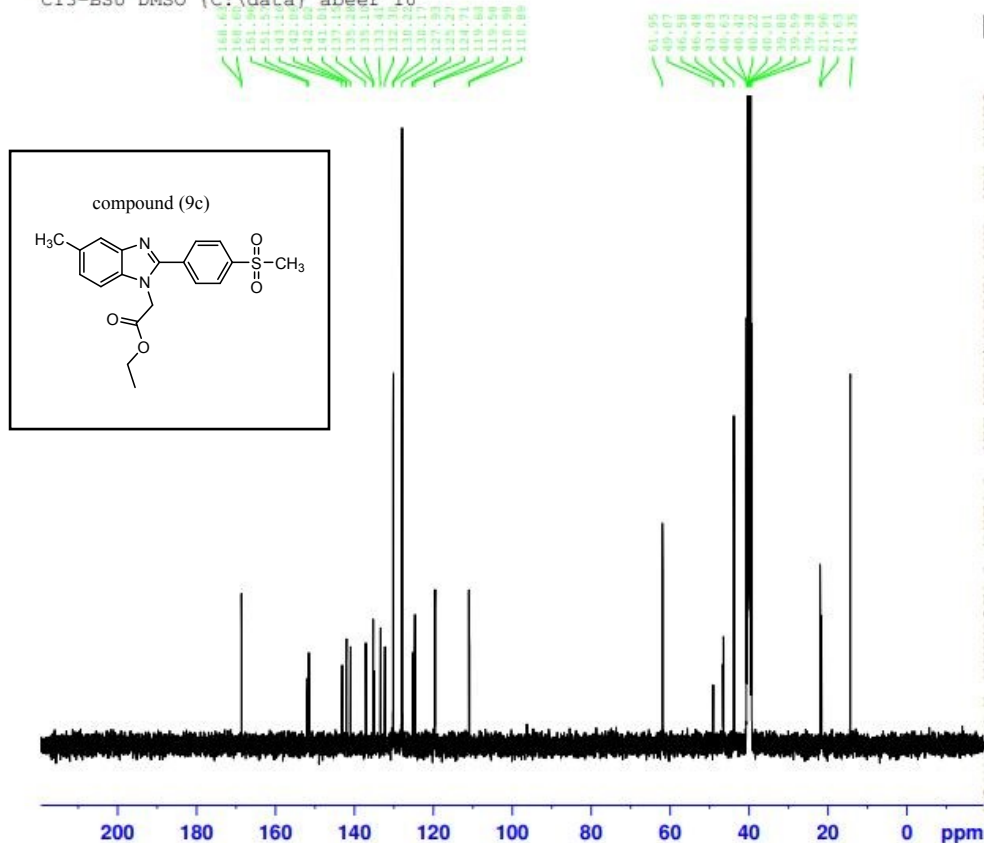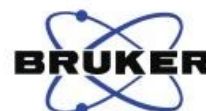

Current Data Parameters  
 NAME Jul12-2021-abeer  
 EXPNO 160  
 PROCNO 1

F2 - Acquisition Parameters  
 Date\_ 20210713  
 Time 2.43  
 INSTRUM spect  
 PROBHD 5 mm PABBO BB/  
 PULPROG zgpg30  
 TD 65536  
 SOLVENT DMSO  
 NS 4000  
 DS 4  
 SWH 24038.461 Hz  
 FIDRES 0.366798 Hz  
 AQ 1.3631488 sec  
 RG 205.44  
 DW 20.800 usec  
 DE 6.50 usec  
 TE 299.0 K  
 D1 2.00000000 sec  
 D11 0.03000000 sec  
 TDO 1

===== CHANNEL f1 =====  
 SFO1 100.6228293 MHz  
 NUC1 13C  
 P1 10.00 usec  
 PLW1 66.00000000 W

===== CHANNEL f2 =====  
 SFO2 400.1316005 MHz  
 NUC2 1H  
 CPDPRG[2] waltz16  
 PCPD2 90.00 usec  
 PLW2 16.00000000 W  
 PLW12 0.21777999 W  
 PLW13 0.17640001 W

F2 - Processing parameters  
 SI 131072  
 SF 100.6127690 MHz  
 MDW EM  
 SSB 0  
 LB 1.00 Hz  
 GB 0  
 PC 1.40

# 10. <sup>1</sup>H and <sup>13</sup>C NMR Spectra of 10a:

Martha Moheb-El-WH-proton

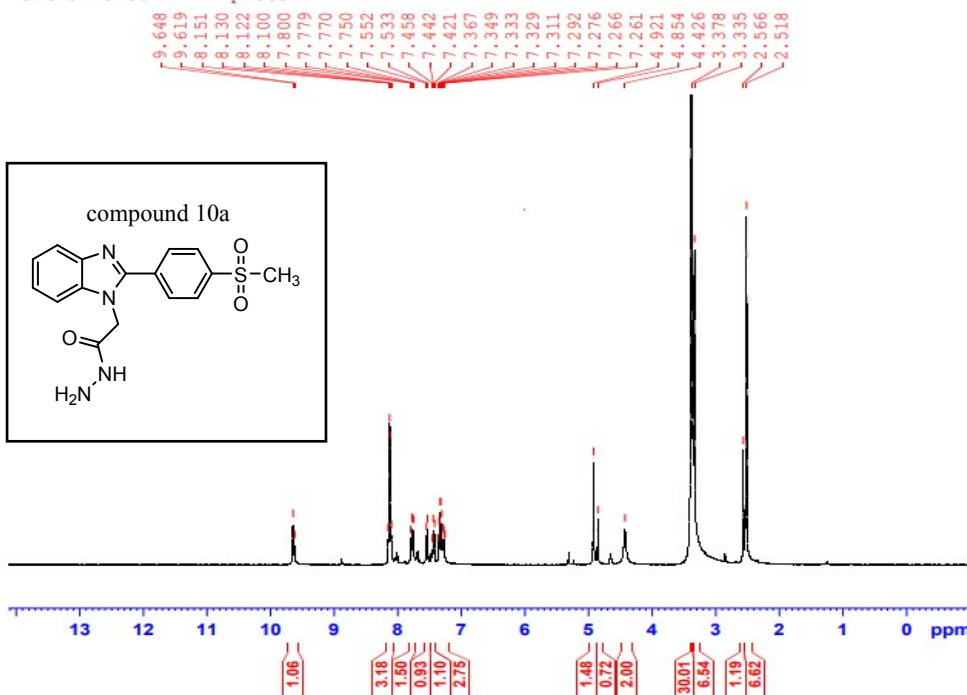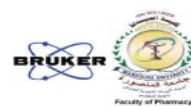

Current Data Parameters  
 NAME Martha Moheb-El-WH-proton  
 EXPNO 10  
 PROCNO 1

F2 - Acquisition Parameters  
 Date\_ 20180930  
 Time 11.14 h  
 INSTRUM spect  
 PROBHD z108618\_0945 (4  
 PULPROG zg30  
 TD 65536  
 SOLVENT DMSO  
 NS 16  
 DS 2  
 SWH 8012.820 Hz  
 FIDRES 0.244532 Hz  
 AQ 4.0894465 sec  
 RG 197.77  
 DW 62.400 usec  
 DE 6.50 usec  
 TE 299.0 K  
 D1 1.00000000 sec  
 TD0 1  
 SFO1 400.2024712 MHz  
 NUC1 1H  
 P1 13.50 usec  
 PLW1 13.00000000 W

F2 - Processing parameters  
 SI 65536  
 SF 400.2000000 MHz  
 WDW EM  
 SSB 0  
 LB 0.30 Hz  
 GB 0  
 PC 1.00

MOHAMED-10A  
 C13-BSU DMSO (C:\data) abeer 9

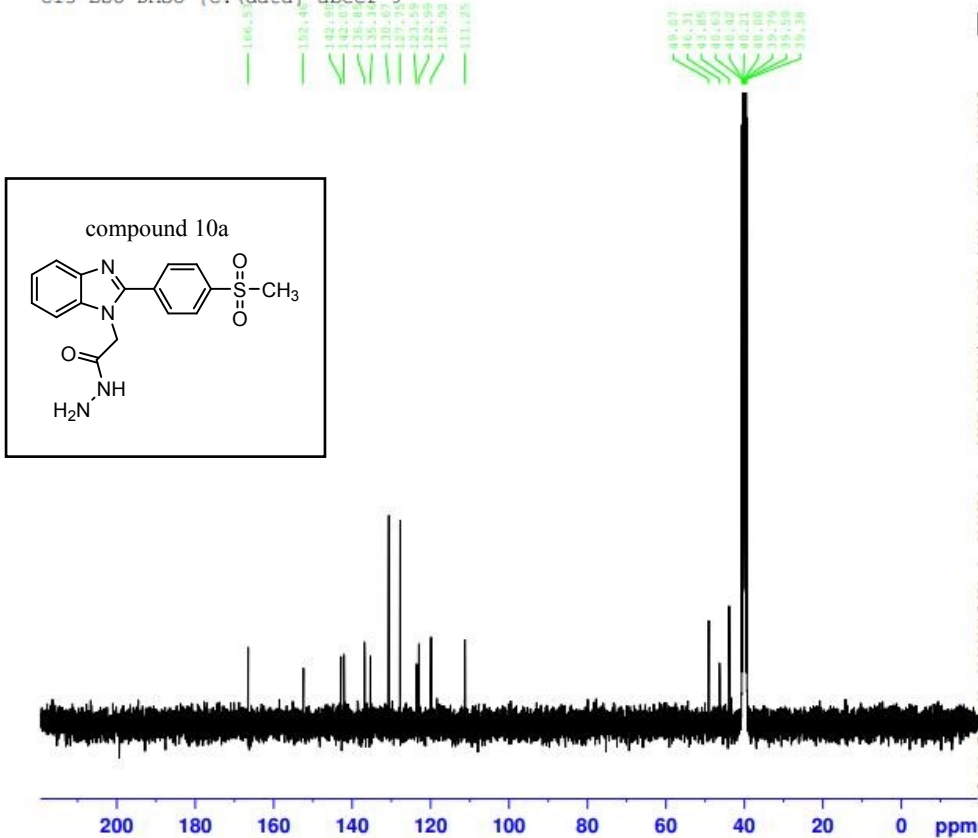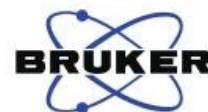

Current Data Parameters  
 NAME Jul12-2021-abeer  
 EXPNO 150  
 PROCNO 1

F2 - Acquisition Parameters  
 Date\_ 20210712  
 Time 22.52  
 INSTRUM spect  
 PROBHD 5 mm PABBO BB/  
 PULPROG zgpg30  
 TD 65536  
 SOLVENT DMSO  
 NS 4000  
 DS 4  
 SWH 24038.461 Hz  
 FIDRES 0.366798 Hz  
 AQ 1.3631488 sec  
 RG 205.44  
 DW 20.800 usec  
 DE 6.50 usec  
 TE 299.1 K  
 D1 2.00000000 sec  
 D11 0.03000000 sec  
 TD0 1

===== CHANNEL f1 =====  
 SFO1 100.6228293 MHz  
 NUC1 13C  
 P1 10.00 usec  
 PLW1 66.00000000 W

===== CHANNEL f2 =====  
 SFO2 400.1316005 MHz  
 NUC2 1H  
 CPDPRG2 waltz16  
 PCPD2 90.00 usec  
 PLW2 16.00000000 W  
 PLW12 0.21777999 W  
 PLW13 0.17640001 W

F2 - Processing parameters  
 SI 131072  
 SF 100.6127690 MHz  
 WDW EM  
 SSB 0  
 LB 1.00 Hz  
 GB 0  
 PC 1.40

# 11. <sup>1</sup>H and <sup>13</sup>C NMR Spectra of 10b:

Martha Moheb-E2-WH-proton

9.620  
9.596  
8.118  
8.025  
8.019  
8.003  
7.892  
7.839  
7.785  
7.773  
7.763  
7.712  
7.601  
7.579  
7.413  
7.409  
7.391  
7.388  
7.353  
7.349  
7.331  
7.328  
4.933  
4.431  
3.378  
3.338  
2.852  
2.518

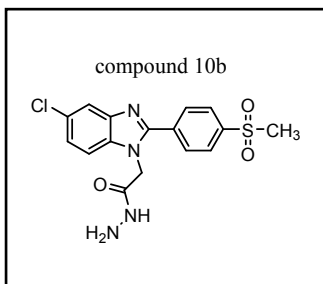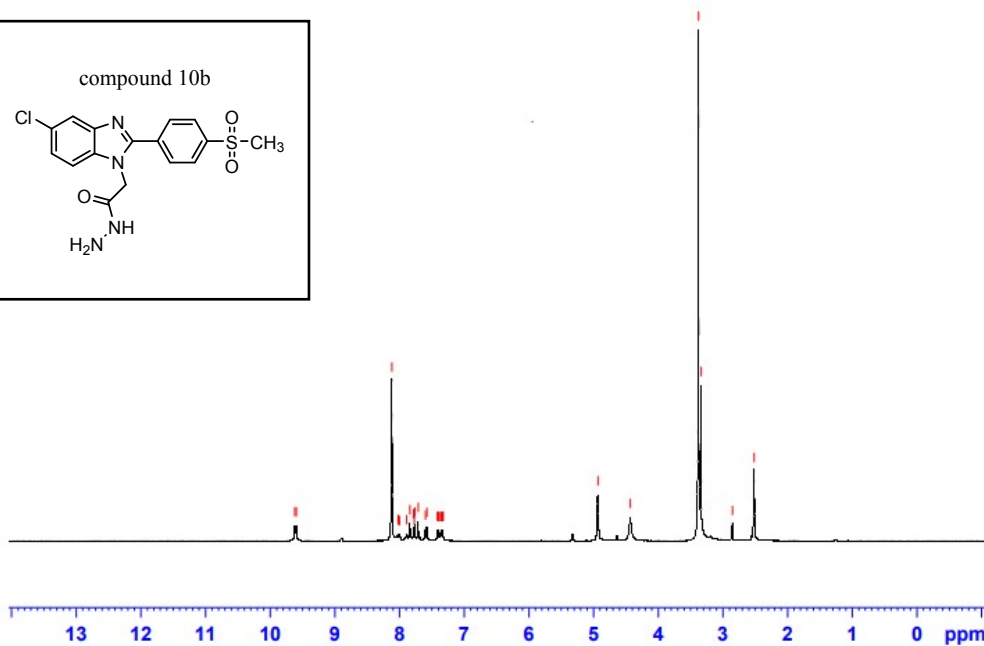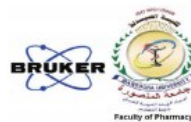

Current Data Parameters  
NAME Martha Moheb-E2-WH-proton  
EXPNO 10  
PROCNO 1

F2 - Acquisition Parameters  
Date\_ 20190930  
Time\_ 11:19 h  
INSTRUM spect  
PROBHD Z108618\_0945 ( )  
PULPROG zg30  
TD 65536  
SOLVENT DMSO  
NS 16  
DS 2  
SWH 8012.820 Hz  
FIDRES 0.244532 Hz  
AQ 4.0894465 sec  
RG 176.72  
DW 62.400 usec  
DE 6.50 usec  
TE 293.0 K  
D1 1.00000000 sec  
TD0 1  
SFO1 400.2024712 MHz  
NUC1 1H  
P1 13.50 usec  
PLW1 13.00000000 W

F2 - Processing parameters  
SI 65536  
SF 400.2000000 MHz  
WDW EM  
SSB 0  
LB 0.30 Hz  
GB 0  
PC 1.00

Activa  
Go to S

Martha Moheb-E2-D2O-D

8.121  
8.100  
8.080  
8.058  
7.819  
7.814  
7.771  
7.760  
7.749  
7.682  
7.678  
7.579  
7.558  
7.402  
7.397  
7.380  
7.376  
7.354  
7.350  
7.332  
7.328  
7.313  
5.314  
5.307  
4.919  
3.678  
3.302  
2.836  
2.519

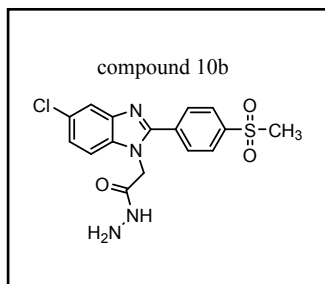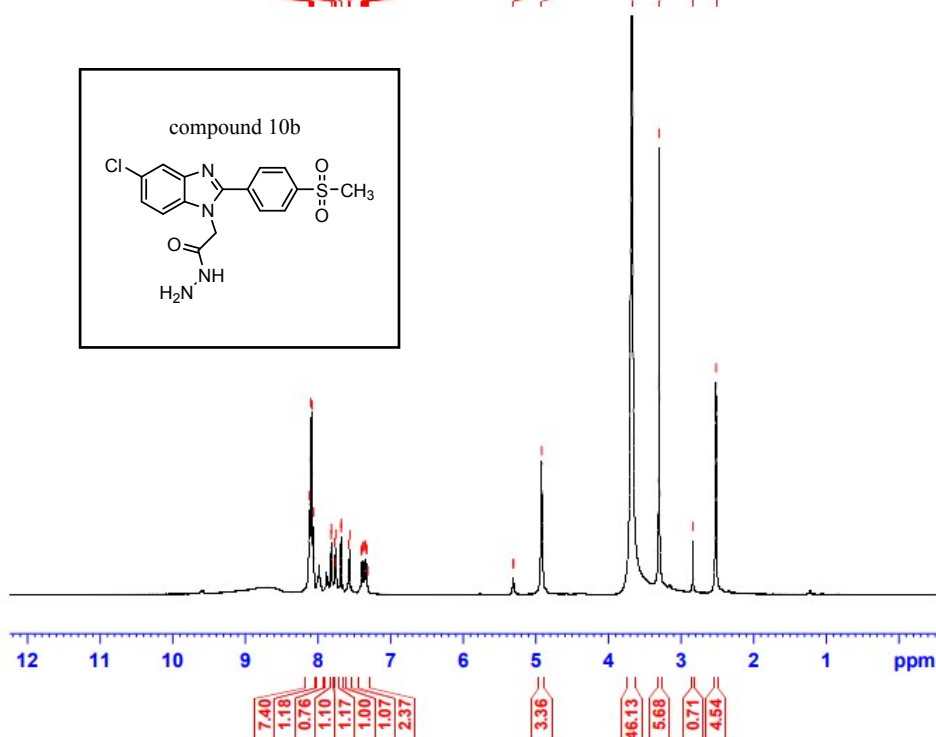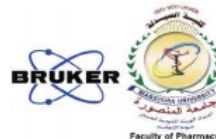

Current Data Parameters  
NAME Martha Moheb-E2-D2O  
EXPNO 10  
PROCNO 1

F2 - Acquisition Parameters  
Date\_ 20191001  
Time\_ 3:08 h  
INSTRUM spect  
PROBHD Z108618\_0945 ( )  
PULPROG zg30  
TD 65536  
SOLVENT DMSO  
NS 16  
DS 2  
SWH 8012.820 Hz  
FIDRES 0.244532 Hz  
AQ 4.0894465 sec  
RG 135.42  
DW 62.400 usec  
DE 6.50 usec  
TE 292.9 K  
D1 1.00000000 sec  
TD0 1  
SFO1 400.2024712 MHz  
NUC1 13C  
P1 13.50 usec  
PLW1 13.00000000 W

F2 - Processing parameters  
SI 65536  
SF 400.2000000 MHz  
WDW EM  
SSB 0  
LB 0.30 Hz  
GB 0  
PC 1.00

Activa  
Go to



AHMED S-29  
 DEPTQ-BSU DMSO (C:\data) nmr\_8

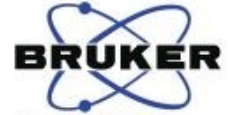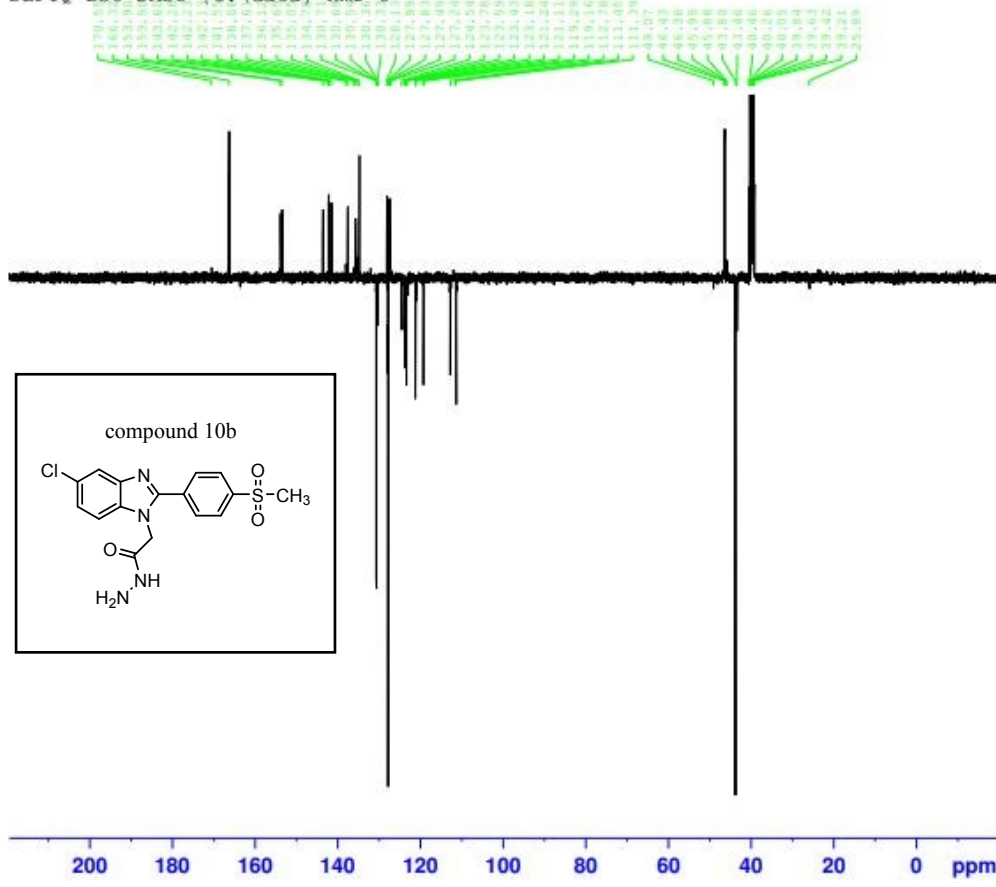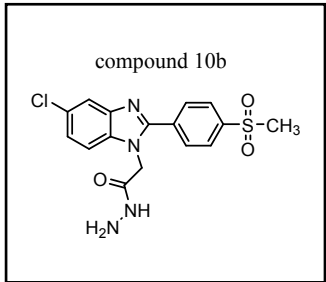

Current Data Parameters  
 NAME Jun24-2017-nmr  
 EXPNO 160  
 PROCNO 1

F2 - Acquisition Parameters  
 Date\_ 20170625  
 Time 0.06  
 INSTRUM spect  
 PULPROG 3 == PABPO 2B/  
 DCLPROG dephcpgppp  
 TD 65536  
 SOLVENT DMSO  
 NS 4000  
 DS 4  
 SWS 24038.461 Hz  
 FIDRES 0.366738 Hz  
 AQ 1.3631488 sec  
 RG 205.44  
 DW 20.800 usec  
 DE 6.50 usec  
 TE 295.7 K  
 CMT2 145.000000  
 CMT12 1.5000000  
 D1 2.0000000 sec  
 D2 0.00344828 sec  
 D12 0.00000000 sec  
 D18 0.00020000 sec  
 TD0 1

===== CHANNEL f1 =====  
 SFO1 100.6228303 MHz  
 NUC1 13C  
 P1 10.00 usec  
 P13 2000.00 usec  
 PLW0 0 W  
 P1M1 68.0000000 W  
 SFOALS 0 Hz  
 SFOFFS 0 Hz  
 SFR3 10.08399843 W

===== CHANNEL f2 =====  
 SFO2 400.1313791 MHz  
 NUC2 1H  
 CPDPRG2 waltz16  
 PC 11.75 usec  
 P3 10.50 usec  
 P4 21.00 usec  
 PCPD2 90.00 usec  
 PLW2 16.0000000 W  
 PLW12 0.21777999 W

===== GRADIENT CHANNEL1 =====  
 GPNAM[1] SMSQ10.100  
 GPNAM[2] SMSQ10.100  
 GPNAM[3] SMSQ10.100  
 GP21 31.00 %  
 GP22 31.00 %  
 GP23 31.00 %  
 P16 1000.00 usec

F2 - Processing parameters  
 SI 32768  
 SF 100.6127490 MHz  
 WCW RM  
 SGB 0  
 LB 1.00 Hz  
 GB 0  
 PC 1.40

## 12. <sup>1</sup>H and <sup>13</sup>C NMR Spectra of 10c:

Martha Moheb-E3-WH-proton again

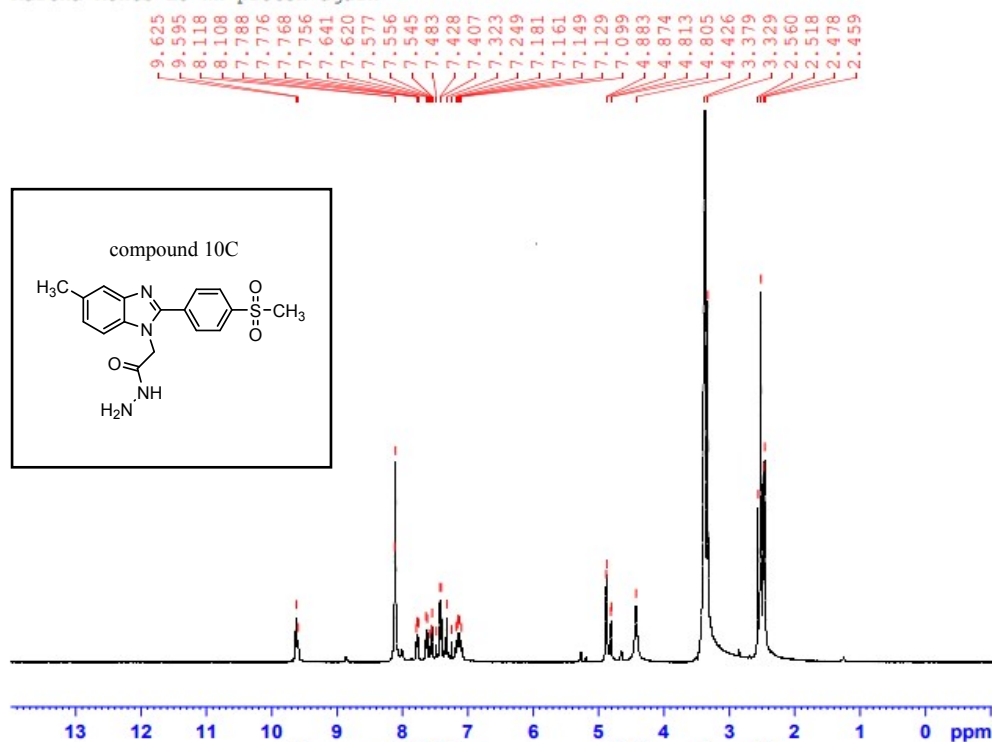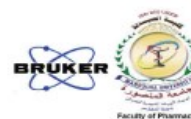

```

Current Data Parameters
NAME      Martha Moheb-E3-WH-proton again
EXPNO    10
PROCNO   1

F2 - Acquisition Parameters
Date_    20190930
Time     12.22 h
INSTRUM spect
PROBHD   Z108618_0945 (
PULPROG zg30
TD       65536
SOLVENT  DMSO
NS       16
DS       2
SWH      8012.820 Hz
FIDRES   0.244532 Hz
AQ       4.0894465 sec
RG       176.72
SW       62.400 usec
DE       6.30 usec
TE       292.9 K
D1       1.00000000 sec
TD0      1
SFO1     400.2024712 MHz
NUC1     1H
P1       13.50 usec
PLW1     13.00000000 W

F2 - Processing parameters
SI       65536
SF       400.2000000 MHz
WDW      EM
SSB      0
LB       0.30 Hz
GB       0
PC       1.00
    
```

Martha Moheb-E3-D2O-D

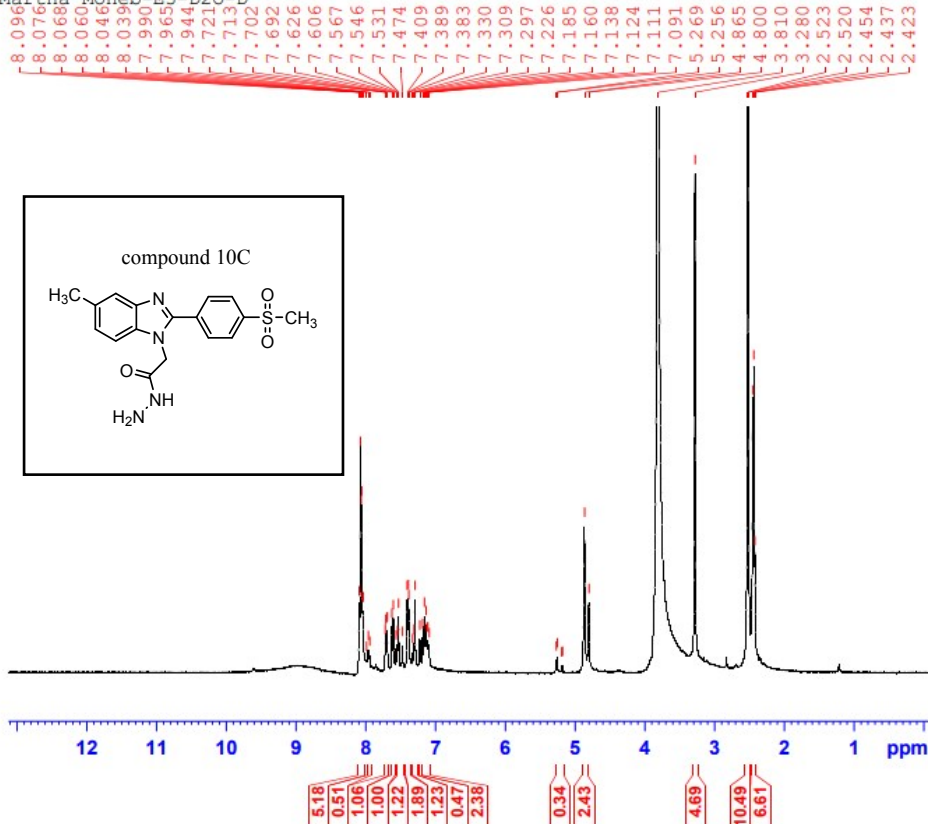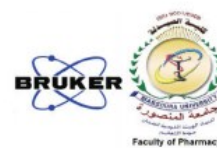

```

Current Data Parameters
NAME      Martha Moheb-E3-D2O-
EXPNO    10
PROCNO   1

F2 - Acquisition Parameters
Date_    20191001
Time     3.12 h
INSTRUM spect
PROBHD   Z108618_0945 (
PULPROG zg30
TD       65536
SOLVENT  DMSO
NS       16
DS       2
SWH      8012.820 Hz
FIDRES   0.244532 Hz
AQ       4.0894465 sec
RG       158.72
DW       62.400 usec
DE       6.50 usec
TE       292.9 K
D1       1.00000000 sec
TD0      1
SFO1     400.2024712 MHz
NUC1     1H
P1       13.50 usec
PLW1     13.00000000 W

F2 - Processing parameters
SI       65536
SF       400.2000000 MHz
WDW      EM
SSB      0
LB       0.30 Hz
GB       0
PC       1.00
    
```

MARCO-53  
C13-BSU DMSO (C:\data) nmr 1

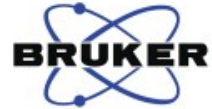

166.8630  
166.8630  
166.8630  
152.7190  
151.9190  
149.2720  
141.8110  
141.8110  
137.7740  
137.7740  
135.0130  
135.0130  
133.1330  
132.7790  
132.7790  
131.6180  
131.6180  
130.9130  
130.9130  
129.0130  
128.0130  
127.9180  
127.9180  
127.1180  
126.8180  
126.8180  
125.9180  
125.9180  
125.0130  
124.9130  
124.9130  
124.3130  
124.3130  
124.1230  
124.1230  
119.1170  
119.1170  
118.0130  
118.0130  
116.8130  
116.8130  
116.4930  
116.4930  
116.5230  
86.3330  
86.2230  
83.8630  
80.3730  
80.3730  
80.1630  
79.9530  
79.7430  
79.5330  
79.3330  
21.0930  
21.0630  
21.0630  
21.6530  
14.7730  
14.7730

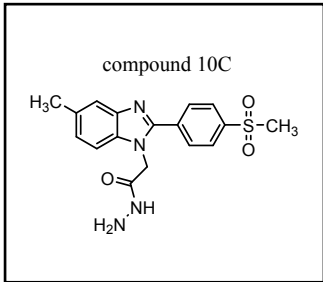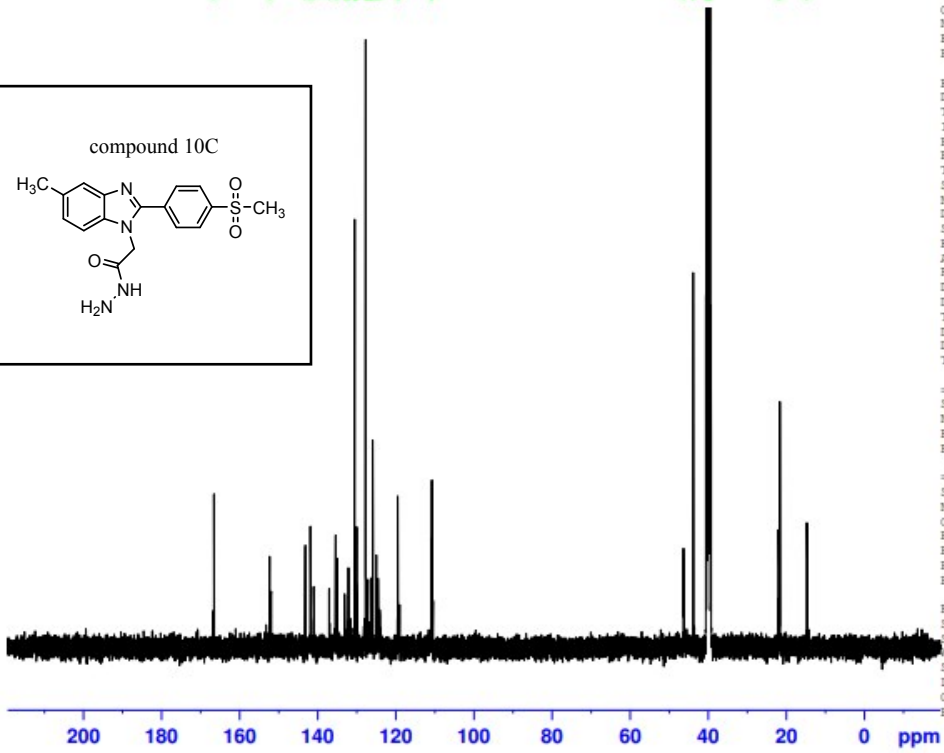

Current Data Parameters  
NAME Jul13-2017-nmr  
EXPNO 360  
PROCNO 1

F2 - Acquisition Parameters  
Date\_ 20170714  
Time 7.17  
INSTRUM spect  
PROBHD 5 mm PABBO BB/  
PULPROG zgpg30  
TD 65536  
SOLVENT DMSO  
NS 4000  
DS 4  
SWH 24038.461 Hz  
FIDRES 0.366798 Hz  
AQ 1.3631488 sec  
RG 205.44  
DW 20.800 usec  
DE 6.50 usec  
TE 298.2 K  
D1 2.0000000 sec  
D11 0.0300000 sec  
TD0 1

==== CHANNEL f1 =====  
SFO1 100.6228293 MHz  
NUC1 13C  
P1 10.00 usec  
PLW1 66.00000000 W

==== CHANNEL f2 =====  
SFO2 400.1316005 MHz  
NUC2 1H  
CPDPRG[2] waltr16  
PCPD2 90.00 usec  
PLW2 16.00000000 W  
PLW12 0.21777999 W  
PLW13 0.17640001 W

F2 - Processing parameters  
SI 131072  
SF 100.6127690 MHz  
WDW EM  
SSB 0  
LB 1.00 Hz  
GB 0  
PC 1.40

### 13. <sup>1</sup>H and <sup>13</sup>C NMR Spectra of 11a:

MOHAMEDA-2  
 PROTON\_BSU DMSO {C:\data} nmr 6

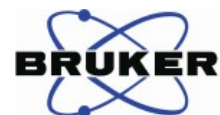

12.016  
 11.828  
 8.276  
 8.130  
 8.116  
 8.094  
 8.073  
 8.060  
 8.039  
 7.971  
 7.952  
 7.786  
 7.770  
 7.762  
 7.751  
 7.741  
 7.737  
 7.727  
 7.716  
 7.647  
 7.642  
 7.634  
 7.625  
 7.524  
 7.505  
 7.453  
 7.446  
 7.440  
 7.334  
 7.329  
 7.320  
 7.311  
 5.623  
 5.136  
 3.466  
 3.346  
 3.324  
 3.312  
 2.795  
 2.509

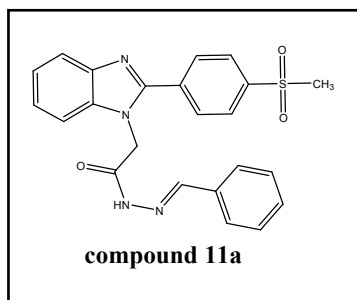

Current Data Parameters  
 NAME Dec13-2016-nmr  
 EXPNO 80  
 PROCNO 1

F2 - Acquisition Parameters  
 Date\_ 20161213  
 Time 9.55  
 INSTRUM spect  
 PROBHD 5 mm PABBO BB/  
 PULPROG zg30  
 TD 65536  
 SOLVENT DMSO  
 NS 32  
 DS 2  
 SWH 8012.820 Hz  
 FIDRES 0.122266 Hz  
 AQ 4.0894465 sec  
 RG 147.93  
 DW 62.400 usec  
 DE 6.50 usec  
 TE 299.1 K  
 D1 1.00000000 sec  
 TD0 1

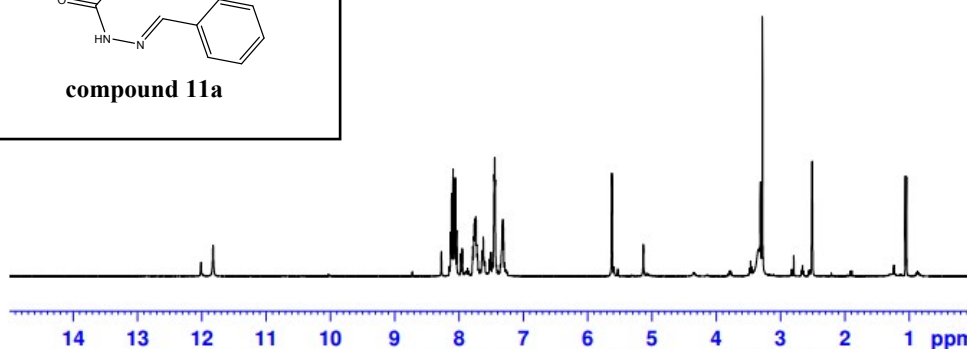

----- CHANNEL f1 -----  
 SF01 400.1324710 MHz  
 NUC1 1H  
 P1 10.00 usec  
 PLW1 16.00000000 W

F2 - Processing parameters  
 SI 65536  
 SF 400.1300000 MHz  
 WDW EM  
 SSB 0  
 LB 0.10 Hz  
 GB 0  
 PC 1.00

Dec13-2016-nmr  
 MOHAMED-A2  
 C13-BSU DMSO {C:\data} nmr 9

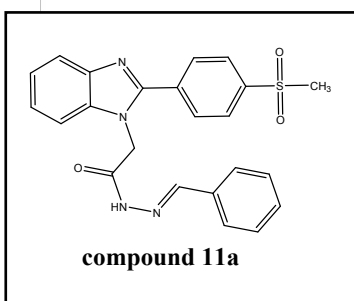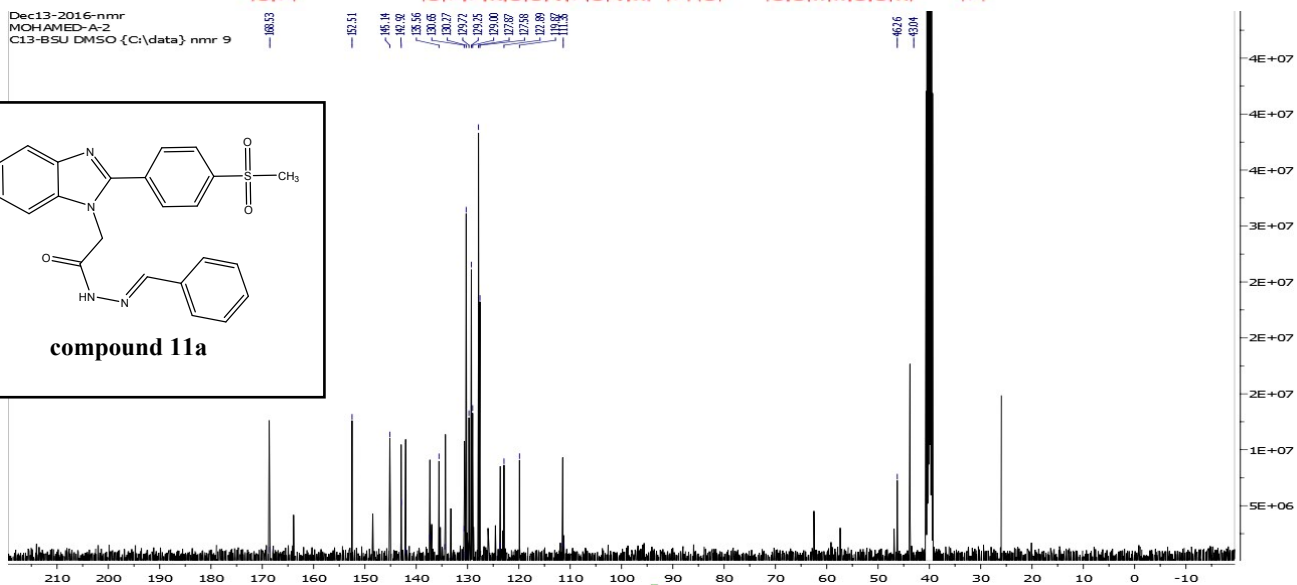

# 14. <sup>1</sup>H and NOESY Spectra of 11b:

AHMED S-1H  
 PROTON\_BSU DMSO {C:\data} abeer 11

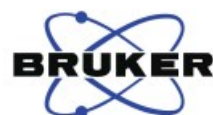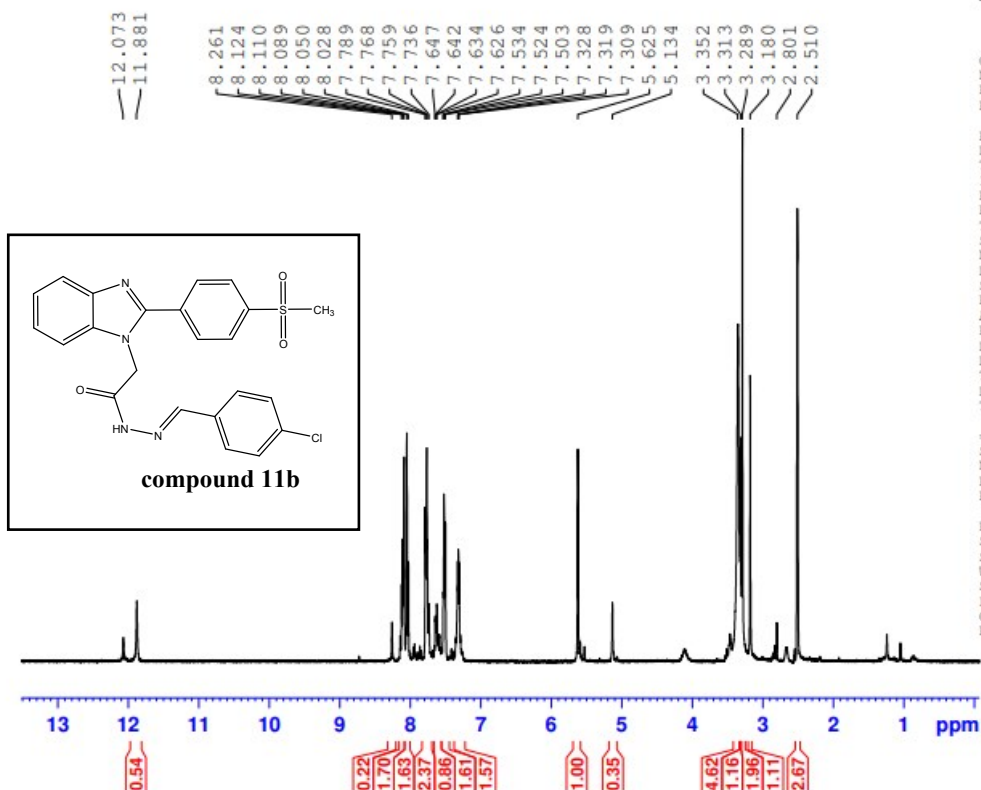

Current Data Parameters  
 NAME Jun03-2018-abeer  
 EXPNO 180  
 PROCNO 1

F2 - Acquisition Parameters  
 Date\_ 20180603  
 Time 12.21  
 INSTRUM spect  
 PROBHD 5 mm PABBO BB/  
 PULPROG zg30  
 TD 65536  
 SOLVENT DMSO  
 NS 16  
 DS 2  
 SWH 8012.820 Hz  
 FIDRES 0.122266 Hz  
 AQ 4.089465 sec  
 RG 147.93  
 DW 62.400 usec  
 DE 6.50 usec  
 TE 298.2 K  
 D1 1.00000000 sec  
 TD0 1

===== CHANNEL f1 =====  
 SF01 400.1324710 MHz  
 NUC1 1H  
 P1 10.00 usec  
 PLW1 16.00000000 W

F2 - Processing parameters  
 SI 65536  
 SF 400.1300000 MHz  
 WDW EM  
 SSB 0  
 LB 0.10 Hz  
 GB 0  
 PC 1.00

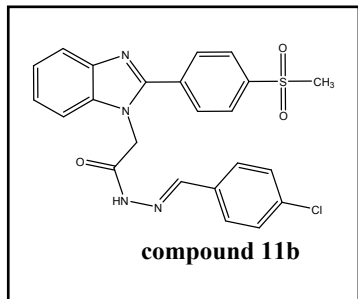

MOHAMED-11B  
 NOESY DMSO {C:\data} abeer 7

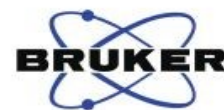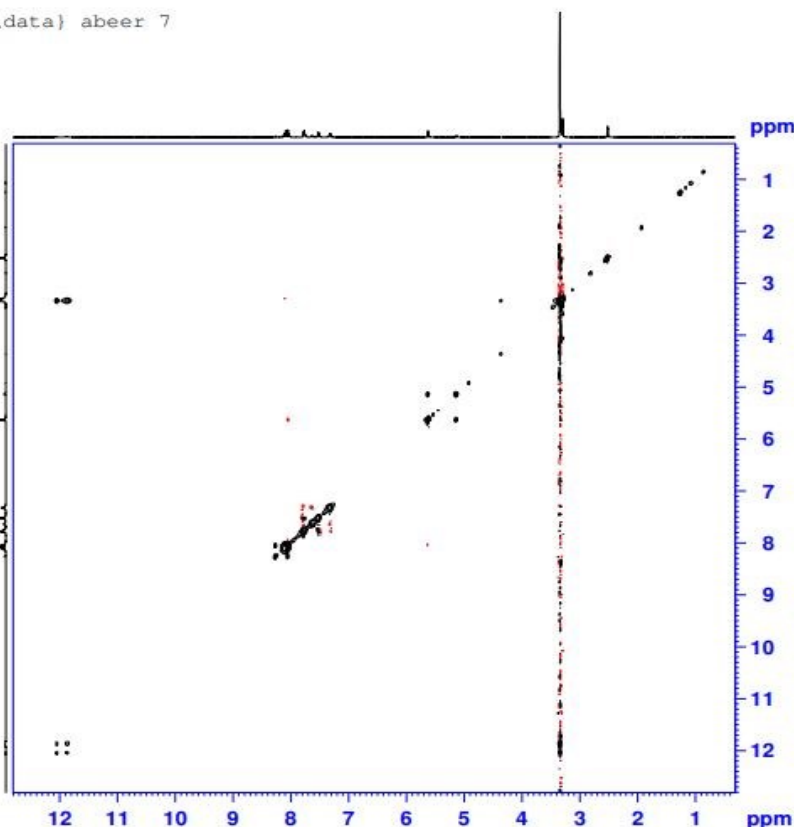

Current Data Parameters  
 NAME Jul14-2021-abeer  
 EXPNO 11  
 PROCNO 1

F2 - Acquisition Parameters  
 Date\_ 20210714  
 Time 15.38  
 INSTRUM spect  
 PROBHD 5 mm PABBO BB/  
 PULPROG noesygpgphpp  
 TD 2048  
 SOLVENT DMSO  
 NS 8  
 DS 32  
 SWH 5000.000 Hz  
 FIDRES 2.441406 Hz  
 AQ 0.2048000 sec  
 RG 66.73  
 DW 100.000 usec  
 DE 6.50 usec  
 TE 299.1 K  
 D0 0.00008727 sec  
 D1 1.07263505 sec  
 D8 0.30000001 sec  
 D11 0.03000000 sec  
 D12 0.00002000 sec  
 D16 0.00020000 sec  
 IN0 0.00020000 sec

===== CHANNEL f1 =====  
 SF01 400.1326244 MHz  
 NUC1 1H  
 P1 10.00 usec  
 P2 20.00 usec  
 P17 2500.00 usec  
 PLW1 16.00000000 W  
 PLW0 2.36689997 W

===== GRADIENT CHANNEL =====  
 GPPHM[1] SMSQ10.100  
 GPC1 40.00 Hz  
 F16 1000.00 usec

F1 - Acquisition parameters  
 TD 256  
 SF01 400.1326 MHz  
 FIDRES 19.531250 Hz  
 SW 12.496 ppm  
 FWH00K States=TPP1

F2 - Processing parameters  
 SI 1024  
 SF 400.1300000 MHz  
 WDW QSINE  
 SSB 2  
 LB 0 Hz  
 GB 0  
 PC 1.00

F1 - Processing parameters  
 SI 1024  
 NUC2 States=TPP1  
 SF 400.1300000 MHz  
 WDW QSINE  
 SSB 2  
 LB 0 Hz  
 GB 0

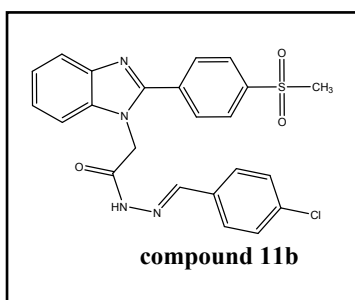



# 15. <sup>1</sup>H and <sup>13</sup>C NMR Spectra of 11c:

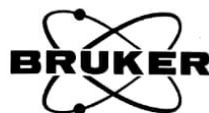

Current Data Parameters  
 NAME Jun15-2017-nmr  
 EXPNO 30  
 PROCNO 1

F2 - Acquisition Parameters  
 Date\_ 20170617  
 Time\_ 3.08  
 INSTRUM spect  
 PROBHD 5 mm PABBO BB/  
 PULPROG zg30  
 TD 65536  
 SOLVENT DMSO  
 NS 16  
 DS 2  
 SWH 8012.820 Hz  
 FIDRES 0.122266 Hz  
 AQ 4.0894465 sec  
 RG 91.28  
 DW 62.400 usec  
 DE 6.50 usec  
 TE 298.1 K  
 D1 1.00000000 sec  
 TDO 1

===== CHANNEL f1 =====  
 SFO1 400.1324710 MHz  
 NUC1 1H  
 P1 10.00 usec  
 PLW1 16.00000000 W

F2 - Processing parameters  
 SI 65536  
 SF 400.1300000 MHz  
 WDW EM  
 SSB 0  
 LB 0.10 Hz  
 GB 0  
 PC 1.00

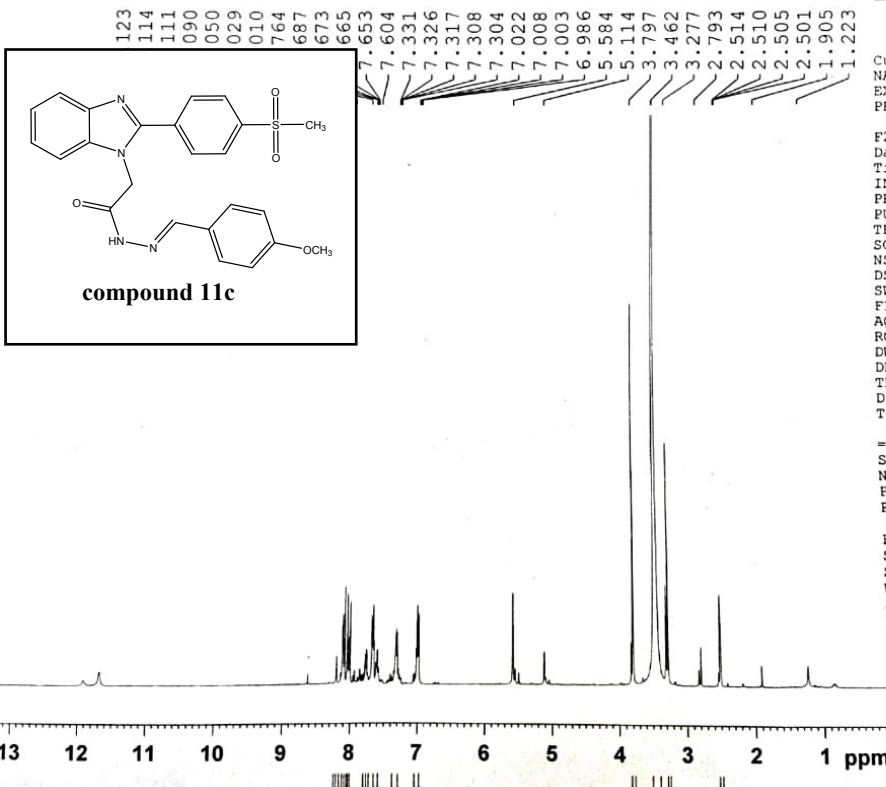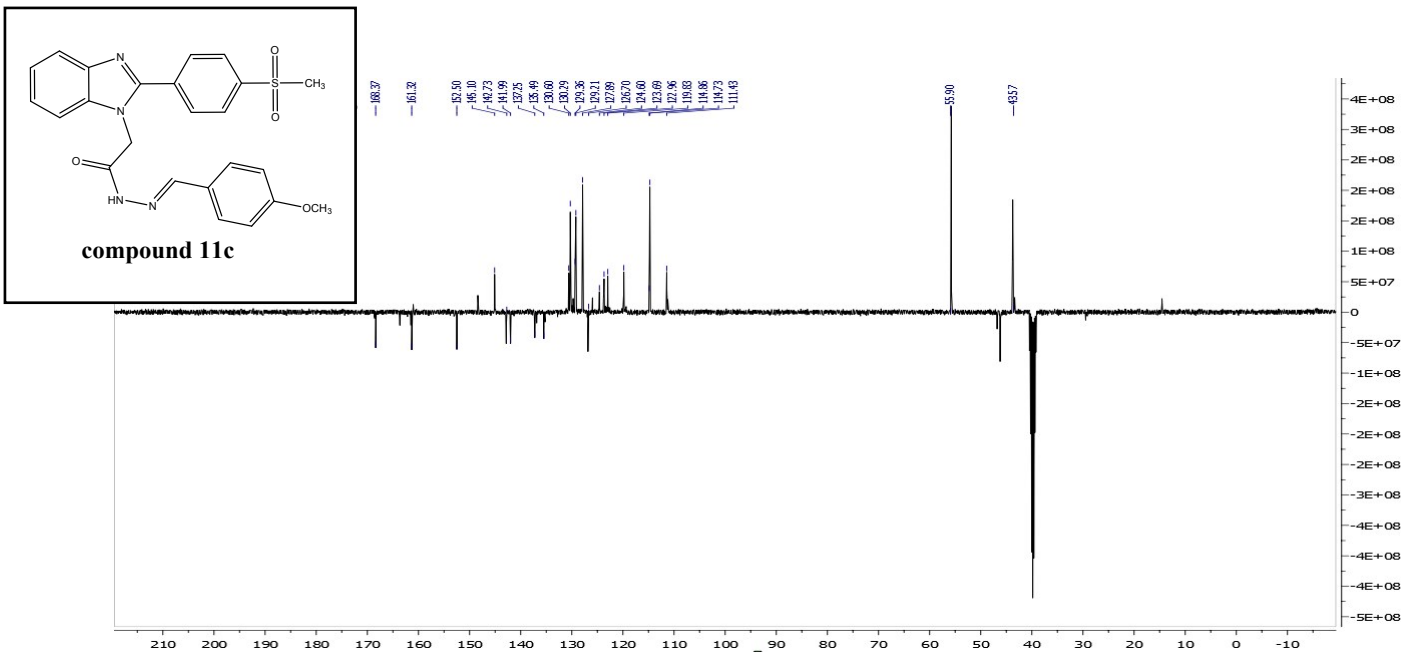

## 16. <sup>1</sup>H and <sup>13</sup>C NMR Spectra of 11d:

MOHAMEDA-8  
PROTON\_BSU DMSO {C:\data} nmr 5

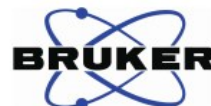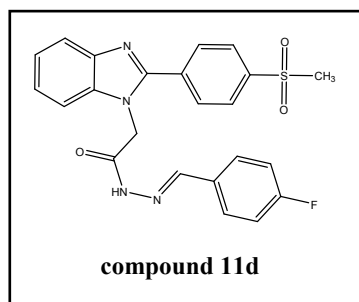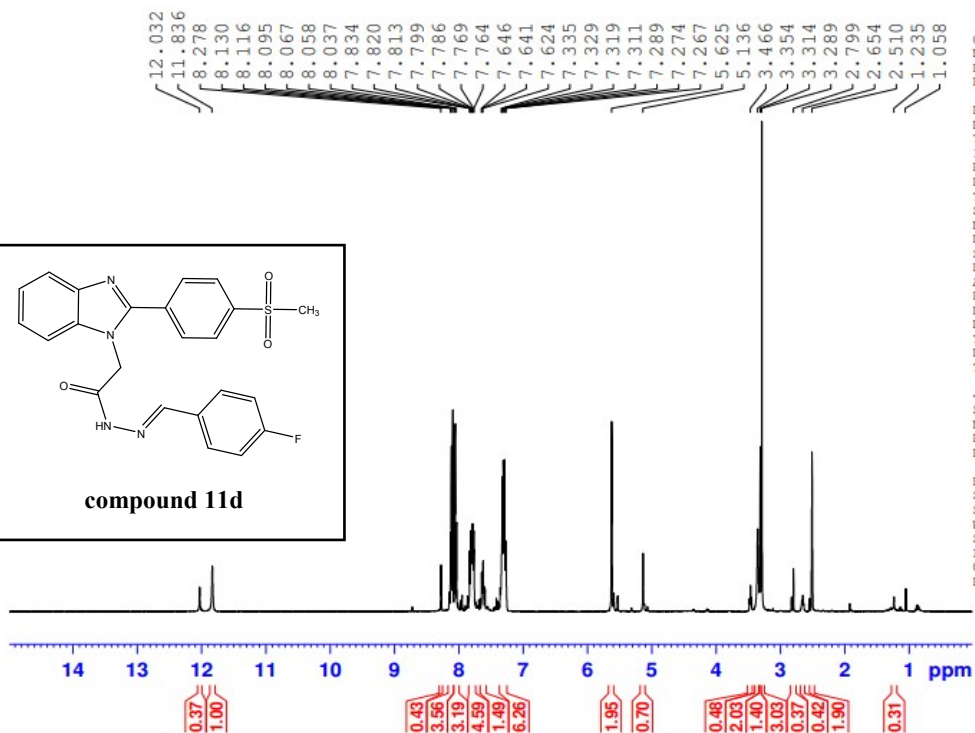

Current Data Parameters  
NAME Dec13-2016-nmr  
EXPNO 70  
PROCNO 1

F2 - Acquisition Parameters  
Date\_ 20161213  
Time 9.50  
INSTRUM spect  
PROBHD 5 mm PABBO BB/  
PULPROG zg30  
TD 65536  
SOLVENT DMSO  
NS 32  
DS 2  
SWH 8012.820 Hz  
FIDRES 0.122266 Hz  
AQ 4.0894465 sec  
RG 147.93  
DW 62.400 usec  
DE 6.50 usec  
TE 299.1 K  
D1 1.0000000 sec  
TD0 1

CHANNEL f1  
SFO1 400.1324710 MHz  
NUC1 1H  
P1 10.00 usec  
PLW1 16.00000000 W

F2 - Processing parameters  
SI 65536  
SF 400.1300000 MHz  
WDW EM  
SSB 0  
LB 0.10 Hz  
GB 0  
PC 1.00

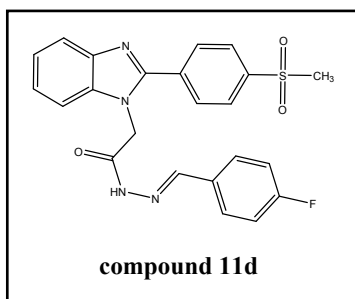

MOHAMED-A-8  
C13-BSU DMSO (C:\data) nmr 10

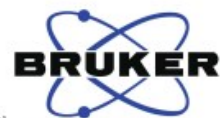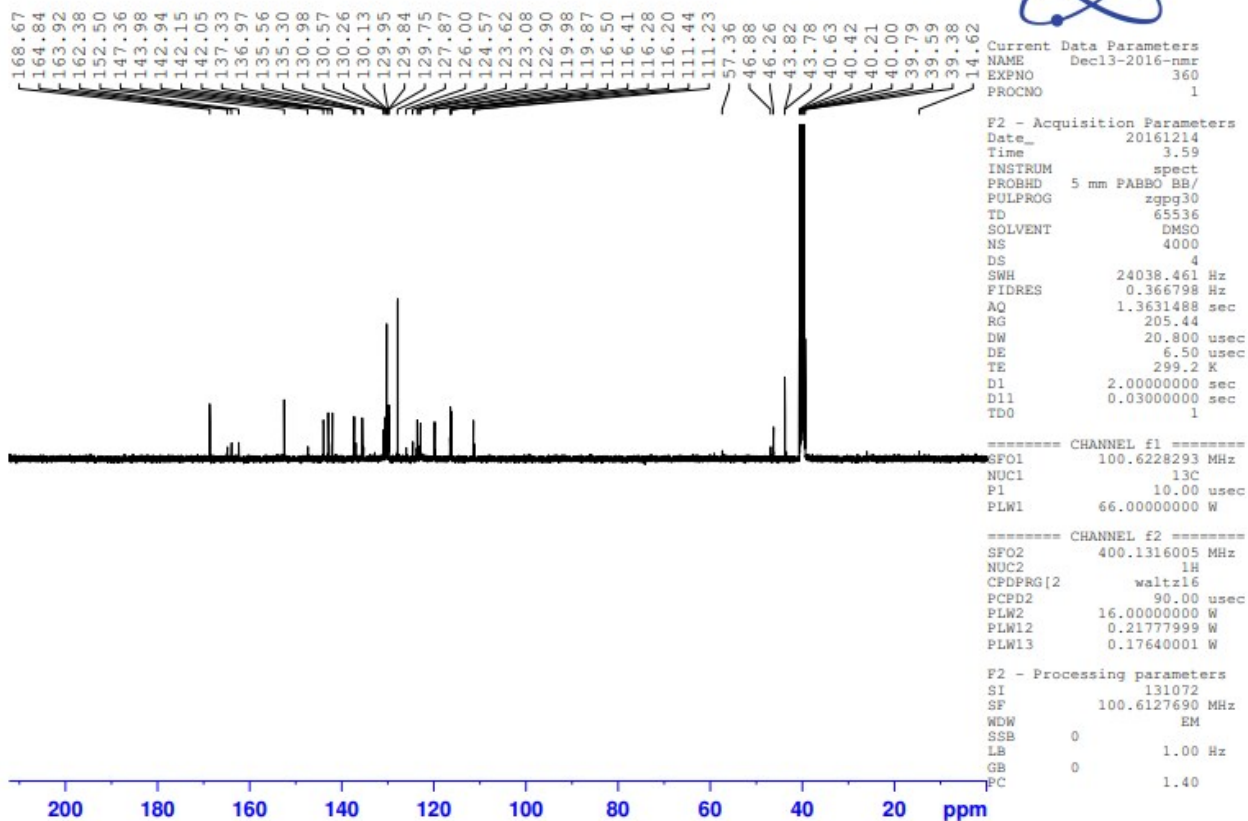

### 17. <sup>1</sup>H and <sup>13</sup>C NMR Spectra of 11e:

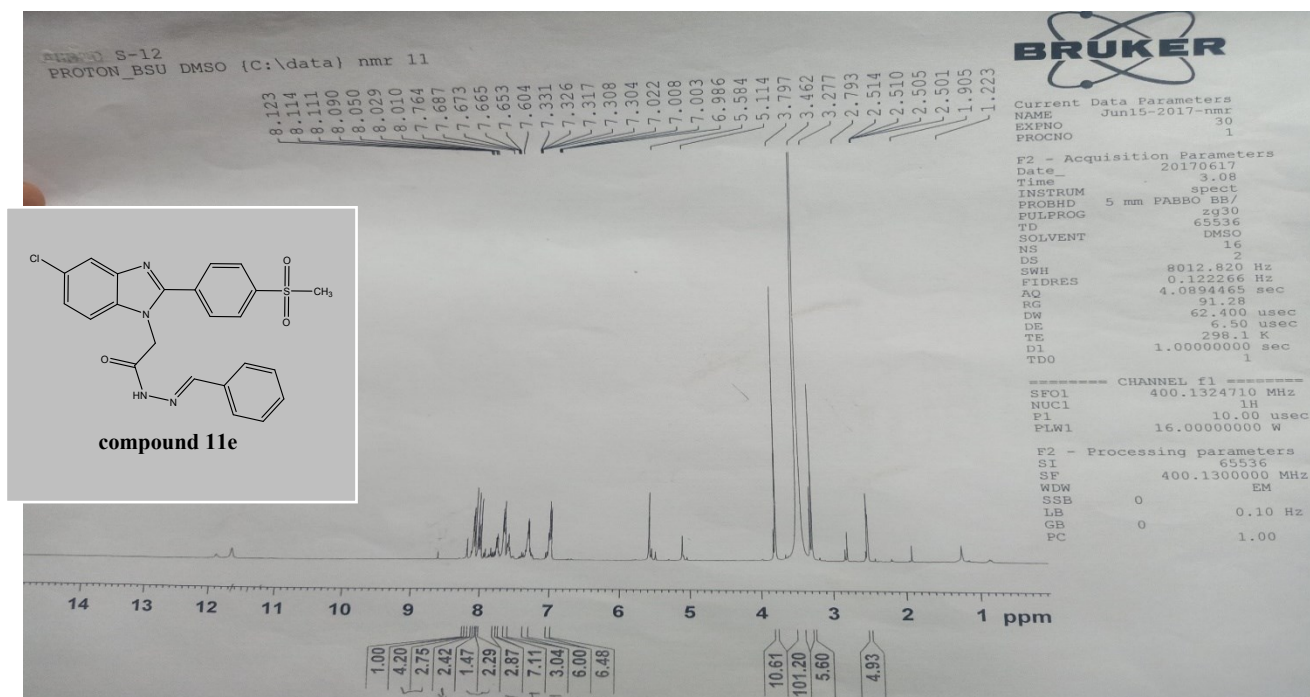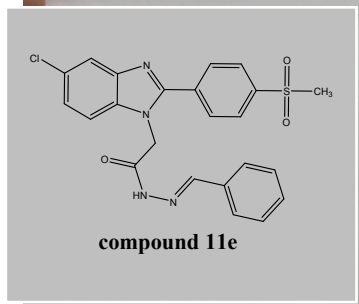



FEBY-CL2  
C13-BSU DMSO (C:\data) nmr 20

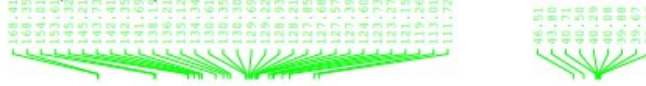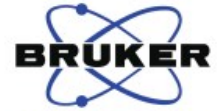

Current Data Parameters  
NAME Feb05-2017-nmr  
EXPNO 120  
PROCNO 1

F2 - Acquisition Parameters  
Date\_ 20170206  
Time 10.45  
INSTRUM spect  
PROBHD 5 mm PABBO BB/  
PULPROG zgpg30  
TD 65536  
SOLVENT DMSO  
NS 4000  
DS 4  
SWH 24038.461 Hz  
FIDRES 0.366798 Hz  
AQ 1.3631488 sec  
RG 205.44  
DW 20.800 usec  
DE 6.50 usec  
TE 313.1 K  
D1 2.00000000 sec  
D11 0.03000000 sec  
TDO 1

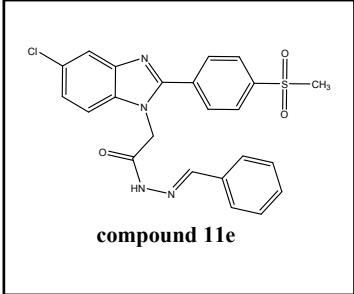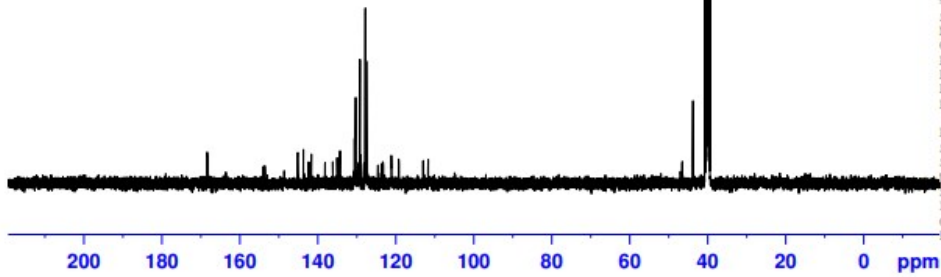

===== CHANNEL f1 =====  
SFO1 100.6228293 MHz  
NUC1 13C  
P1 10.00 usec  
PLW1 66.00000000 W

===== CHANNEL f2 =====  
SFO2 400.1316005 MHz  
NUC2 1H  
CPDPRG[2] waltz16  
PCPD2 90.00 usec  
PLW2 16.00000000 W  
PLW3 0.21777999 W  
PLW13 0.17640001 W

F2 - Processing parameters  
SI 131072  
SF 100.6127690 MHz  
WDW EM  
SSB 0  
LB 1.00 Hz  
GB 0  
PC 1.40

FEBY-CL2-D20  
PROTON\_BSU DMSO (C:\data) nmr 23

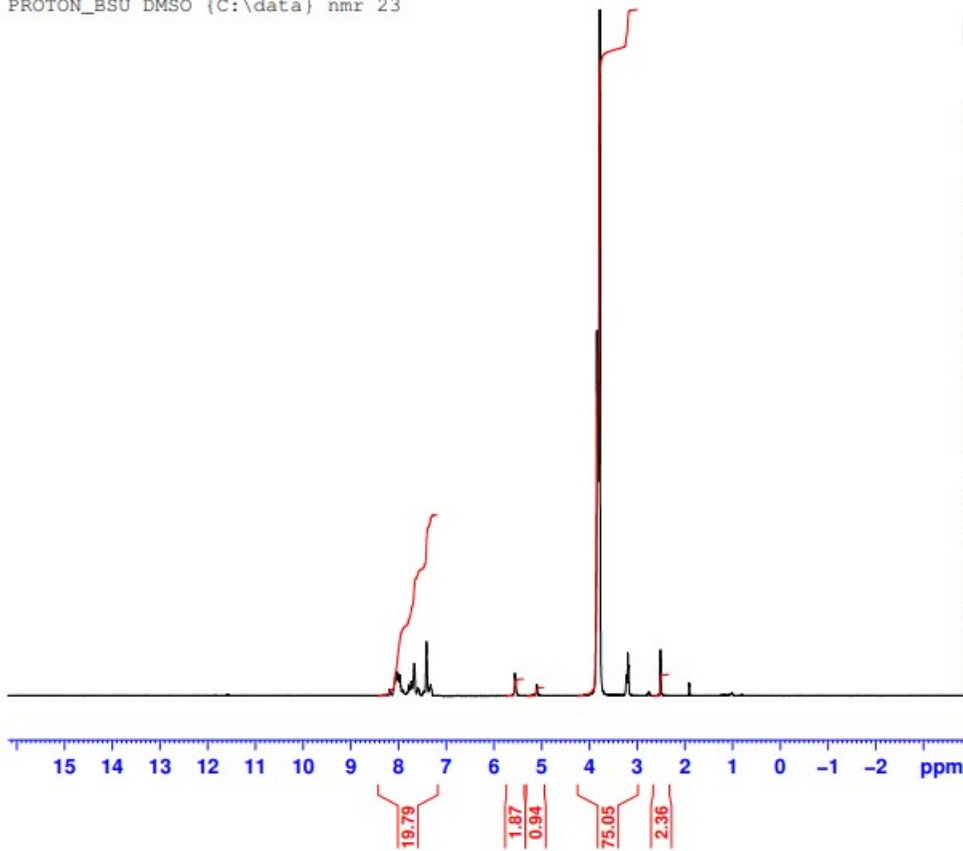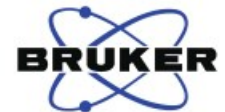

Current Data Parameters  
NAME Feb06-2017-nmr  
EXPNO 30  
PROCNO 1

F2 - Acquisition Parameters  
Date\_ 20170206  
Time 11.12  
INSTRUM spect  
PROBHD 5 mm PABBO BB/  
PULPROG zg30  
TD 65536  
SOLVENT DMSO  
NS 16  
DS 2  
SWH 8012.820 Hz  
FIDRES 0.122266 Hz  
AQ 4.0894465 sec  
RG 102.37  
DW 62.400 usec  
DE 6.50 usec  
TE 313.2 K  
D1 1.00000000 sec  
TDO 1

===== CHANNEL f1 =====  
SFO1 400.1324710 MHz  
NUC1 1H  
P1 10.00 usec  
PLW1 16.00000000 W

F2 - Processing parameters  
SI 65536  
SF 400.1300000 MHz  
WDW EM  
SSB 0  
LB 0.10 Hz  
GB 0  
PC 1.00

### 18. <sup>1</sup>H and <sup>13</sup>C NMR Spectra of 11f:

MARCO-CL10  
 PROTON\_BSU DMSO (C:\data) nmr 19

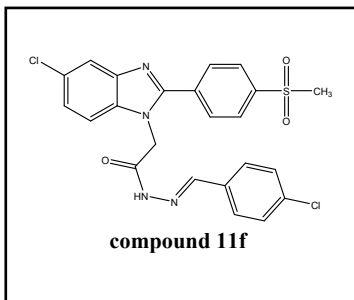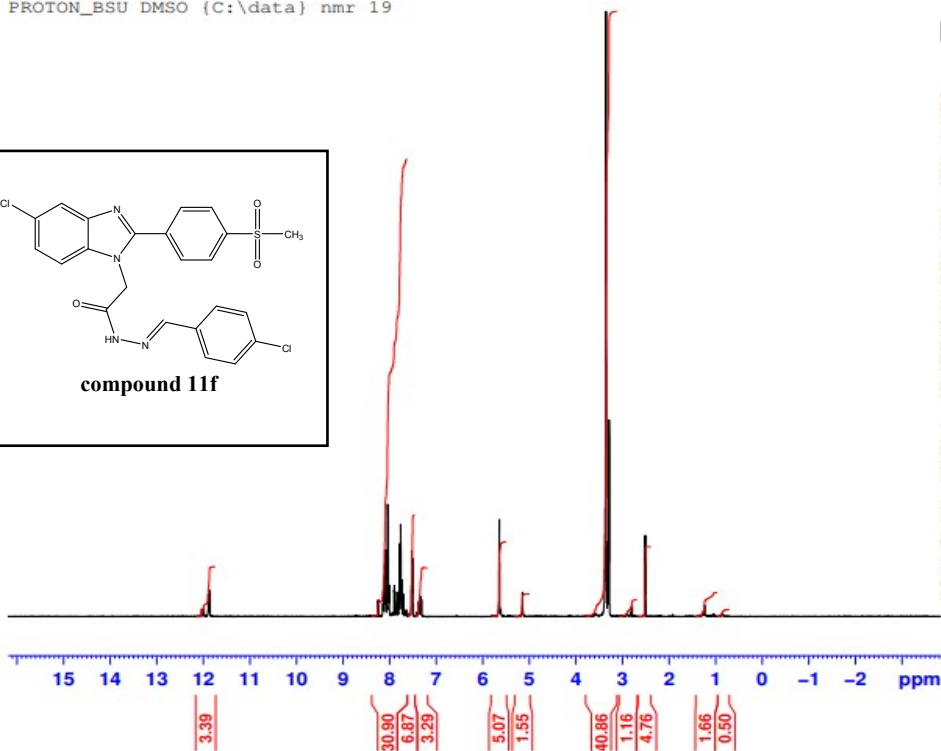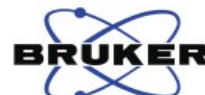

Current Data Parameters  
 NAME Mar11-2017-nmr  
 EXPNO 270  
 PROCNO 1

F2 - Acquisition Parameters  
 Date\_ 20170311  
 Time 17.14  
 INSTRUM spect  
 PROBHD 5 mm PABBO BB/  
 PULPROG zg30  
 TD 65536  
 SOLVENT DMSO  
 NS 16  
 DS 2  
 SWH 8012.820 Hz  
 FIDRES 0.122266 Hz  
 AQ 4.0894465 sec  
 RG 147.93  
 DW 62.400 usec  
 DE 6.50 usec  
 TE 298.1 K  
 D1 1.0000000 sec  
 TDO 1

===== CHANNEL f1 =====  
 SF01 400.1324710 MHz  
 NUC1 1H  
 P1 10.00 usec  
 PLW1 16.0000000 W

F2 - Processing parameters  
 SI 65536  
 SF 400.1300000 MHz  
 WDW EM  
 SSB 0  
 LB 0.10 Hz  
 GB 0  
 PC 1.00

MARCO-10  
DEPTQ-BSU DMSO (C:\data) nmr 3

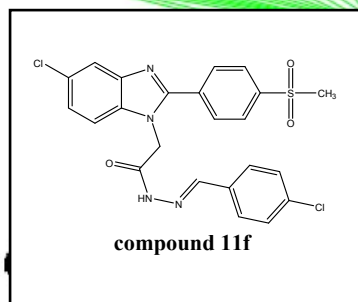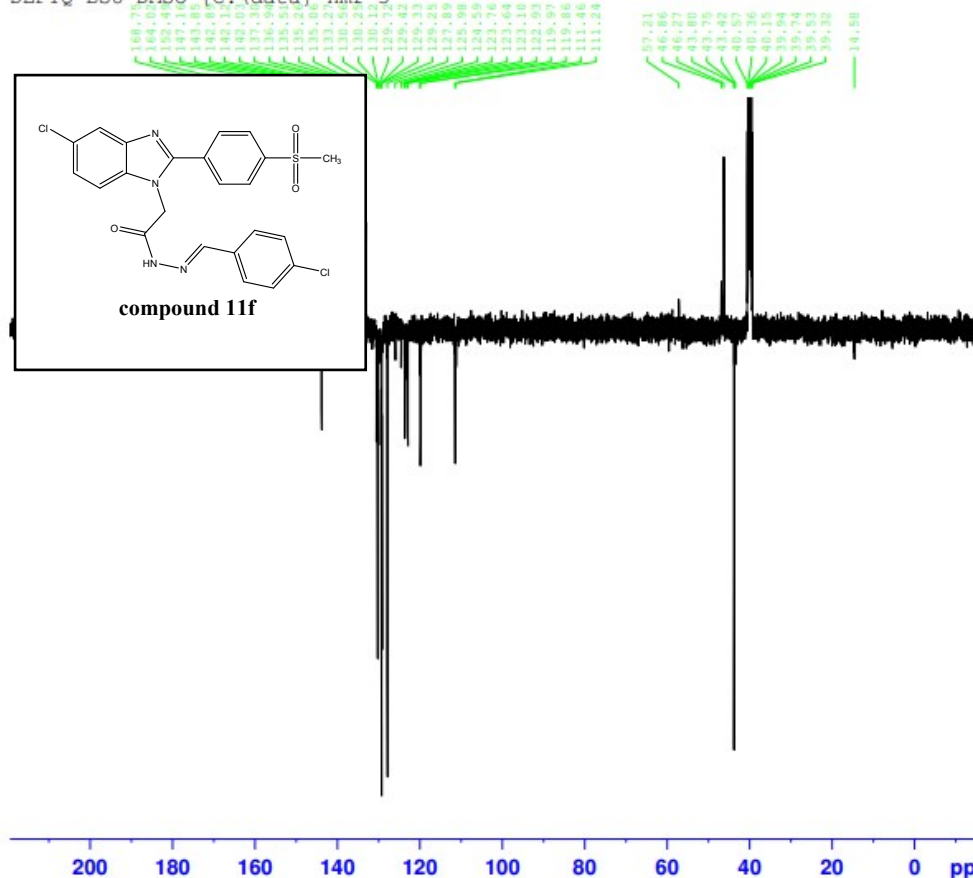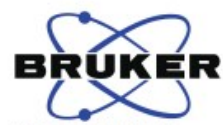

Current Data Parameters  
NAME Apr13-2017-nmr  
EXPNO 40  
PROCNO 1

F2 - Acquisition Parameters  
Date\_ 20170414  
Time 11.20  
INSTRUM spect  
PROBHD 5 mm PABBO BB/  
PULPROG zg30  
TD 65536  
SOLVENT DMSO  
NS 4000  
DS 4  
SWH 24038.461 Hz  
FIDRES 0.366798 Hz  
AQ 1.343188 sec  
RG 205.44  
DM 20.800 usec  
DE 6.50 usec  
TE 296.2 K  
CHST2 145.000000  
CHST12 1.500000  
D3 2.0000000 sec  
D2 0.00344828 sec  
D12 0.00020000 sec  
D16 0.00020000 sec  
TD0 3

===== CHANNEL f1 =====  
SFO1 100.6228303 MHz  
NUC1 13C  
P1 10.00 usec  
PL1 2000.00 usec  
PLW1 0 W  
SFO2 400.132797 MHz  
NUC2 1H  
CFPRG(2) waltz16  
P0 15.75 usec  
P3 10.50 usec  
P4 21.00 usec  
PCPD2 90.00 usec  
PLW2 16.0000000 W  
PLW12 0.21771999 W

===== GRADIENT CHANNEL =====  
GPRAM[1] SMC10.100  
GPRAM[2] SMC10.100  
GPRAM[3] SMC10.100  
GPI1 31.00 %  
GPI2 31.00 %  
GPI3 31.00 %  
P16 1000.00 usec

F2 - Processing parameters  
SI 32768  
SF 100.6127690 MHz  
WDW EM  
SSB 0  
LB 1.00 Hz  
GB 0  
PC 1.40

MARCO-CL10-D20  
PROTON\_BSU DMSO (C:\data) nmr 23

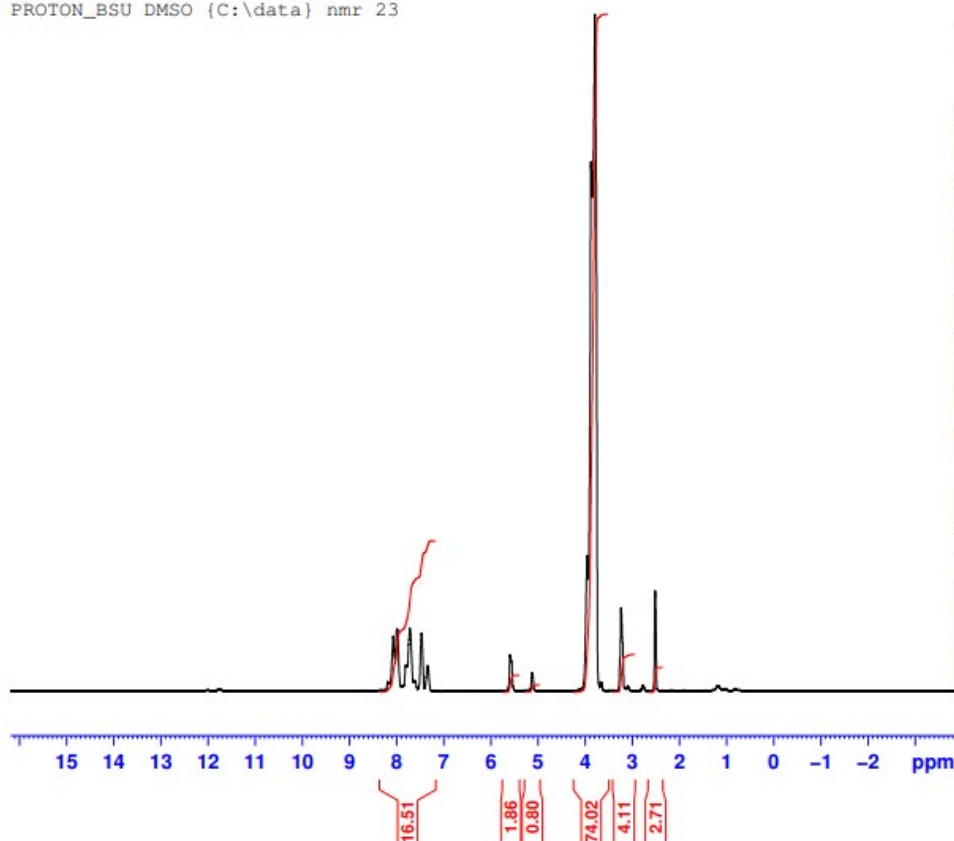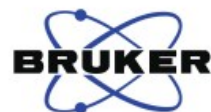

Current Data Parameters  
NAME Mar18-2017-nmr  
EXPNO 60  
PROCNO 1

F2 - Acquisition Parameters  
Date\_ 20170318  
Time 13.51  
INSTRUM spect  
PROBHD 5 mm PABBO BB/  
PULPROG zg30  
TD 65536  
SOLVENT DMSO  
NS 16  
DS 2  
SWH 8012.820 Hz  
FIDRES 0.122266 Hz  
AQ 4.0894465 sec  
RG 91.28  
DM 62.400 usec  
DE 6.50 usec  
TE 298.1 K  
D1 1.00000000 sec  
TD0 1

===== CHANNEL f1 =====  
SFO1 400.1324710 MHz  
NUC1 1H  
P1 10.00 usec  
PLW1 16.0000000 W

F2 - Processing parameters  
SI 65536  
SF 400.1300000 MHz  
WDW EM  
SSB 0  
LB 0.10 Hz  
GB 0  
PC 1.00

19. <sup>1</sup>H and <sup>13</sup>C NMR Spectra of 11g:

-CL2  
ON\_BSU DMSO

8.257  
8.151  
8.130

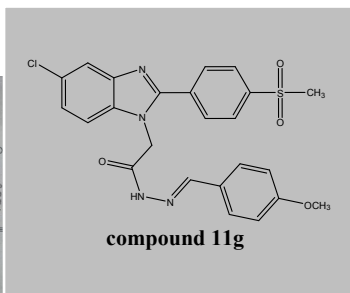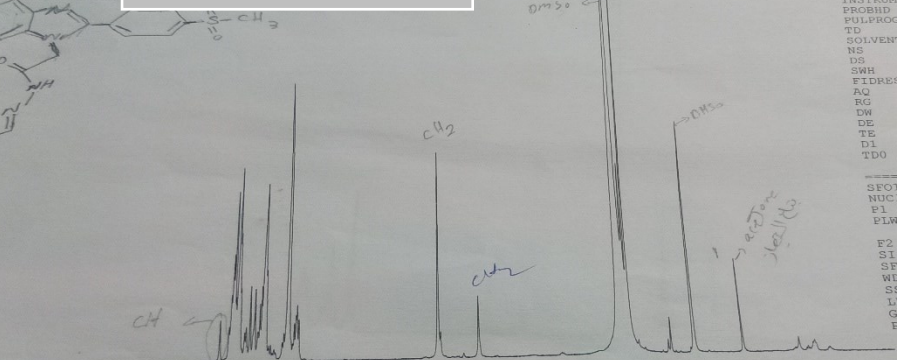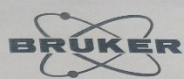

Current Data Parameters  
NAME Jan29-2017-nmr  
EXPNO 220  
PROCNO 1

F2 - Acquisition Parameters  
Date\_ 20170125  
Time 17.50  
INSTRUM spect  
PROBHD 5 mm PABBO BB/  
PULPROG zg30  
TD 65536  
SOLVENT DMSO  
NS 16  
DS 2  
SWH 8012.830 Hz  
FIDRES 0.122266 Hz  
AQ 4.0894465 sec  
RG 147.93  
RW 62.400 usec  
DE 6.50 usec  
TE 298.2 K  
D1 1.00000000 sec  
TDO 1

==== CHANNEL f1 =====

SE01 400.1324710 MHz  
NUC1 1H  
P1 10.00 usec  
PLW1 16.00000000 W  
F2 - Processing parameters  
SI 65536  
SF 400.1300000 MHz  
WDW EM  
SSB 0  
LB 0.10 Hz  
GB 0  
PC 1.00

10 9 8 7 6 5 4 3 2 1 ppm

0.33 3.11 3.32 1.53 4.38 4.16 1.28 2.10 0.65 14.31 1.93 3.37 2.27 0.50

...-CL2-D2O  
...OTON\_BSU DMSO

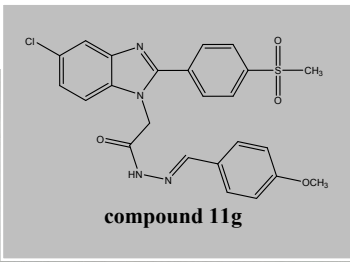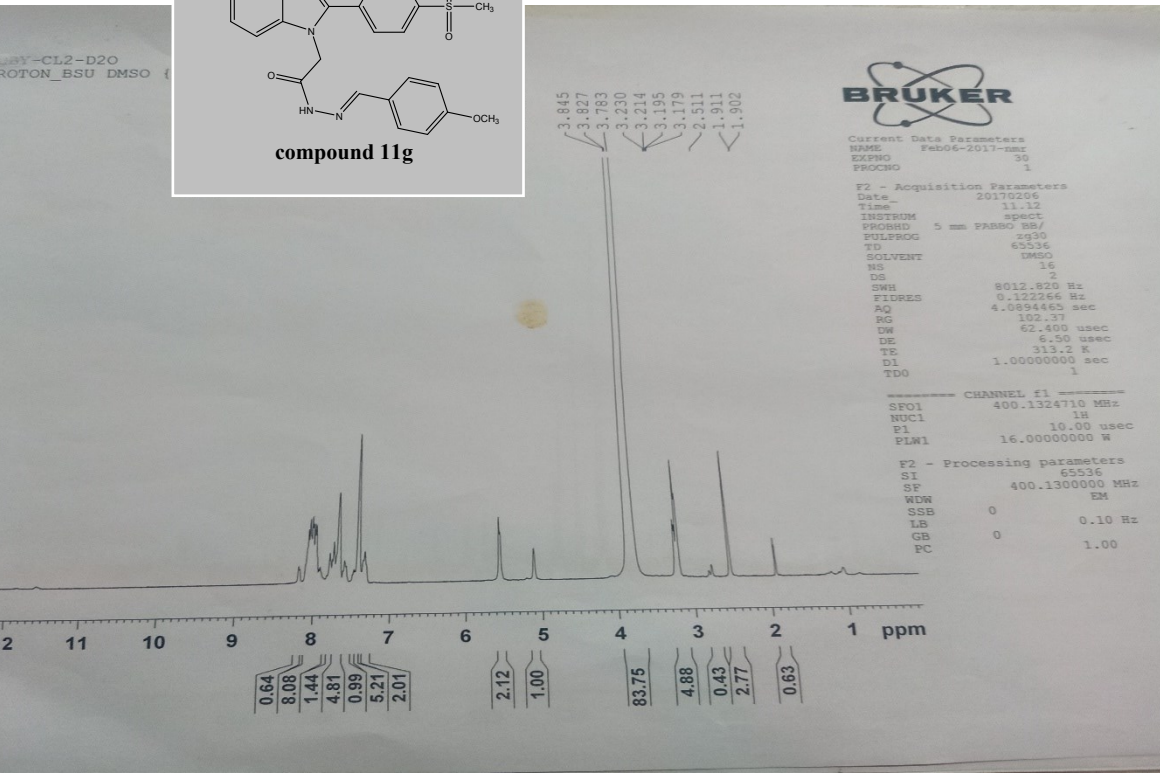



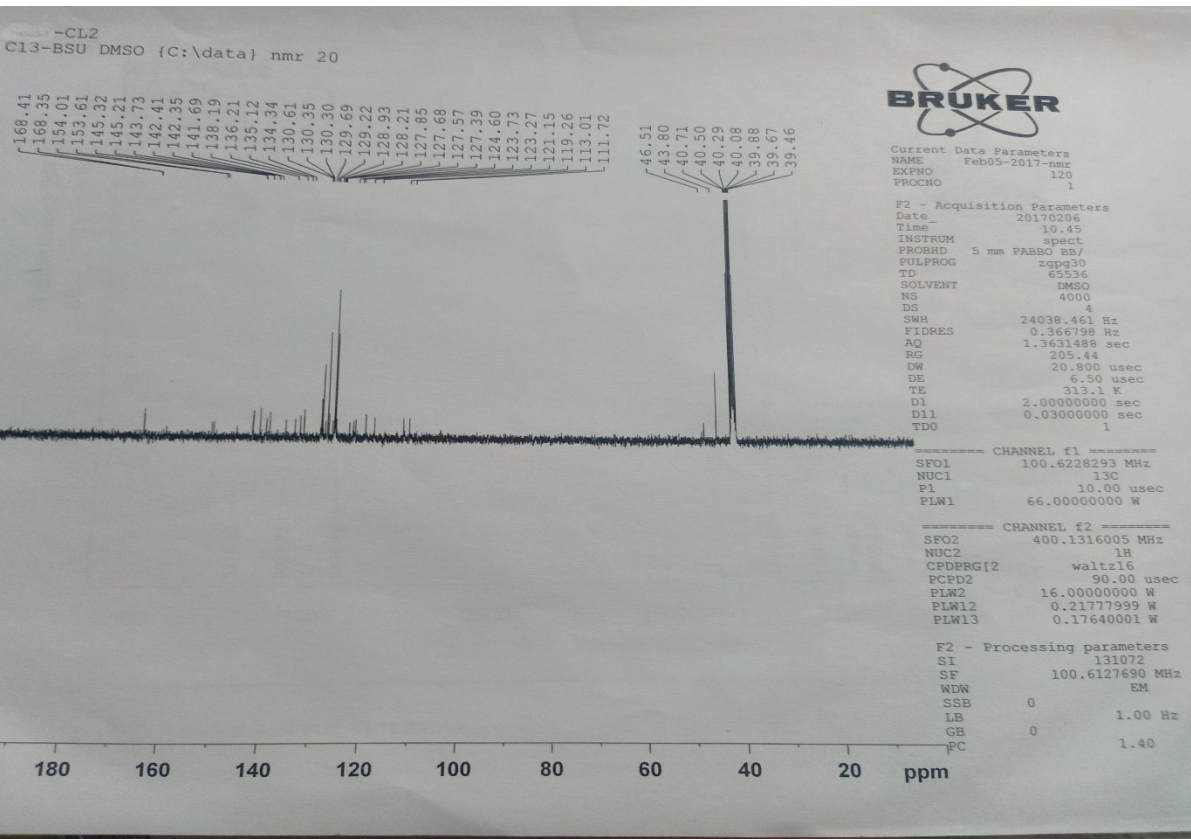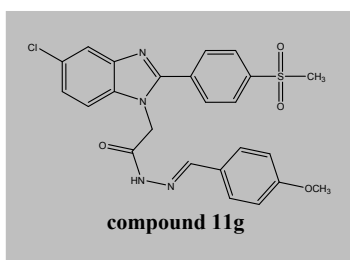

## 20. <sup>1</sup>H and <sup>13</sup>C NMR Spectra of 11h:

MARCO-CL8  
PROTON\_BSU DMSO [C:\data] nmr 4

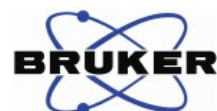

Current Data Parameters  
NAME Mar11-2017-nmr  
EXPNO 120  
PROCNO 1

F2 - Acquisition Parameters  
Date\_ 20170311  
Time 16.05  
INSTRUM spect  
PROBHD 5 mm PABBO BB/  
PULPROG zg30  
TD 65536  
SOLVENT DMSO  
NS 16  
DS 2  
SWH 8012.820 Hz  
FIDRES 0.122266 Hz  
AQ 4.0894465 sec  
RG 91.28  
DW 62.400 usec  
DE 6.50 usec  
TE 298.1 K  
D1 1.00000000 sec  
TD0 1

----- CHANNEL f1 -----  
SFO1 400.1324710 MHz  
NUC1 1H  
P1 10.00 usec  
PLW1 16.00000000 W

F2 - Processing parameters  
SI 65536  
SF 400.1300000 MHz  
WDW EM  
SSB 0  
LB 0.10 Hz  
GB 0  
PC 1.00

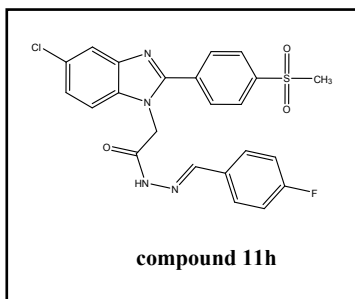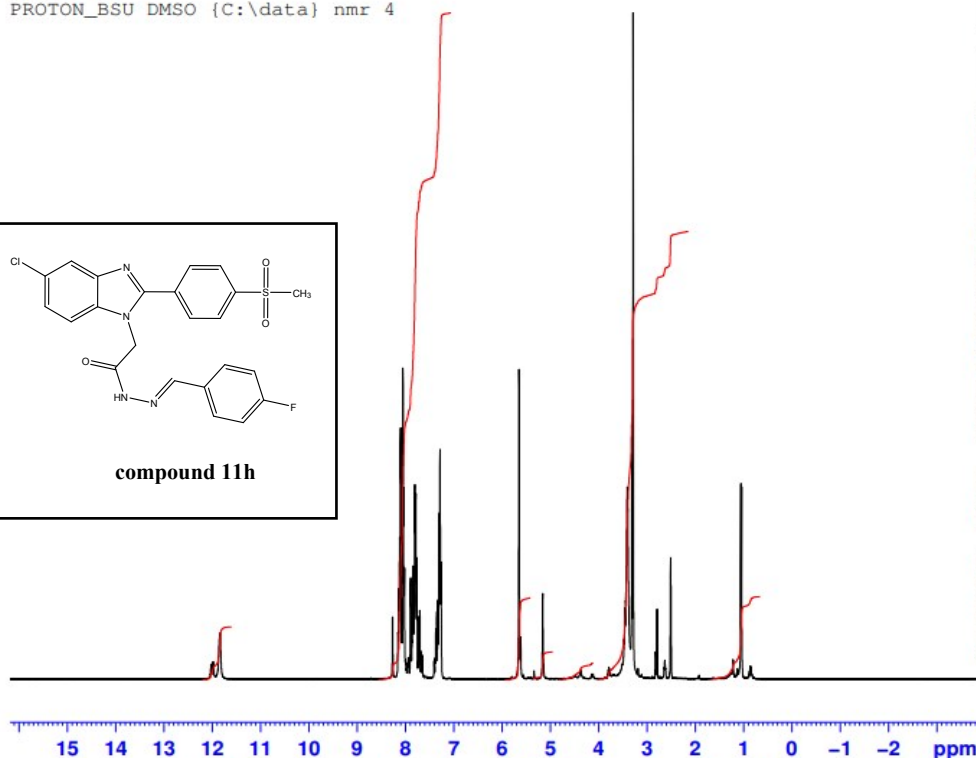

MARCO-CL-8  
C13-BSU DMSO [C:\data] nmr 10

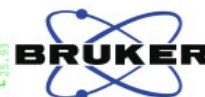

Current Data Parameters  
NAME Mar16-2017-nmr  
EXPNO 150  
PROCNO 1

F2 - Acquisition Parameters  
Date\_ 20170316  
Time 22.21  
INSTRUM spect  
PROBHD 5 mm PABBO BB/  
PULPROG zgpg30  
TD 65536  
SOLVENT DMSO  
NS 4000  
DS 4  
SWH 24038.461 Hz  
FIDRES 0.366798 Hz  
AQ 1.3631488 sec  
RG 205.44  
DW 20.800 usec  
DE 6.50 usec  
TE 298.1 K  
D1 2.00000000 sec  
D11 0.03000000 sec  
TD0 1

----- CHANNEL f1 -----  
SFO1 100.6228293 MHz  
NUC1 13C  
P1 10.00 usec  
PLW1 66.00000000 W

----- CHANNEL f2 -----  
SFO2 400.1316005 MHz  
NUC2 1H  
CPDPRG2 waltz16  
PCPD2 90.00 usec  
PLW2 16.00000000 W  
PLW12 0.21777999 W  
PLW13 0.17640001 W

F2 - Processing parameters  
SI 131072  
SF 100.6127690 MHz  
WDW EM  
SSB 0  
LB 1.00 Hz  
GB 0  
PC 1.40

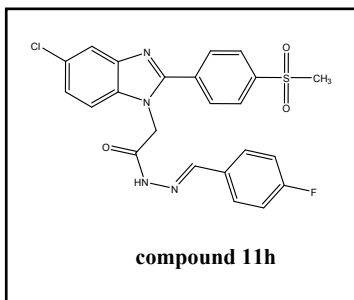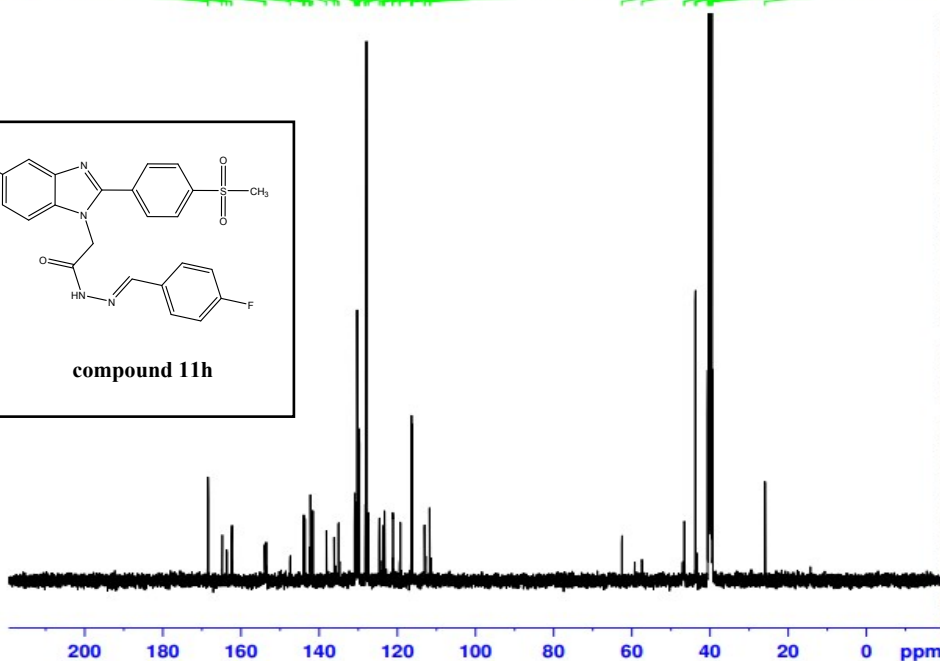

MARCO-CL8-D20  
PROTON\_BSU DMSO (C:\data) nmr 3

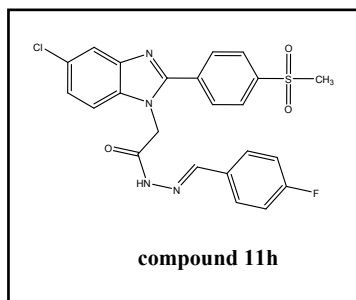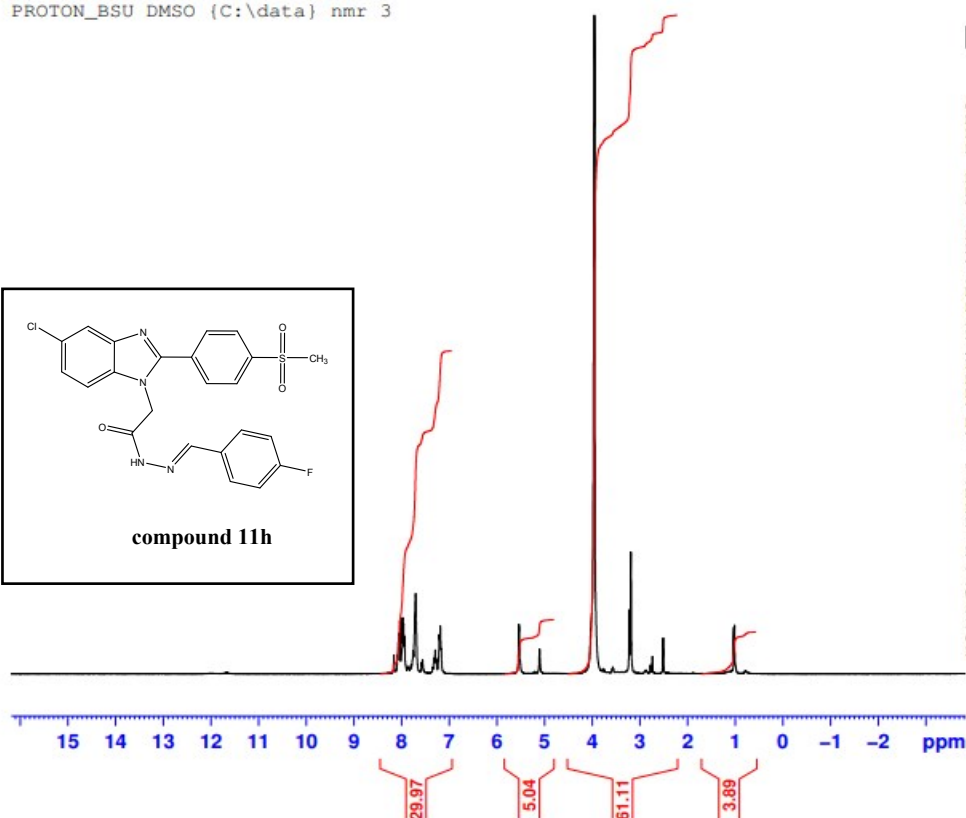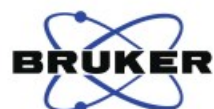

Current Data Parameters  
NAME Mar18-2017-nmr  
EXPNO 100  
PROCNO 1

F2 - Acquisition Parameters  
Date\_ 20170318  
Time 14.13  
INSTRUM spect  
PROBHD 5 mm PABBO BB/  
PULPROG zg30  
TD 65536  
SOLVENT DMSO  
NS 16  
DS 2  
SWH 8012.820 Hz  
FIDRES 0.122266 Hz  
AQ 4.0894465 sec  
RG 91.28  
DW 62.400 usec  
DE 6.50 usec  
TE 298.1 K  
D1 1.0000000 sec  
TD0 1

==== CHANNEL f1 =====  
SFO1 400.1324710 MHz  
NUC1 1H  
P1 10.00 usec  
PLW1 16.0000000 W

F2 - Processing parameters  
SI 65536  
SF 400.1300000 MHz  
WDW EM  
SSB 0  
LB 0.10 Hz  
GB 0  
PC 1.00

## 21. <sup>1</sup>H Spectra of 11i:

AHMED S-M2  
PROTON\_BSU DMSO (C:\data) nmr 16

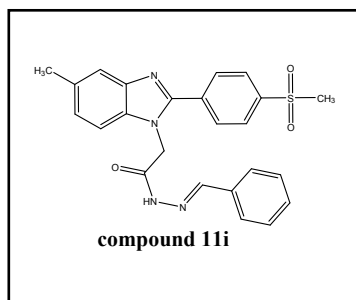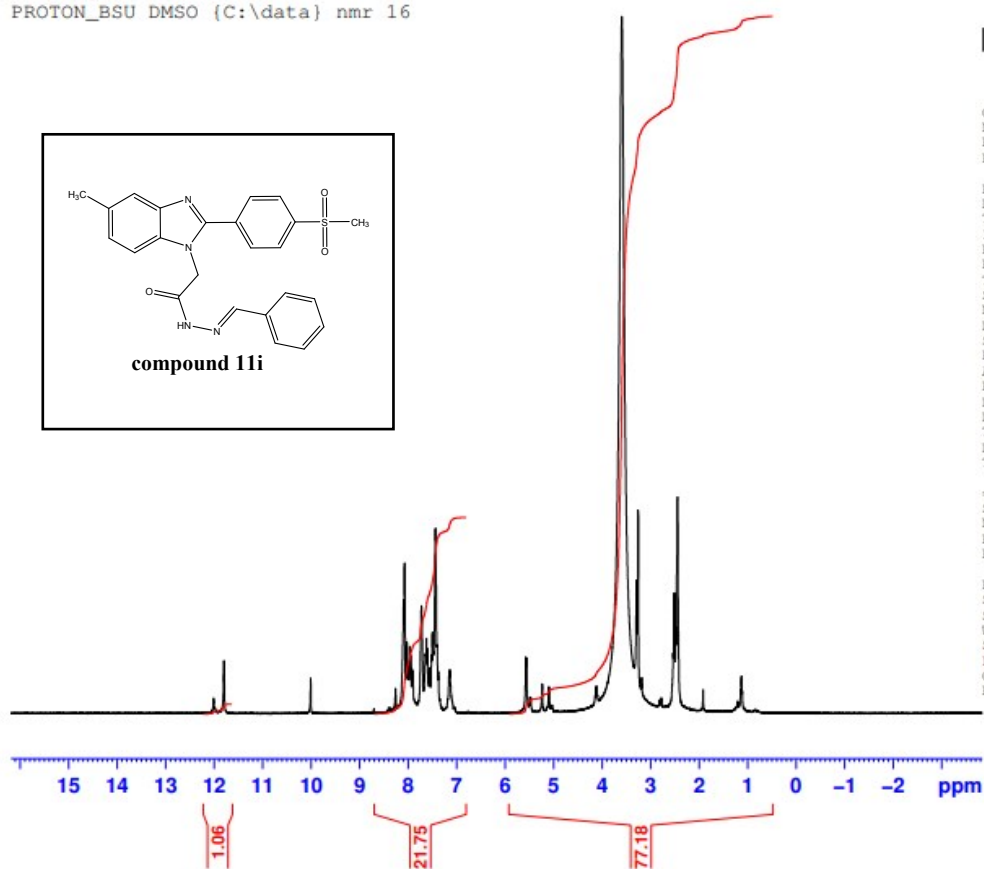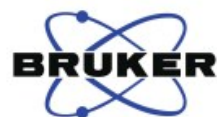

Current Data Parameters  
NAME Jul19-2017-nmr  
EXPNO 30  
PROCNO 1

F2 - Acquisition Parameters  
Date\_ 20170719  
Time 14.05  
INSTRUM spect  
PROBHD 5 mm PABBO BB/  
PULPROG zg30  
TD 65536  
SOLVENT DMSO  
NS 16  
DS 2  
SWH 8012.820 Hz  
FIDRES 0.122266 Hz  
AQ 4.0894465 sec  
RG 74.78  
DW 62.400 usec  
DE 6.50 usec  
TE 298.3 K  
D1 1.0000000 sec  
TD0 1

==== CHANNEL f1 =====  
SFO1 400.1324710 MHz  
NUC1 1H  
P1 10.00 usec  
PLW1 16.0000000 W

F2 - Processing parameters  
SI 65536  
SF 400.1300000 MHz  
WDW EM  
SSB 0  
LB 0.10 Hz  
GB 0  
PC 1.00



AHMED S - M2 (D2O)  
PROTON\_BSU DMSO {C:\data} nmr 8

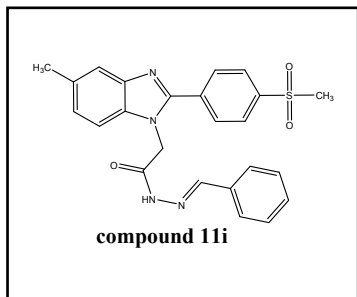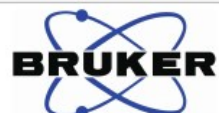

Current Data Parameters  
NAME Jul29-2017-nmr  
EXPNO 30  
PROCNO 1

F2 - Acquisition Parameters  
Date\_ 20170729  
Time 12.19  
INSTRUM spect  
FROBHD 5 mm PABBO BB/  
PULPROG zg30  
TD 65536  
SOLVENT DMSO  
NS 16  
DS 2  
SWH 8012.820 Hz  
FIDRES 0.122266 Hz  
AQ 4.0894465 sec  
RG 66.73  
DW 62.400 usec  
DE 6.50 usec  
TE 306.9 K  
D1 1.00000000 sec  
TD0 1

----- CHANNEL f1 -----  
SF01 400.1324710 MHz  
NUC1 1H  
F1 10.00 usec  
PLW1 16.00000000 W

F2 - Processing parameters  
SI 65536  
SF 400.1300000 MHz  
WDW EM  
SSB 0  
LB 0.10 Hz  
GB 0  
PC 1.00

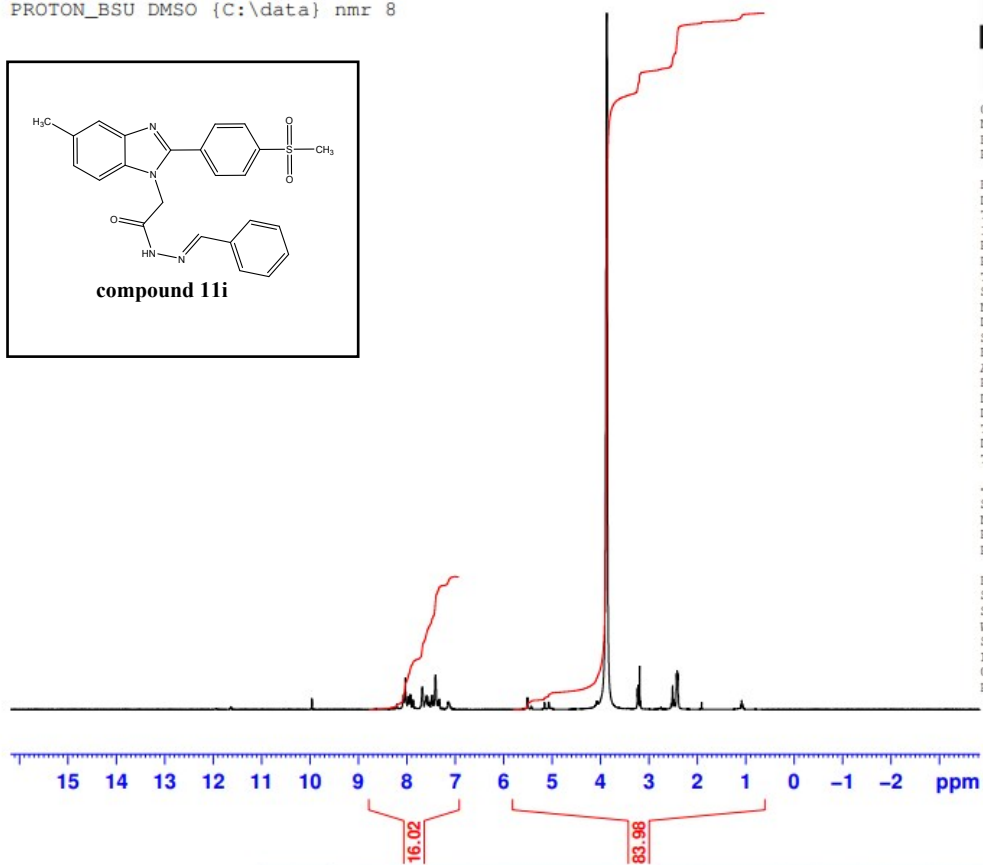

## 22. <sup>1</sup>H and <sup>13</sup>C NMR Spectra of 11j:

MOHAMED-11J  
PROTON\_BSUS DMSO {C:\data} abeer 17

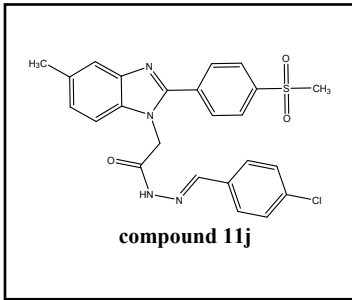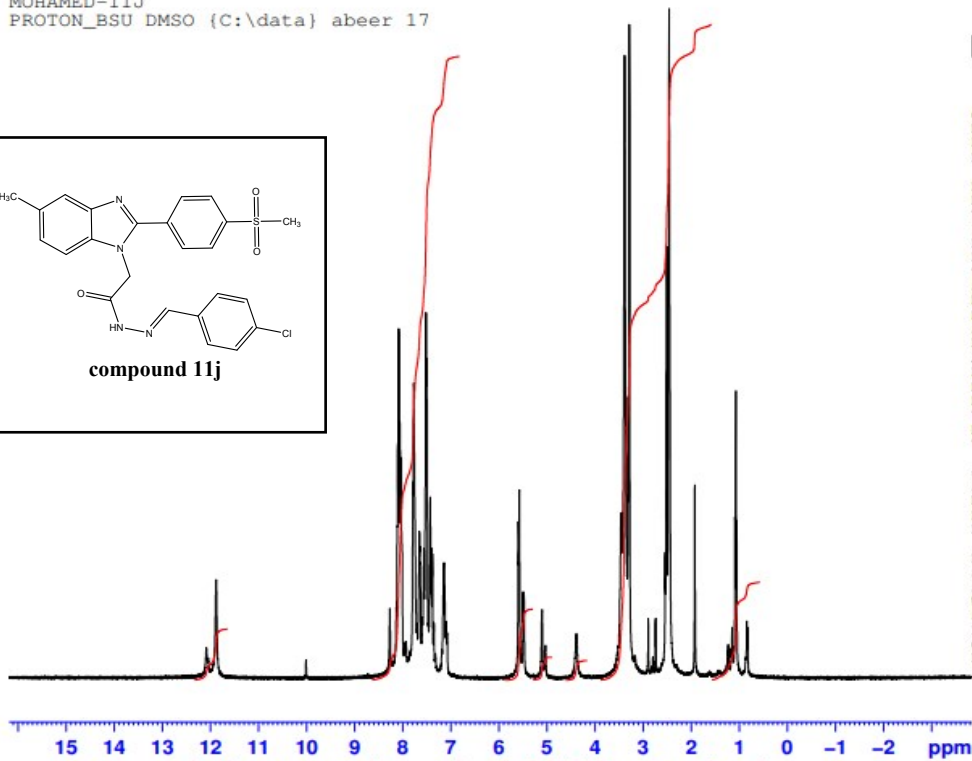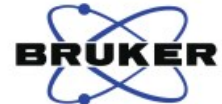

Current Data Parameters  
NAME Apr05-2021-abeer  
EXPNO 90  
PROCNO 1

F2 - Acquisition Parameters  
Date\_ 20210405  
Time 10.19  
INSTRUM spect  
PROBHD 5 mm PABBO BB/  
PULPROG zg30  
TD 65536  
SOLVENT DMSO  
NS 16  
DS 2  
SWH 8012.820 Hz  
FIDRES 0.122266 Hz  
AQ 4.0894465 sec  
RG 147.93  
DW 62.400 usec  
DE 6.50 usec  
TE 296.7 K  
D1 1.0000000 sec  
TD0 1

===== CHANNEL f1 =====  
SFO1 400.1324710 MHz  
NUC1 1H  
P1 10.00 usec  
PLW1 16.0000000 W

F2 - Processing parameters  
SI 65536  
SF 400.1300000 MHz  
WDW EM  
SSB 0  
LB 0.10 Hz  
GB 0  
PC 1.00

MOHAMED-11J  
C13-BSUS DMSO {C:\data} abeer 18

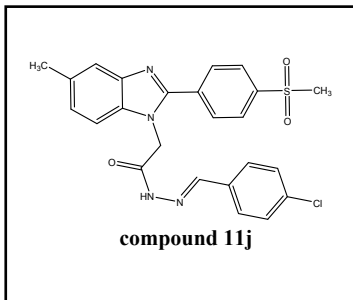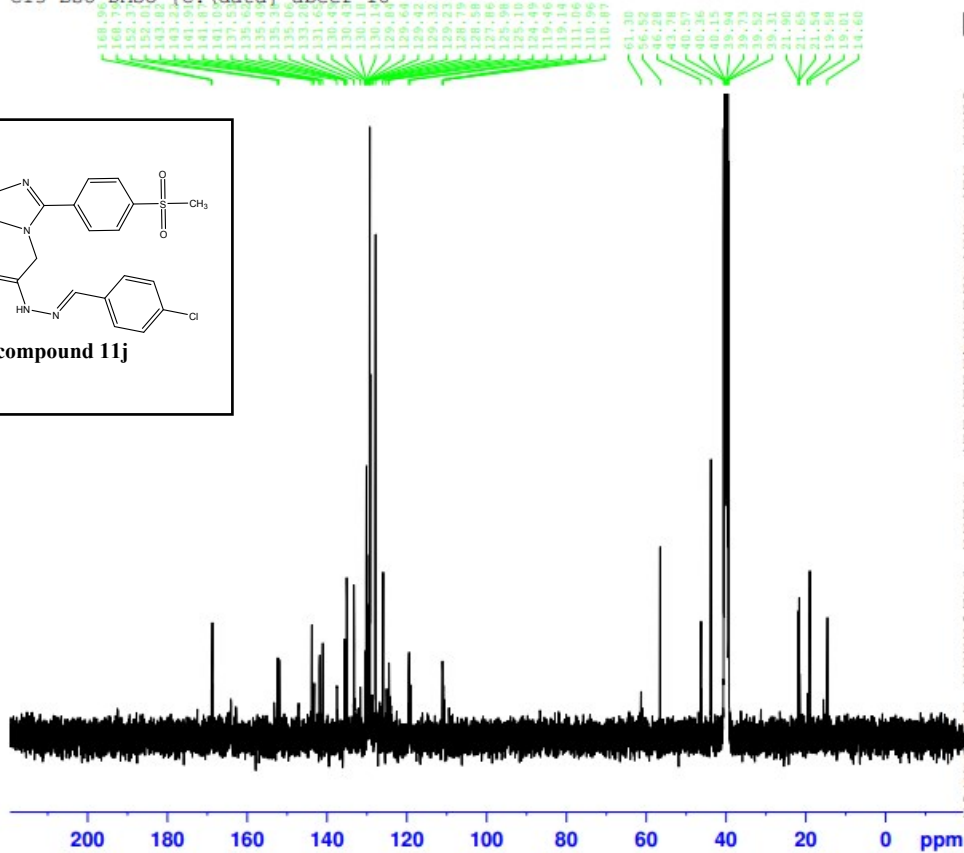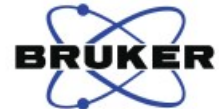

Current Data Parameters  
NAME Apr08-2021-abeer  
EXPNO 170  
PROCNO 1

F2 - Acquisition Parameters  
Date\_ 20210409  
Time 10.10  
INSTRUM spect  
PROBHD 5 mm PABBO BB/  
PULPROG zgpg30  
TD 65536  
SOLVENT DMSO  
NS 4000  
DS 4  
SWH 24038.461 Hz  
FIDRES 0.366798 Hz  
AQ 1.3631488 sec  
RG 205.44  
DW 20.800 usec  
DE 6.50 usec  
TE 297.5 K  
D1 2.0000000 sec  
D11 0.0300000 sec  
TD0 1

===== CHANNEL f1 =====  
SFO1 100.6228293 MHz  
NUC1 13C  
P1 10.00 usec  
PLW1 66.0000000 W

===== CHANNEL f2 =====  
SFO2 400.1316005 MHz  
NUC2 1H  
CPDPRG2 waltz16  
PCPD2 90.00 usec  
PLW2 16.0000000 W  
PLW12 0.21777999 W  
PLW13 0.17640001 W

F2 - Processing parameters  
SI 131072  
SF 100.6127690 MHz  
WDW EM  
SSB 0  
LB 1.00 Hz  
GB 0  
PC 1.40

### 23. <sup>1</sup>H Spectra of 11k:

PROTON\_BSU DMSO {C:\data} nmr 20

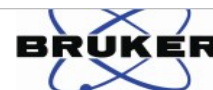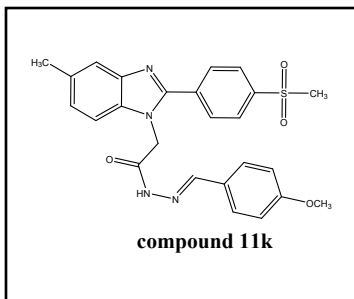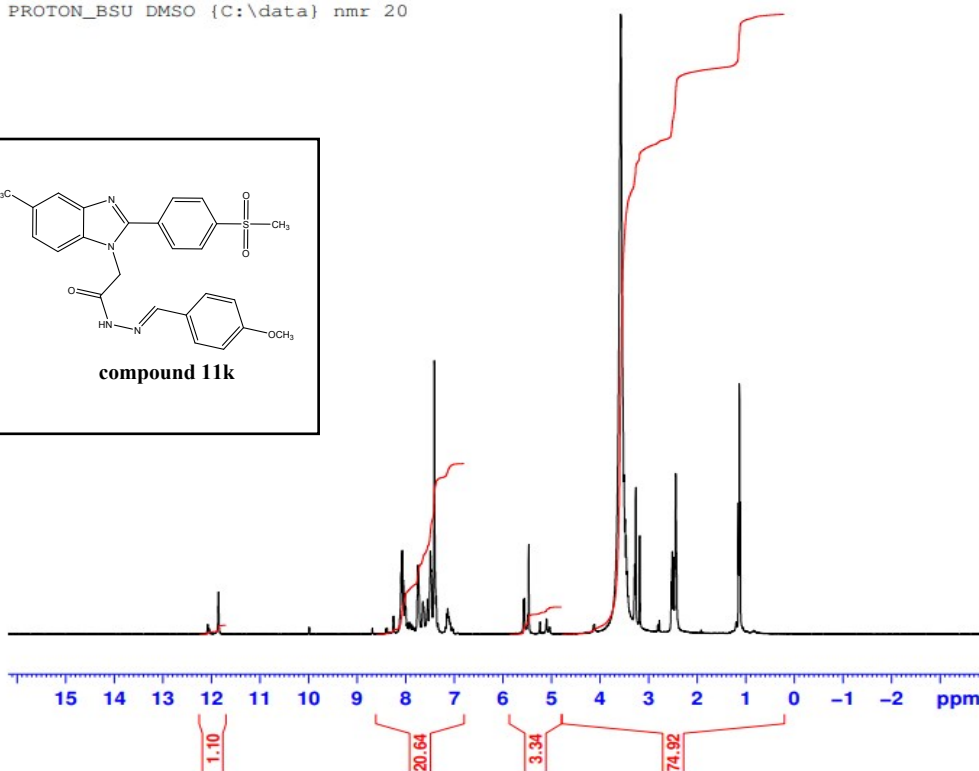

Current Data Parameters  
 NAME Jul19-2017-nmr  
 EXPNO 70  
 PROCNO 1

F2 - Acquisition Parameters  
 Date\_ 20170719  
 Time 15.18  
 INSTRUM spect  
 PROBHD 5 mm PABBO BB/  
 PULPROG zg30  
 TD 65536  
 SOLVENT DMSO  
 NS 16  
 DS 2  
 SWH 8012.820 Hz  
 FIDRES 0.122266 Hz  
 AQ 4.0894465 sec  
 RG 74.78  
 DW 62.400 usec  
 DE 6.50 usec  
 TE 298.9 K  
 D1 1.00000000 sec  
 TD0 1

----- CHANNEL f1 -----  
 SFO1 400.1324710 MHz  
 NUC1 1H  
 P1 10.00 usec  
 PLW1 16.00000000 W

F2 - Processing parameters  
 SI 65536  
 SF 400.1300000 MHz  
 WDW EM  
 SSB 0  
 LB 0.10 Hz  
 GB 0  
 PC 1.00

AHMED S - M10 (D2O)  
 PROTON\_BSU DMSO {C:\data} nmr 10

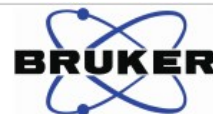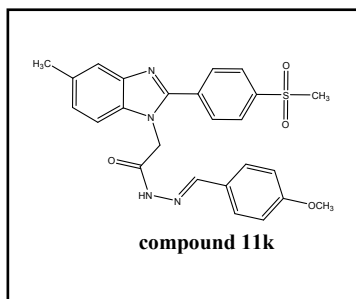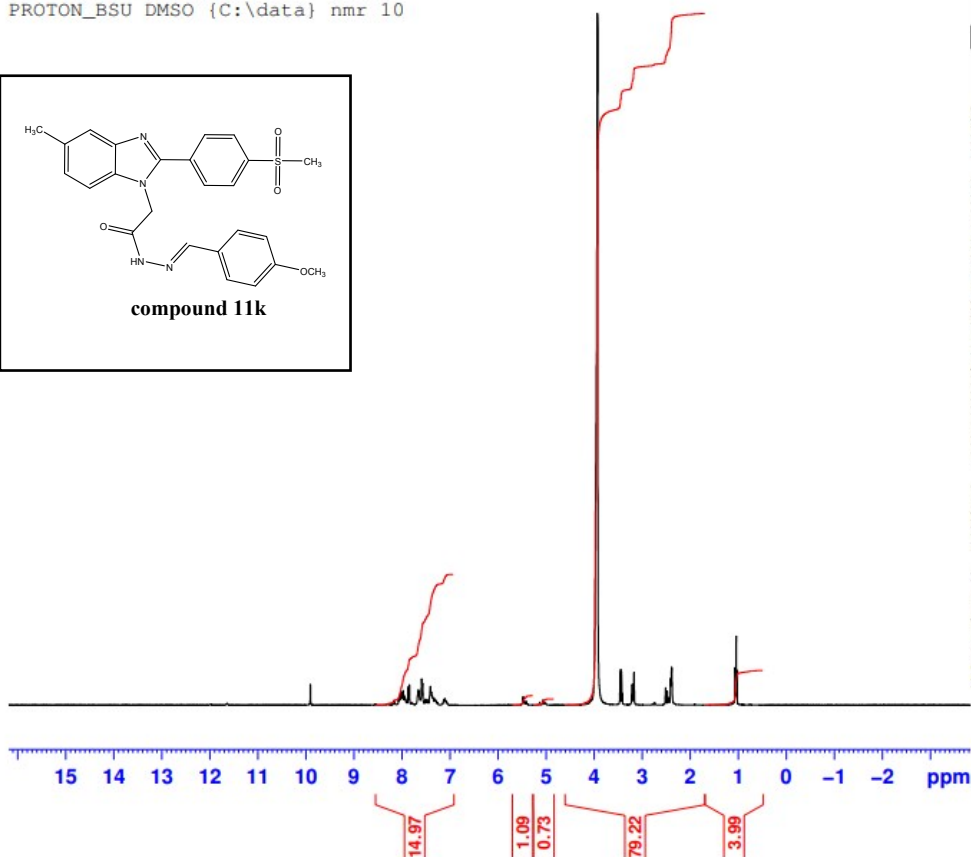

Current Data Parameters  
 NAME Jul29-2017-nmr  
 EXPNO 50  
 PROCNO 1

F2 - Acquisition Parameters  
 Date\_ 20170729  
 Time 12.27  
 INSTRUM spect  
 PROBHD 5 mm PABBO BB/  
 PULPROG zg30  
 TD 65536  
 SOLVENT DMSO  
 NS 16  
 DS 2  
 SWH 8012.820 Hz  
 FIDRES 0.122266 Hz  
 AQ 4.0894465 sec  
 RG 66.73  
 DW 62.400 usec  
 DE 6.50 usec  
 TE 308.0 K  
 D1 1.00000000 sec  
 TD0 1

----- CHANNEL f1 -----  
 SFO1 400.1324710 MHz  
 NUC1 1H  
 P1 10.00 usec  
 PLW1 16.00000000 W

F2 - Processing parameters  
 SI 65536  
 SF 400.1300000 MHz  
 WDW EM  
 SSB 0  
 LB 0.10 Hz  
 GB 0  
 PC 1.00

## 24. <sup>1</sup>H and <sup>13</sup>C NMR Spectra of 111:

AHMED S-M 8  
PROTON\_BSU DMSO {C:\data} nmr 19

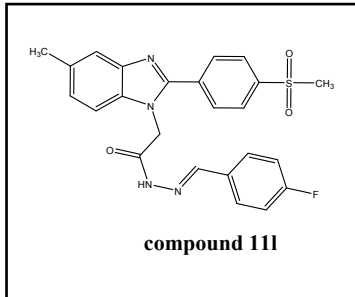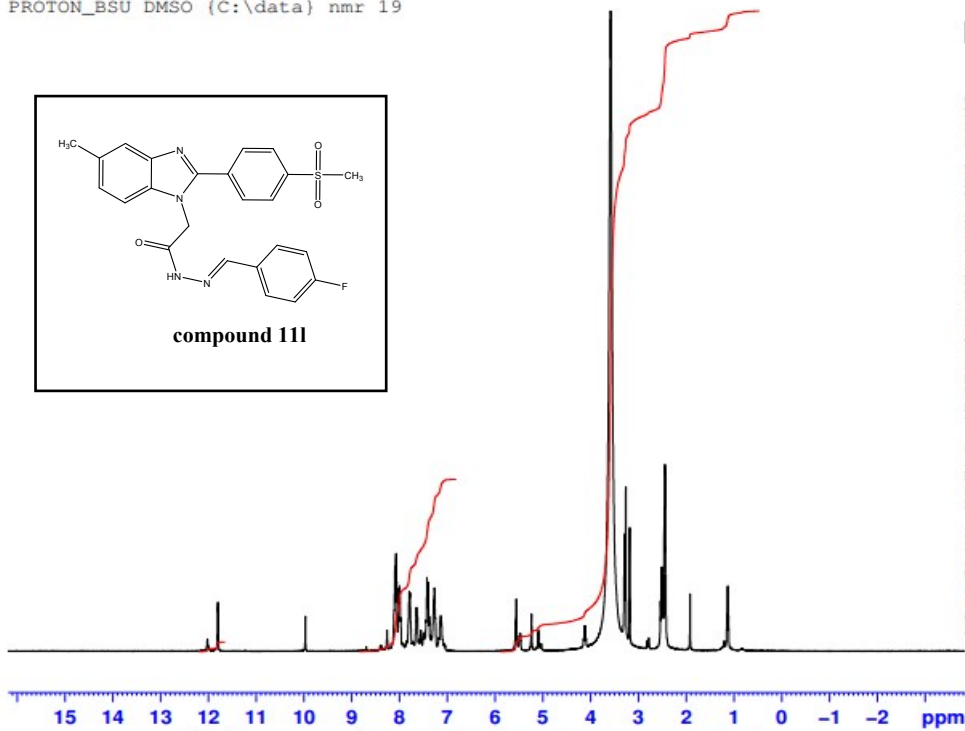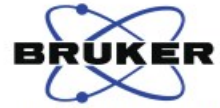

Current Data Parameters  
NAME Jul19-2017-nmr  
EXPNO 60  
PROCNO 1

F2 - Acquisition Parameters  
Date\_ 20170719  
Time 15.14  
INSTRUM spect  
PROBHD 5 mm FAPBO BB/  
PULPROG zg30  
TD 65536  
SOLVENT DMSO  
NS 16  
DS 2  
SWH 8012.820 Hz  
FIDRES 0.122266 Hz  
AQ 4.0894465 sec  
RG 74.78  
DW 62.400 usec  
DE 6.50 usec  
TE 298.9 K  
D1 1.0000000 sec  
TD0 1

===== CHANNEL f1 =====  
SFO1 400.1324710 MHz  
NUC1 1H  
P1 10.00 usec  
PLW1 16.0000000 W

F2 - Processing parameters  
SI 65536  
SF 400.1300000 MHz  
WDW EM  
SSB 0  
LB 0.10 Hz  
GB 0  
PC 1.00

AHMED S- M8  
DEPTQ-BSU DMSO {C:\data} nmr 21

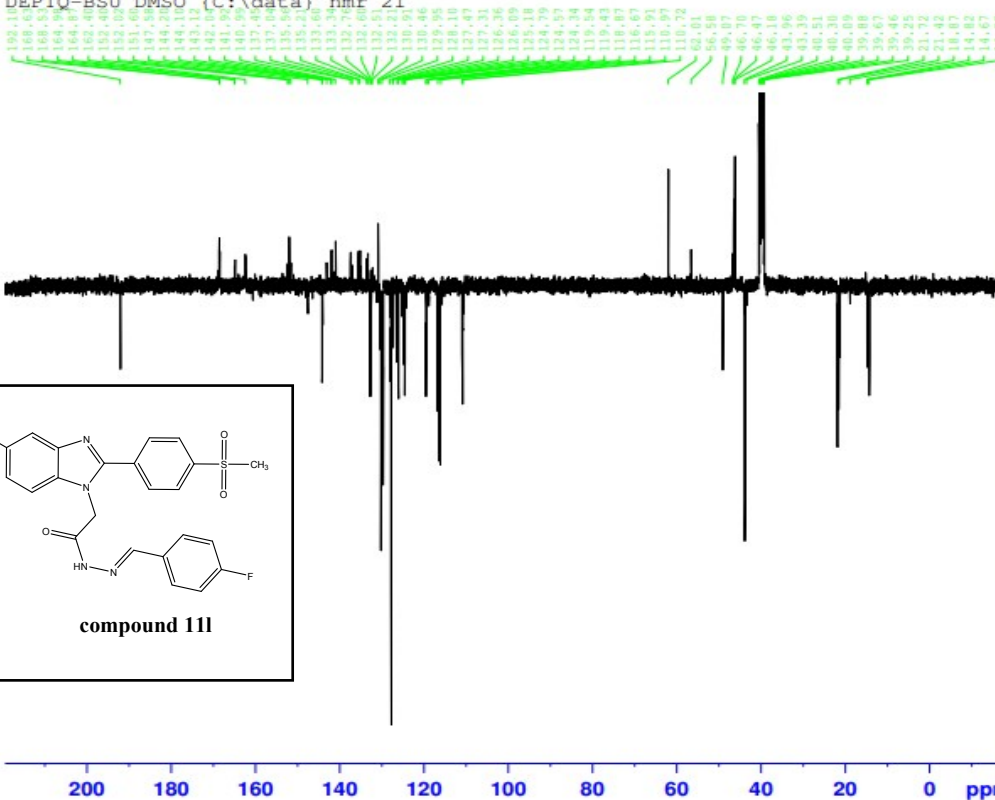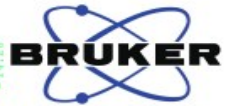

Current Data Parameters  
NAME Jul19-2017-nmr  
EXPNO 30  
PROCNO 1

F2 - Acquisition Parameters  
Date\_ 20170731  
Time 22.26  
INSTRUM spect  
PROBHD 5 mm FAPBO BB/  
PULPROG deptq002  
TD 65536  
SOLVENT DMSO  
NS 4000  
DS 4  
SWH 24038.448 Hz  
FIDRES 0.366798 Hz  
AQ 1.3631488 sec  
RG 205.44  
DW 20.800 usec  
DE 6.50 usec  
TE 313.1 K  
CMST2 145.000000  
CMST12 1.300000  
D1 2.0000000 sec  
D2 0.00344828 sec  
D12 0.00002000 sec  
D16 0.00020000 sec  
TD0 1

===== CHANNEL f1 =====  
SFO1 100.6228303 MHz  
NUC1 13C  
P1 10.00 usec  
PLW1 2000.00 usec  
PLW2 0 W  
PLW3 66.0000000 W  
SFOFF5 Ccpd0comp. 4  
SFOFF5 0 Hz  
SFOFF5 10.08399963 W

===== CHANNEL f2 =====  
SFO2 400.1312797 MHz  
NUC2 1H  
CPDPRG2 waltz16  
P2 15.75 usec  
P3 10.50 usec  
P4 21.00 usec  
PCPD2 90.00 usec  
PLW2 16.0000000 W  
PLW12 0.21177999 W

===== GRADIENT CHANNEL =====  
GPNAM[1] SREG0.100  
GPNAM[2] SREG0.100  
GPNAM[3] SREG0.100  
GPE1 31.00 %  
GPE2 31.00 %  
GPE3 31.00 %  
P16 1000.00 usec

F2 - Processing parameters  
SI 32768  
SF 100.6127690 MHz  
WDW EM  
SSB 0  
LB 0.10 Hz  
GB 0  
PC 1.40

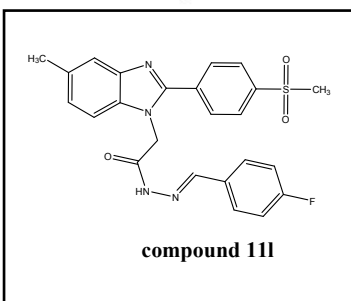

# 25. <sup>1</sup>H and <sup>13</sup>C NMR Spectra of 12a:

MOHAMED-12a  
 PROTON\_BSU DMSO {C:\data} abeer 12

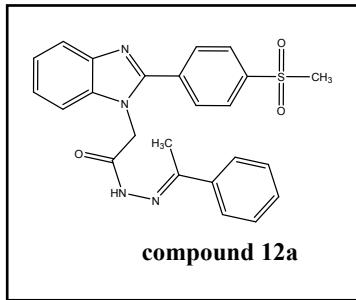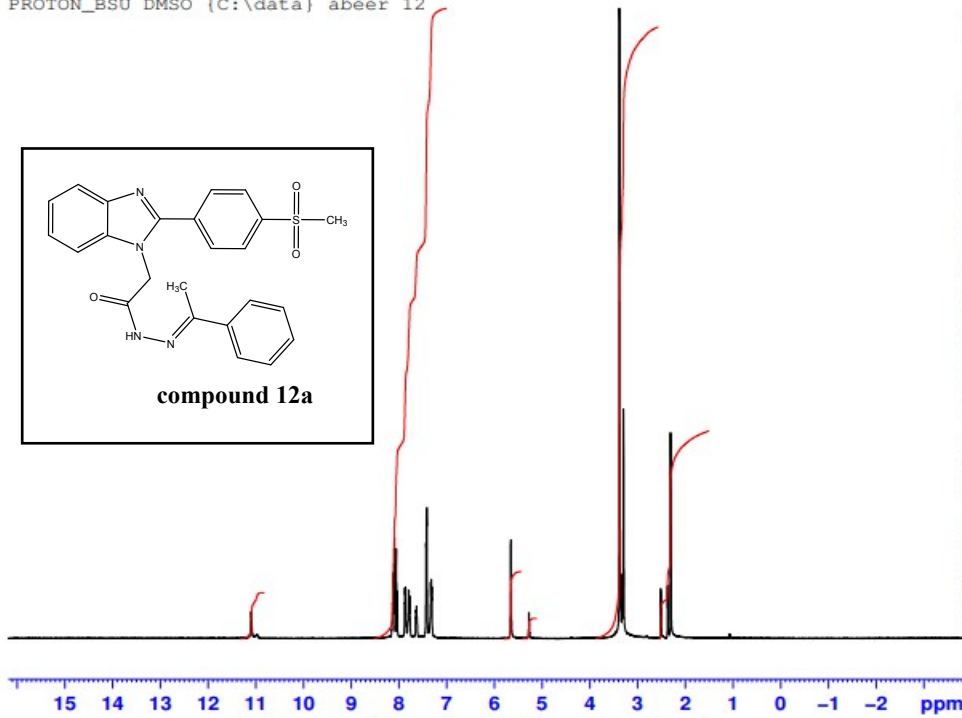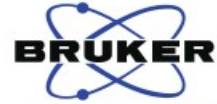

Current Data Parameters  
 NAME Apr06-2021-abeer  
 EXPNO 60  
 PROCNO 1

F2 - Acquisition Parameters  
 Date\_ 20210406  
 Time 9.44  
 INSTRUM spect  
 PROBHD 5 mm PABBO BB/  
 PULPROG zg30  
 TD 65536  
 SOLVENT DMSO  
 NS 16  
 DS 2  
 SWH 8012.820 Hz  
 FIDRES 0.122266 Hz  
 AQ 4.0894465 sec  
 RG 147.93  
 DW 62.400 usec  
 DE 6.50 usec  
 TE 296.6 K  
 D1 1.00000000 sec  
 TDO 1

===== CHANNEL f1 =====  
 SFO1 400.1324710 MHz  
 NUC1 1H  
 P1 10.00 usec  
 PLW1 16.00000000 W

F2 - Processing parameters  
 SI 65536  
 SF 400.1300000 MHz  
 WDW EM  
 SSB 0  
 LB 0.10 Hz  
 GB 0  
 PC 1.00

MOHAMED-12a  
 DEPTQ-BSU DMSO {C:\data} abeer 21

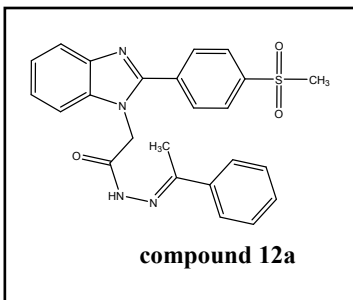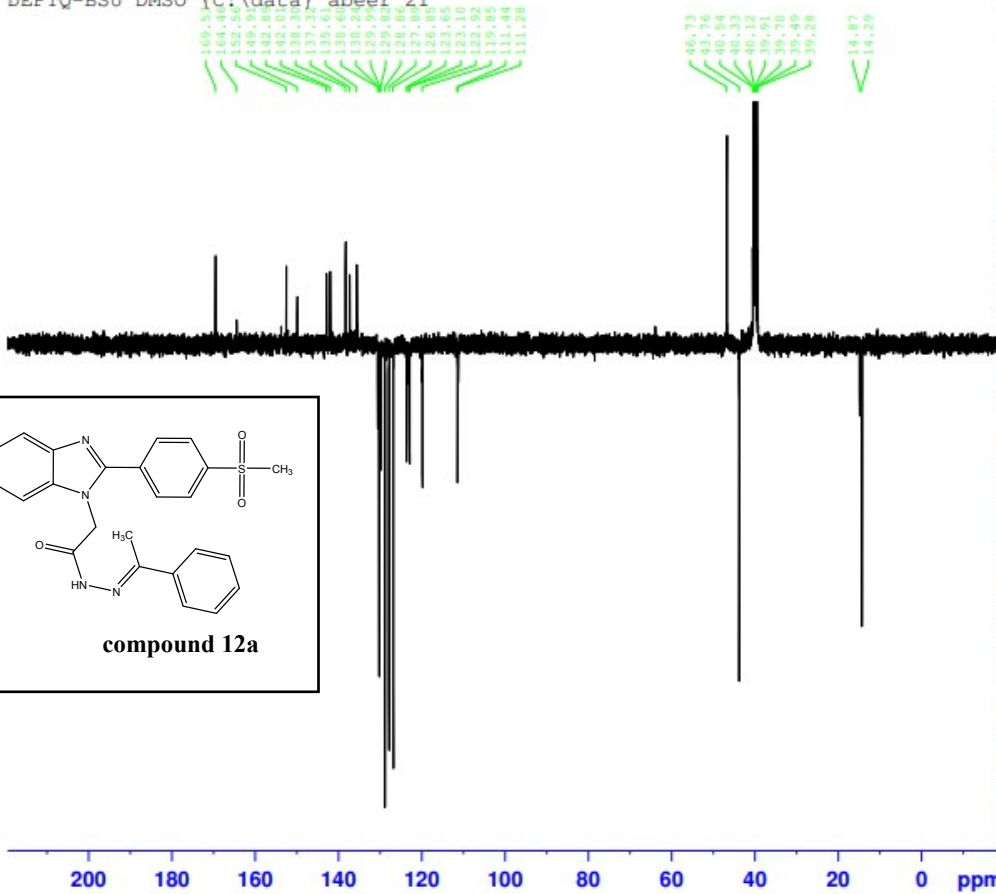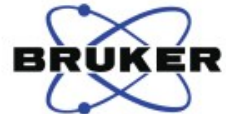

Current Data Parameters  
 NAME April-2021-abeer  
 EXPNO 50  
 PROCNO 1

F2 - Acquisition Parameters  
 Date\_ 20210411  
 Time 9.34  
 INSTRUM spect  
 PROBHD 5 mm PABBO BB/  
 PULPROG deptq  
 TD 65536  
 SOLVENT DMSO  
 NS 4000  
 DS 4  
 SWH 24038.461 Hz  
 FIDRES 0.136798 Hz  
 AQ 1.3431488 sec  
 RG 205.44  
 DW 20.800 usec  
 DE 6.50 usec  
 TE 297.1 K  
 INST2 145.000000  
 CHST12 1.500000  
 D1 2.0000000 sec  
 D2 0.00344828 sec  
 D12 0.0002000 sec  
 D16 0.0002000 sec  
 TDO 1

===== CHANNEL f1 =====  
 SFO1 100.6228303 MHz  
 NUC1 13C  
 P1 10.00 usec  
 PL13 2000.00 usec  
 PLW1 0 W  
 PLW1 66.00000000 W  
 SPNAM(5) Crp40comp.4  
 SFOAL5 0.500  
 SFOFT55 0 Hz  
 SPW5 10.08399963 W

===== CHANNEL f2 =====  
 SFO2 400.1321797 MHz  
 NUC2 1H  
 CPDPRG2 waltz16  
 P0 15.75 usec  
 P3 10.50 usec  
 P4 21.00 usec  
 PCPD2 90.00 usec  
 PLW2 16.00000000 W  
 PLW12 0.21777999 W

===== GRADIENT CHANNEL =====  
 GPNAM[1] SMCQ10.100  
 GPNAM[2] SMCQ10.100  
 GPNAM[3] SMCQ10.100  
 GPZ1 31.00 %  
 GPZ2 31.00 %  
 GPZ3 31.00 %  
 P16 1000.00 usec

F2 - Processing parameters  
 SI 32768  
 SF 100.6127690 MHz  
 MCM RM  
 SSB 0  
 LB 1.00 Hz  
 GB 0  
 PC 1.40



## 26. <sup>1</sup>H and <sup>13</sup>C NMR Spectra of 12b:

AHMED-1A  
PROTON\_BSU DMSO {C:\data} nmr 17

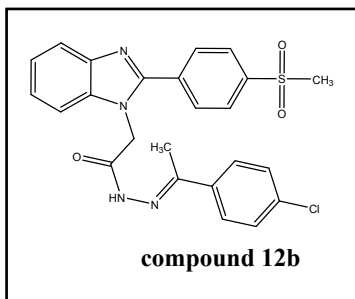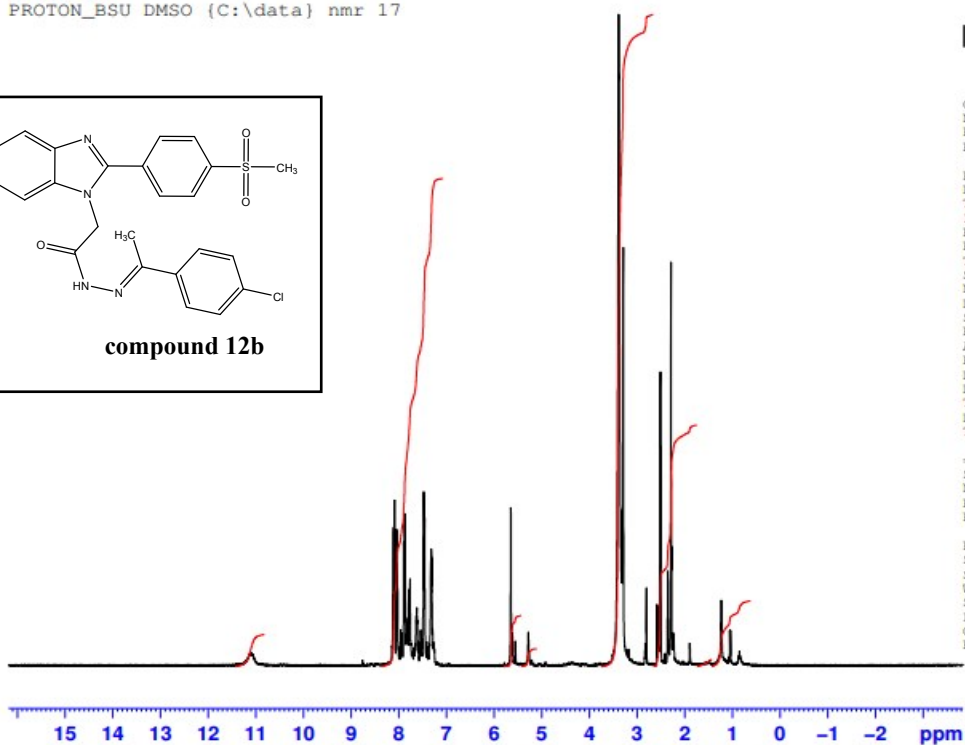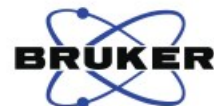

Current Data Parameters  
NAME Jan25-2017-nmr  
EXPNO 40  
PROCNO 1

F2 - Acquisition Parameters  
Date\_ 20170125  
Time 16.02  
INSTRUM spect  
PROBHD 5 mm PABBO BB/  
PULPROG zg30  
TD 65536  
SOLVENT DMSO  
NS 16  
DS 2  
SWH 8012.820 Hz  
FIDRES 0.122266 Hz  
AQ 4.0894465 sec  
RG 147.93  
DW 62.400 usec  
DE 6.50 usec  
TE 298.2 K  
D1 1.0000000 sec  
TD0 1

===== CHANNEL f1 =====  
SFO1 400.1324710 MHz  
NUC1 1H  
P1 10.00 usec  
PLW1 16.0000000 W

F2 - Processing parameters  
SI 65536  
SF 400.1300000 MHz  
WDW EM  
SSB 0  
LB 0.10 Hz  
GB 0  
PC 1.00

AHMED S-1A  
C13-BSU DMSO {C:\data} nmr 22

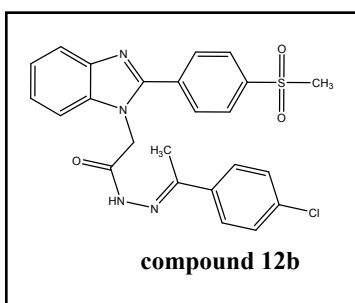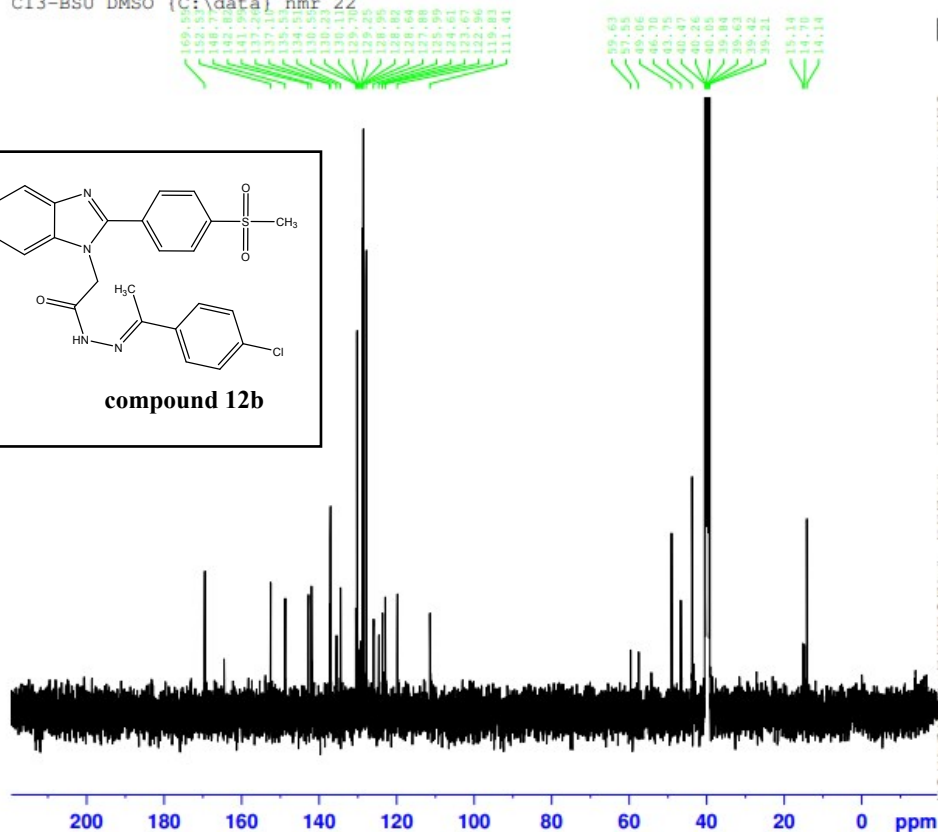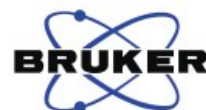

Current Data Parameters  
NAME Feb22-2017-nmr  
EXPNO 10  
PROCNO 1

F2 - Acquisition Parameters  
Date\_ 20170222  
Time 13.57  
INSTRUM spect  
PROBHD 5 mm PABBO BB/  
PULPROG zgpg30  
TD 65536  
SOLVENT DMSO  
NS 4000  
DS 4  
SWH 24038.461 Hz  
FIDRES 0.366798 Hz  
AQ 1.3631488 sec  
RG 205.44  
DW 20.800 usec  
DE 6.50 usec  
TE 298.2 K  
D1 2.0000000 sec  
D11 0.0300000 sec  
TD0 1

===== CHANNEL f1 =====  
SFO1 100.6228293 MHz  
NUC1 13C  
P1 10.00 usec  
PLW1 66.0000000 W

===== CHANNEL f2 =====  
SFO2 400.1316005 MHz  
NUC2 1H  
CFDPRG2 waltz16  
PCPD2 90.00 usec  
PLW2 16.0000000 W  
PLW12 0.2177999 W  
PLW13 0.17640001 W

F2 - Processing parameters  
SI 131072  
SF 100.6127690 MHz  
WDW EM  
SSB 0  
LB 1.00 Hz  
GB 0  
PC 1.40

# 27. <sup>1</sup>H and <sup>13</sup>C NMR Spectra of 12c:

MARCO-CL3  
PROTON\_BSU DMSO {C:\data} nmr 13

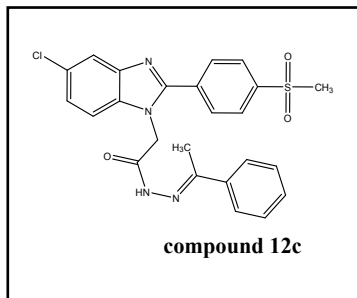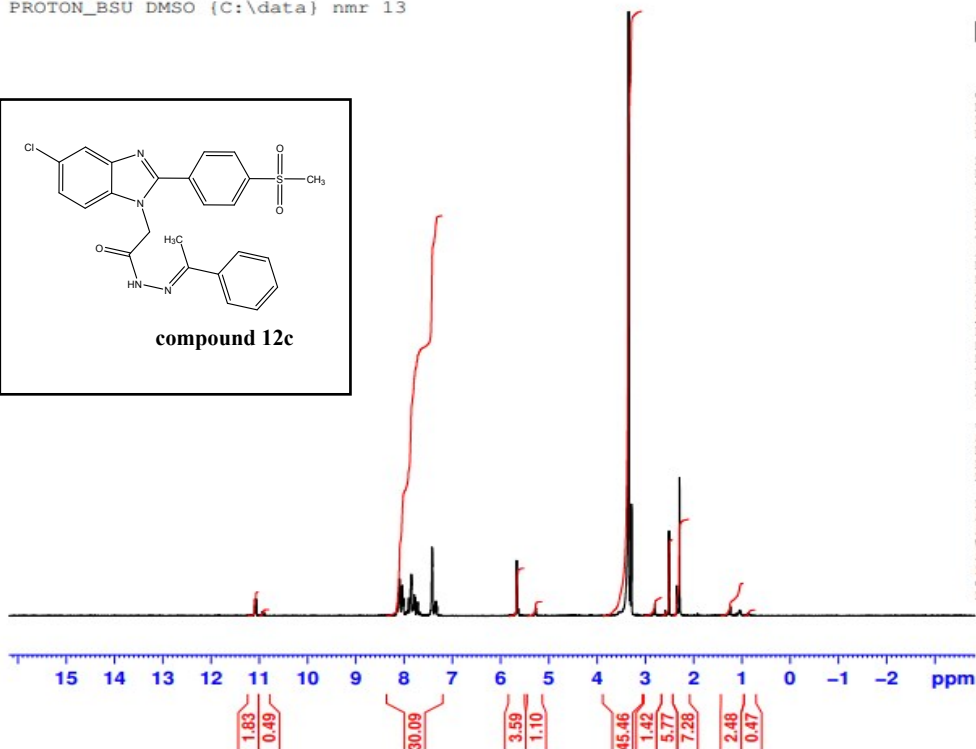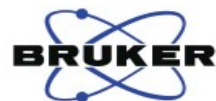

Current Data Parameters  
NAME Mar11-2017-nmr  
EXPNO 210  
PROCNO 1

F2 - Acquisition Parameters  
Date\_ 20170311  
Time 16.50  
INSTRUM spect  
PROBHD 5 mm PABBO BB/  
PULPROG zg30  
TD 65536  
SOLVENT DMSO  
NS 16  
DS 2  
SWH 8012.820 Hz  
FIDRES 0.122266 Hz  
AQ 4.0894465 sec  
RG 147.93  
DW 62.400 usec  
DE 6.50 usec  
TE 298.2 K  
D1 1.0000000 sec  
TD0 1

===== CHANNEL f1 =====  
SFO1 400.1324710 MHz  
NUC1 1H  
P1 10.00 usec  
PLW1 16.0000000 W

F2 - Processing parameters  
SI 65536  
SF 400.1300000 MHz  
WDW EM  
SSB 0  
LB 0.10 Hz  
GB 0  
PC 1.00

MARCO-CL3  
C13-BSU DMSO {C:\data} nmr 16

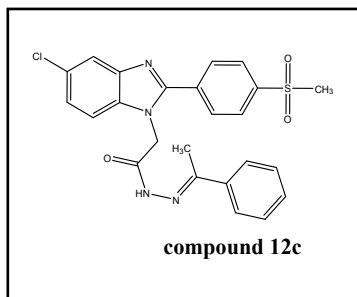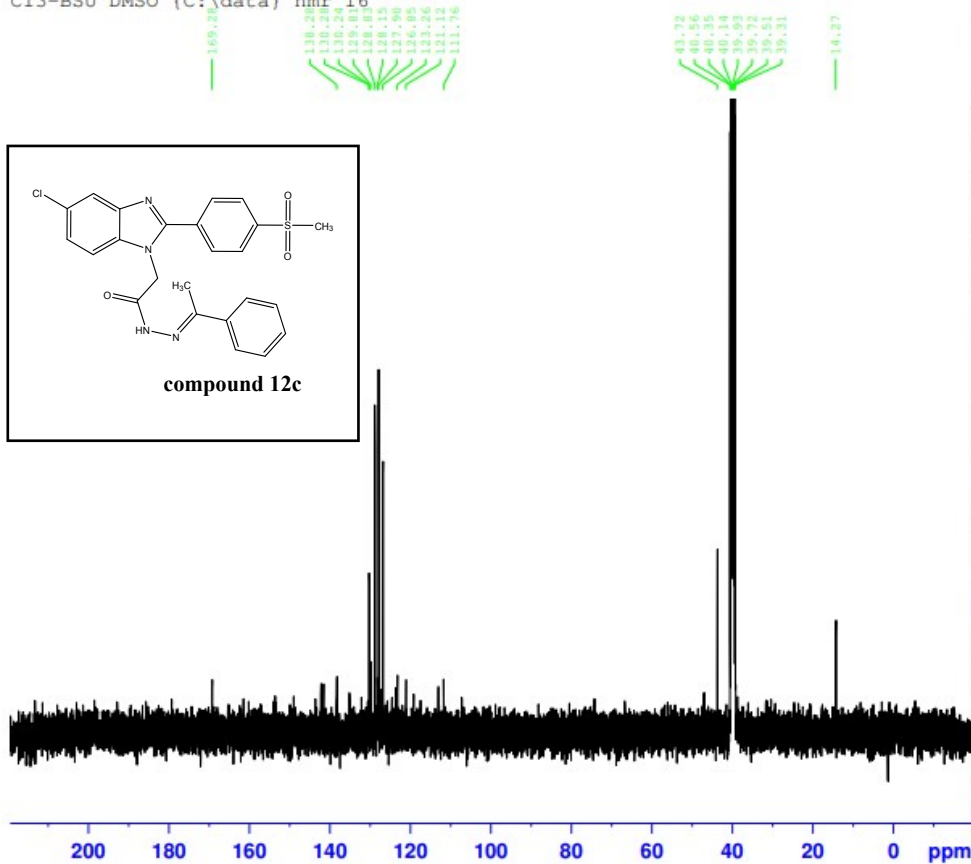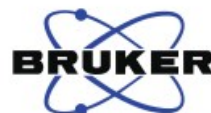

Current Data Parameters  
NAME Mar16-2017-nmr  
EXPNO 210  
PROCNO 1

F2 - Acquisition Parameters  
Date\_ 20170317  
Time 21.28  
INSTRUM spect  
PROBHD 5 mm PABBO BB/  
PULPROG zgpg30  
TD 65536  
SOLVENT DMSO  
NS 4000  
DS 4  
SWH 24038.461 Hz  
FIDRES 0.366798 Hz  
AQ 1.3631488 sec  
RG 205.44  
DW 20.800 usec  
DE 6.50 usec  
TE 298.1 K  
D1 2.0000000 sec  
D11 0.0300000 sec  
TD0 1

===== CHANNEL f1 =====  
SFO1 100.6228293 MHz  
NUC1 13C  
P1 10.00 usec  
PLW1 66.0000000 W

===== CHANNEL f2 =====  
SFO2 400.1316005 MHz  
NUC2 1H  
CPDPRG2 waltz16  
PCPD2 90.00 usec  
PLW2 16.0000000 W  
PLW12 0.2177999 W  
PLW13 0.17640001 W

F2 - Processing parameters  
SI 131072  
SF 100.6127690 MHz  
WDW EM  
SSB 0  
LB 1.00 Hz  
GB 0  
PC 1.40



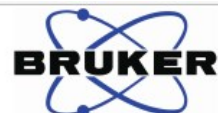

Current Data Parameters  
NAME Mar18-2017-nmr  
EXPNO 50  
PROCNO 1

F2 - Acquisition Parameters  
Date\_ 20170318  
Time 13.43  
INSTRUM spect  
PROBHD 5 mm PABBO BB/  
PULPROG zg30  
TD 65536  
SOLVENT DMSO  
NS 16  
DS 2  
SWH 8012.820 Hz  
FIDRES 0.122266 Hz  
AQ 4.0894465 sec  
RG 91.28  
DW 62.400 usec  
DE 6.50 usec  
TE 298.1 K  
D1 1.00000000 sec  
TD0 1

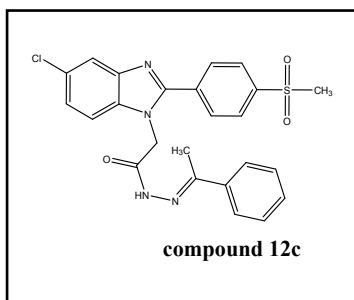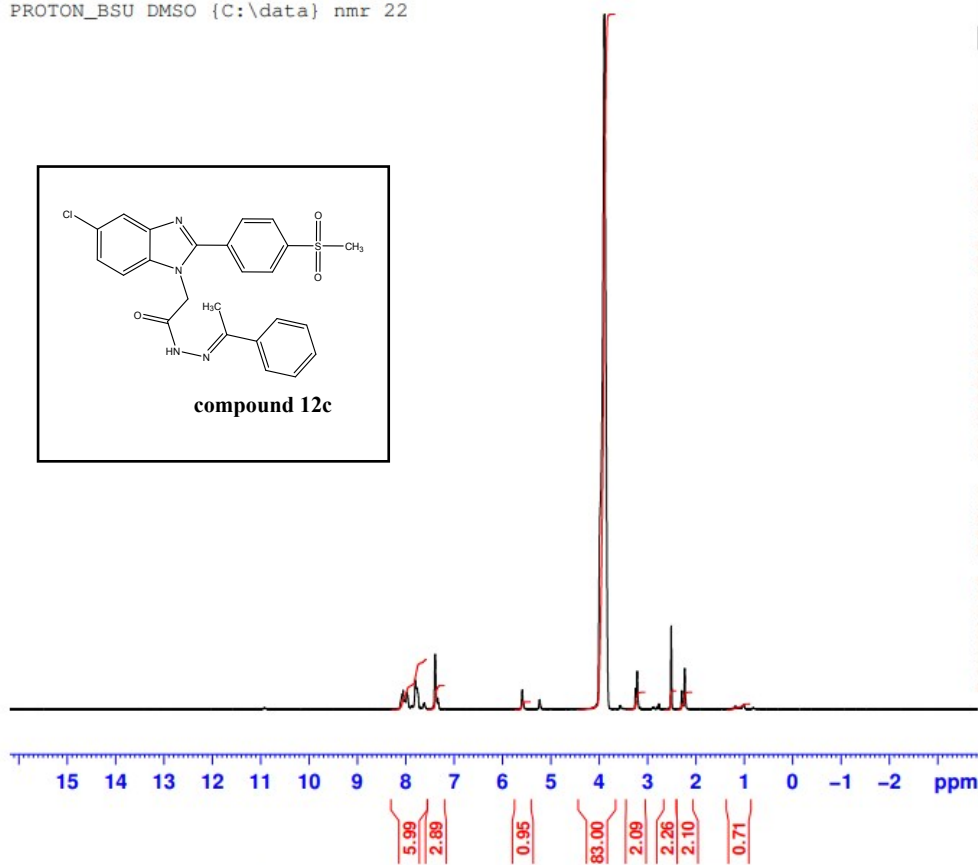

----- CHANNEL f1 -----  
SF01 400.1324710 MHz  
NUC1 1H  
P1 10.00 usec  
PLW1 16.00000000 W

F2 - Processing parameters  
SI 65536  
SF 400.1300000 MHz  
WDW EM  
SSB 0  
LB 0.10 Hz  
GB 0  
PC 1.00

## 28. <sup>1</sup>H and <sup>13</sup>C NMR Spectra of 12d:

MARCO-CL1  
PROTON\_BSU DMSO {C:\data} nmr 21

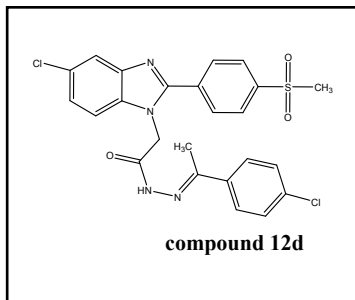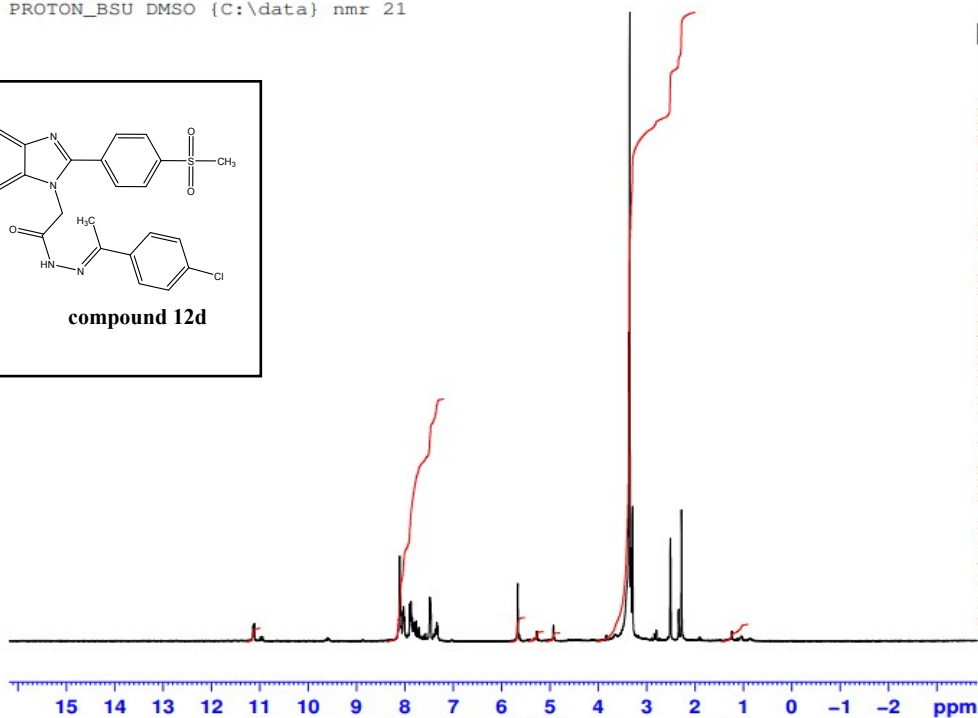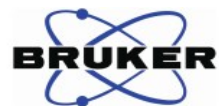

Current Data Parameters  
NAME Mar11-2017-nmr  
EXPNO 290  
PROCNO 1

F2 - Acquisition Parameters  
Date\_ 20170311  
Time 17.23  
INSTRUM spect  
PROBHD 5 mm PABBO BB/  
PULPROG zg30  
TD 65536  
RG 147.93  
SOLVENT DMSO  
NS 16  
DS 2  
SWH 8012.820 Hz  
FIDRES 0.122266 Hz  
AQ 4.0894465 sec  
RG 147.93  
DE 62.400 usec  
TE 298.2 K  
D1 1.00000000 sec  
TD0 1

----- CHANNEL f1 -----  
SFO1 400.1324710 MHz  
NUC1 1H  
P1 10.00 usec  
PLW1 16.00000000 W

F2 - Processing parameters  
SI 65536  
SF 400.1300000 MHz  
WDW EM  
SSB 0  
LB 0.10 Hz  
GB 0  
PC 1.00

MARCO-CL1  
C13-BSU DMSO {C:\data} nmr 12

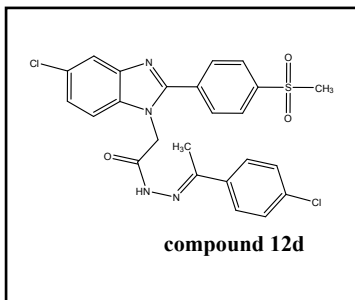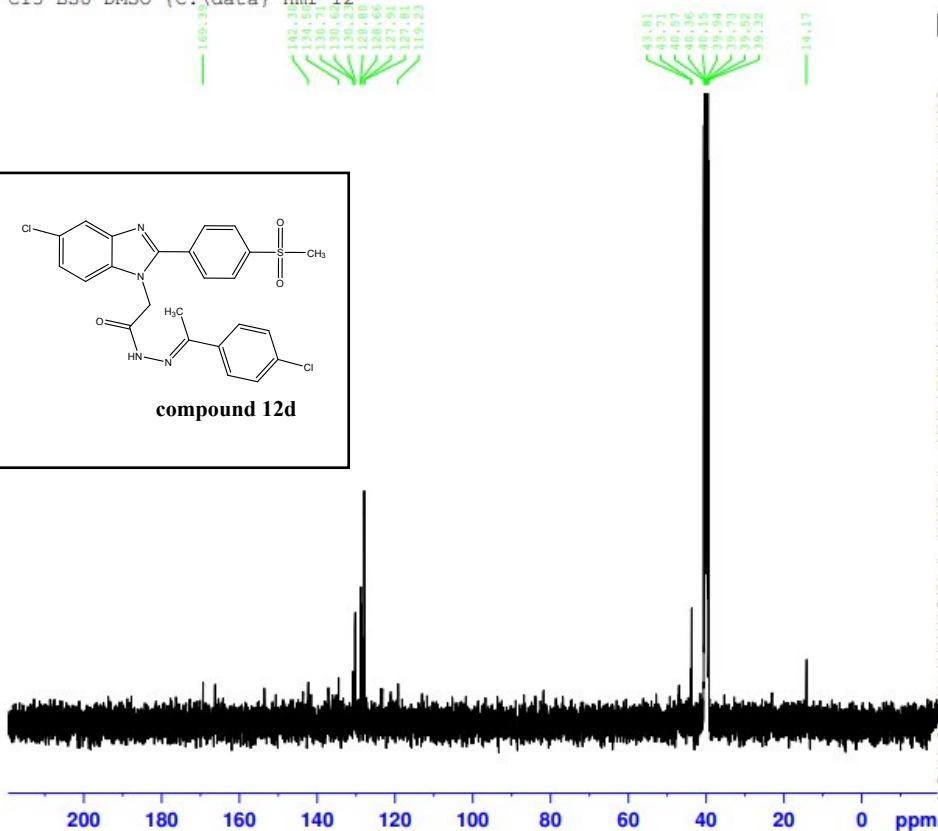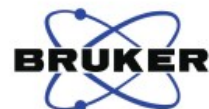

Current Data Parameters  
NAME Mar16-2017-nmr  
EXPNO 170  
PROCNO 1

F2 - Acquisition Parameters  
Date\_ 20170317  
Time 6.03  
INSTRUM spect  
PROBHD 5 mm PABBO BB/  
PULPROG zgpg30  
TD 65536  
SOLVENT DMSO  
NS 4000  
DS 4  
SWH 24038.461 Hz  
FIDRES 0.366798 Hz  
AQ 1.3631488 sec  
RG 205.44  
DE 20.800 usec  
TE 298.1 K  
D1 2.00000000 sec  
D11 0.03000000 sec  
TD0 1

===== CHANNEL f1 =====  
SFO1 100.6228293 MHz  
NUC1 13C  
P1 10.00 usec  
PLW1 66.00000000 W

===== CHANNEL f2 =====  
SFO2 400.1316005 MHz  
NUC2 1H  
CPDPRG2 waltz16  
PCPD2 90.00 usec  
PLW2 16.00000000 W  
PLW12 0.21777999 W  
PLW13 0.17640001 W

F2 - Processing parameters  
SI 131072  
SF 100.6127690 MHz  
WDW EM  
SSB 0  
LB 1.00 Hz  
GB 0  
PC 1.40

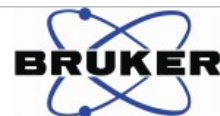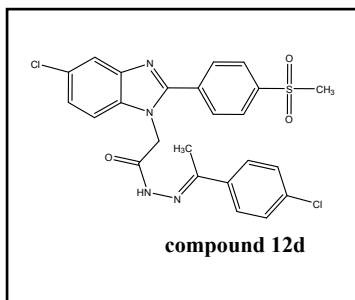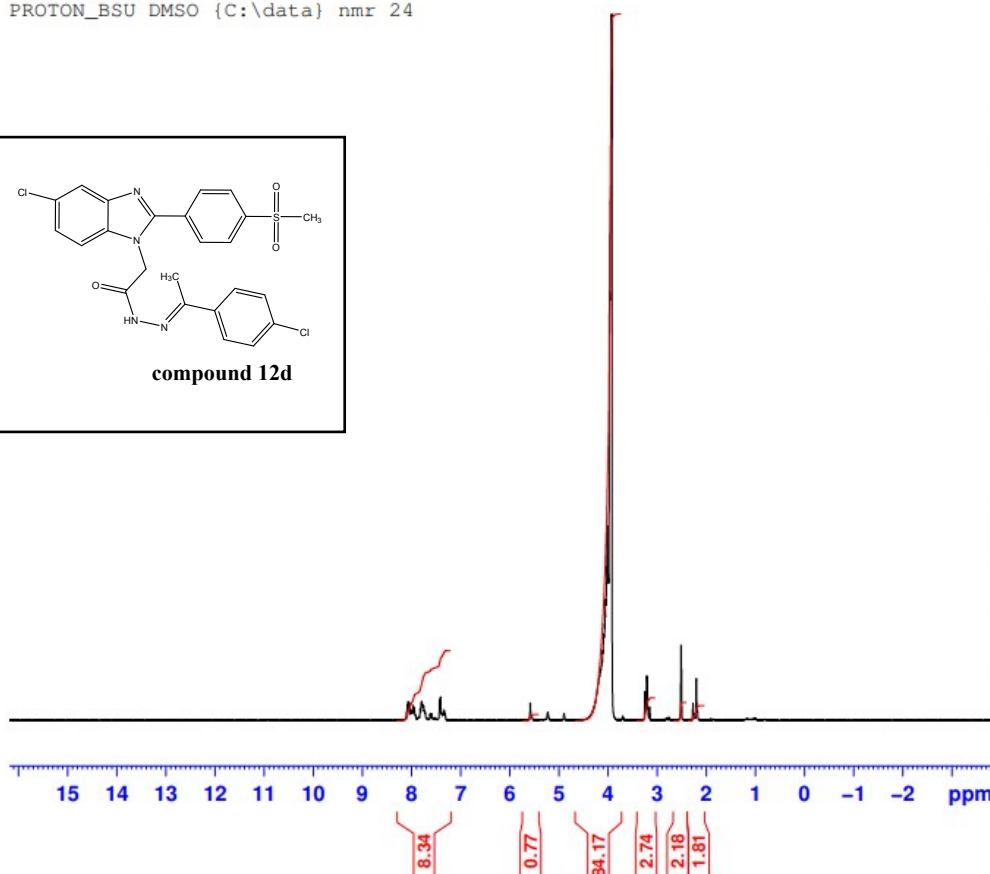

Current Data Parameters  
NAME Marl8-2017-nmr  
EXPNO 70  
PROCNO 1

F2 - Acquisition Parameters  
Date\_ 20170318  
Time 14.00  
INSTRUM spect  
PROBHD 5 mm PABBO BB/  
PULPROG zg30  
TD 65536  
SOLVENT DMSO  
NS 16  
DS 2  
SWH 8012.820 Hz  
FIDRES 0.122266 Hz  
AQ 4.0894465 sec  
RG 91.28  
DW 62.400 usec  
DE 6.50 usec  
TE 298.1 K  
D1 1.00000000 sec  
TD0 1

----- CHANNEL f1 -----  
SFO1 400.1324710 MHz  
NUC1 1H  
P1 10.00 usec  
PLW1 16.00000000 W

F2 - Processing parameters  
SI 65536  
SF 400.1300000 MHz  
WDW EM  
SSB 0  
LB 0.10 Hz  
GB 0  
PC 1.00

## 29. <sup>1</sup>H and <sup>13</sup>C NMR Spectra of 12e:

JOHN-34  
PROTON\_BSU DMSO {C:\data} nmr 11

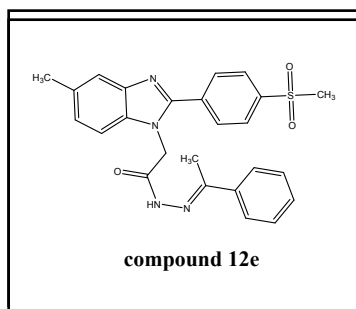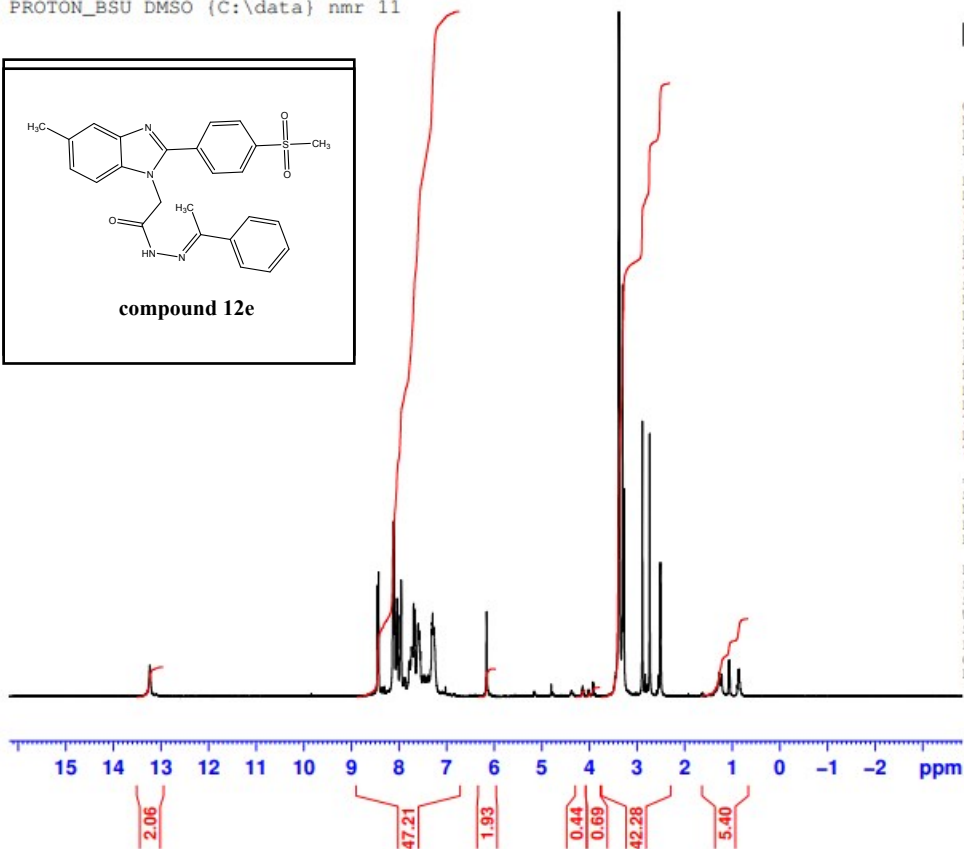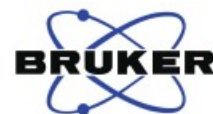

Current Data Parameters  
NAME Marl8-2017-nmr  
EXPNO 180  
PROCNO 1

F2 - Acquisition Parameters  
Date\_ 20170318  
Time 17.24  
INSTRUM spect  
PROBHD 5 mm PABBO BB/  
PULPROG zg30  
TD 65536  
SOLVENT DMSO  
NS 16  
DS 2  
SWH 8012.820 Hz  
FIDRES 0.122266 Hz  
AQ 4.0894465 sec  
RG 102.37  
DW 62.400 usec  
DE 6.50 usec  
TE 298.2 K  
D1 1.00000000 sec  
TD0 1

===== CHANNEL f1 =====  
SFO1 400.1324710 MHz  
NUC1 1H  
P1 10.00 usec  
PLW1 16.00000000 W

F2 - Processing parameters  
SI 65536  
SF 400.1300000 MHz  
WDW EM  
SSB 0  
LB 0.10 Hz  
GB 0  
PC 1.00



### 30. <sup>1</sup>H and <sup>13</sup>C NMR Spectra of 12f:

MARCO-ME1  
PROTON\_BSU DMSO (C:\data) nmr 4

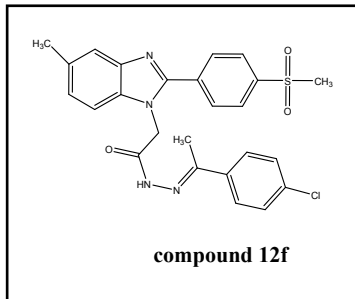

compound 12f

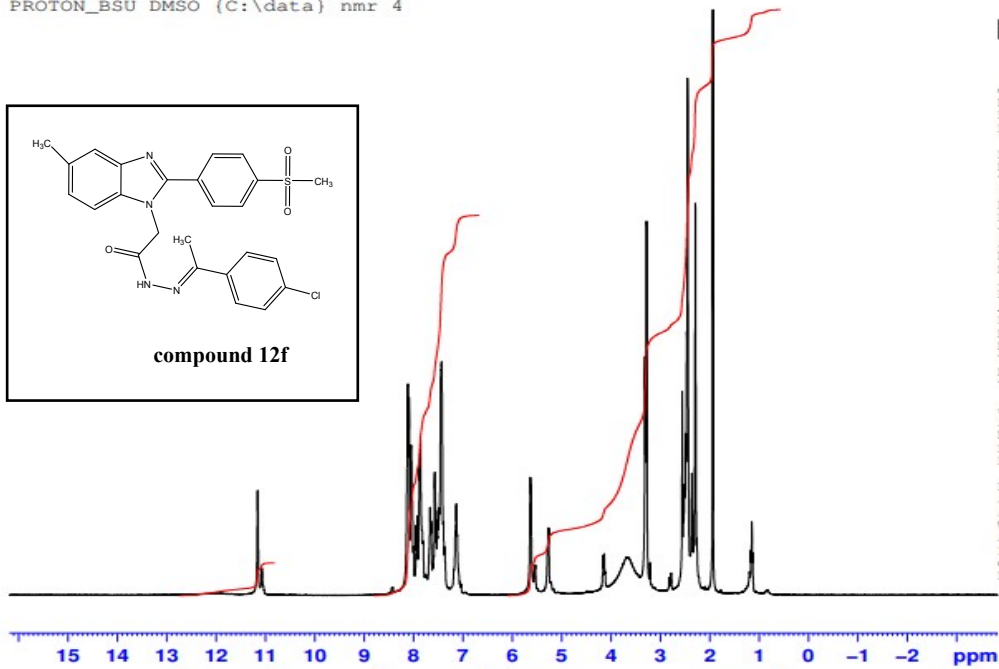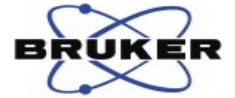

Current Data Parameters  
NAME Jul23-2017-nmr  
EXPNO 40  
PROCNO 1

F2 - Acquisition Parameters  
Date\_ 20170723  
Time 11.11  
INSTRUM spect  
PROBHD 5 mm PABBO BB/  
PULPROG zg30  
TD 65536  
SOLVENT DMSO  
NS 16  
DS 2  
SWH 8012.820 Hz  
FIDRES 0.122266 Hz  
AQ 4.0894465 sec  
RG 51.15  
DW 62.400 usec  
DE 6.50 usec  
TE 298.2 K  
D1 1.0000000 sec  
TDO 1

==== CHANNEL f1 =====  
SFO1 400.1324710 MHz  
NUC1 1H  
P1 10.00 usec  
PLW1 16.0000000 W

F2 - Processing parameters  
SI 65536  
SF 400.1300000 MHz  
WDW EM  
SSB 0  
LB 0.10 Hz  
GB 0  
PC 1.00

MARCO-ME1  
C13-BSU DMSO (C:\data) nmr 20

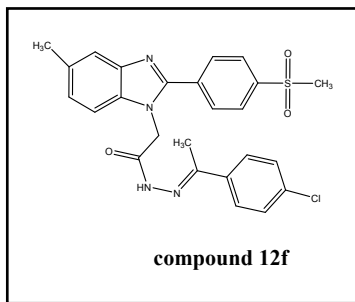

compound 12f

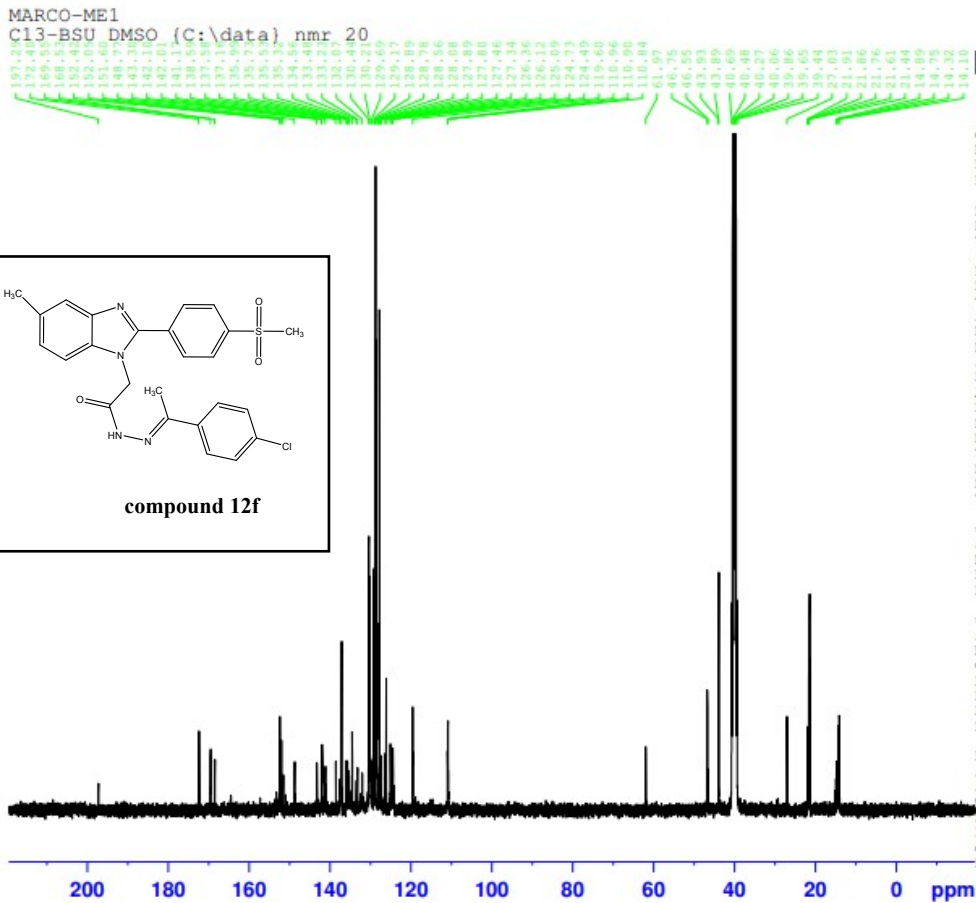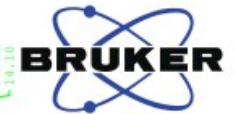

Current Data Parameters  
NAME Jul23-2017-nmr  
EXPNO 200  
PROCNO 1

F2 - Acquisition Parameters  
Date\_ 20170724  
Time 7.29  
INSTRUM spect  
PROBHD 5 mm PABBO BB/  
PULPROG zgpg30  
TD 65536  
SOLVENT DMSO  
NS 4000  
DS 4  
SWH 24038.461 Hz  
FIDRES 0.366798 Hz  
AQ 1.3631488 sec  
RG 205.44  
DW 20.800 usec  
DE 6.50 usec  
TE 313.1 K  
D1 2.0000000 sec  
D11 0.0300000 sec  
TDO 1

==== CHANNEL f1 =====  
SFO1 100.6228293 MHz  
NUC1 13C  
P1 10.00 usec  
PLW1 66.0000000 W

==== CHANNEL f2 =====  
SFO2 400.1316005 MHz  
NUC2 1H  
CPDPRG[2] waltz16  
PCPD2 90.00 usec  
PLW2 16.0000000 W  
PLW12 0.2177999 W  
PLW13 0.17640001 W

F2 - Processing parameters  
SI 131072  
SF 100.6127690 MHz  
WDW EM  
SSB 0  
LB 1.00 Hz  
GB 0  
PC 1.40



MARCO-ME1-D2O  
PROTON\_BSU DMSO (C:\data) nmr 7

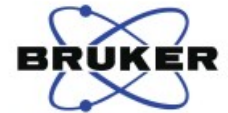

Current Data Parameters  
NAME Jul25-2017-nmr  
EXPNO 30  
PROCNO 1

F2 - Acquisition Parameters  
Date\_ 20170725  
Time 13.12  
INSTRUM spect  
PROBHD 5 mm PABBO BB/  
PULPROG zg30  
TD 65536  
SOLVENT DMSO  
NS 16  
DS 2  
SWH 8012.820 Hz  
FIDRES 0.122266 Hz  
AQ 4.0894465 sec  
RG 56.51  
DW 62.400 usec  
DE 6.50 usec  
TE 298.2 K  
D1 1.00000000 sec  
TD0 1

==== CHANNEL f1 =====  
SF01 400.1324710 MHz  
NUC1 1H  
P1 10.00 usec  
PLW1 16.00000000 W

F2 - Processing parameters  
SI 65536  
SF 400.1300000 MHz  
WDW EM  
SSB 0  
LB 0.10 Hz  
GB 0  
PC 1.00

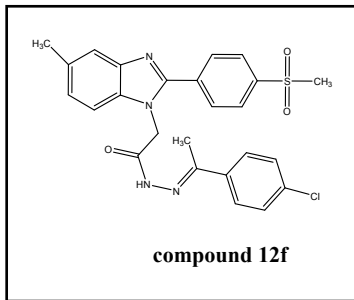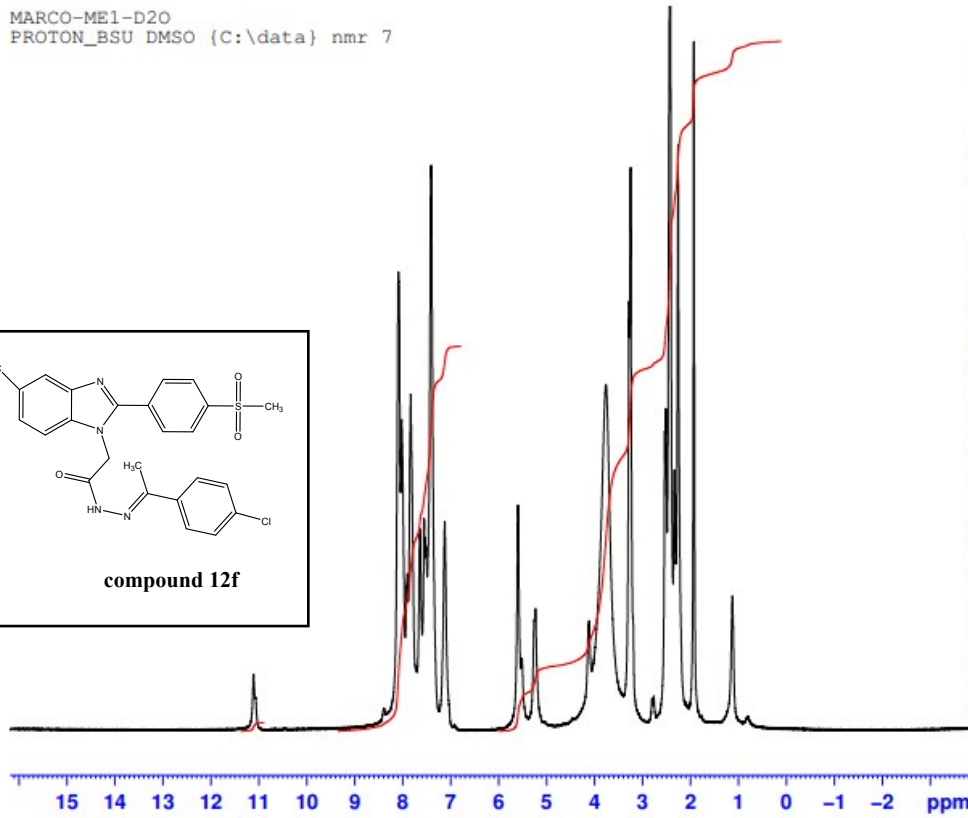

Supplement: d1ra04756f1.pdf [file d1ra04756f1.pdf]
